# Supplementary material for: Stereochemistry-dependent thermotropic liquid crystalline phases of monosaccharide-based amphiphiles
Source: Royal Society of Chemistry journal article supplement (doi:10.1039/d3sm00939d), 2023-01-01
Supplement: d3sm00939d1.pdf [file d3sm00939d1.pdf]

# Supporting information

## Stereochemistry-dependent thermotropic liquid crystalline phases of monosaccharide-based amphiphiles

Ida Mattsson,<sup>†</sup> Johanna Majoinen,<sup>‡</sup> Manu Lahtinen,<sup>⊥</sup> Thomas Sandberg,<sup>†</sup> Anna Fogde,<sup>†</sup> Tiina Saloranta-Simell,<sup>†</sup>

Orlando J. Rojas,<sup>‡,§</sup> Olli Ikkala,<sup>#</sup> and Reko Leino<sup>\*,†</sup>

<sup>†</sup> Laboratory of Molecular Science and Engineering, Johan Gadolin Process Chemistry Centre, Åbo Akademi University, FI-20500 Finland

<sup>‡</sup> Department of Bioproducts and Biosystems, School of Chemical Engineering, Aalto University, FI-00076 Aalto, Finland

<sup>⊥</sup> Department of Chemistry, University of Jyväskylä, FI-40014, Finland

<sup>§</sup> Bioproducts Institute, Department of Chemical and Biological Engineering, Department of Chemistry and Department of Wood Science, University of British Columbia, 2360 East Mall, Vancouver, BC V6T 1Z4, Canada

<sup>#</sup> Department of Applied Physics, Aalto University, Espoo FI-00076, Finland

## Contents

|                                                                                                                 |    |
|-----------------------------------------------------------------------------------------------------------------|----|
| Synthesis and characterization of allylated monosaccharides .....                                               | 4  |
| Allylation of D-mannose ( <b>Man</b> ) to yield <i>t</i> - <b>Man</b> * .....                                   | 4  |
| Allylation of D-glucose ( <b>Glc</b> ) to yield <i>t</i> - <b>Glc</b> * and <i>e</i> - <b>Glc</b> * .....       | 5  |
| Allylation of D-galactose ( <b>Gal</b> ) to yield <i>t</i> - <b>Gal</b> * and <i>e</i> - <b>Gal</b> * .....     | 6  |
| Allylation of L-arabinose ( <b>Ara</b> ) to yield <i>t</i> - <b>Ara</b> * and <i>e</i> - <b>Ara</b> * .....     | 7  |
| Allylation of L-rhamnose ( <b>Rha</b> ) to yield <i>t</i> - <b>Rha</b> * .....                                  | 8  |
| Synthesis and characterization of liquid crystalline amphiphiles .....                                          | 9  |
| Coupling of <i>t</i> - <b>Man</b> * with 1-hexanethiol to yield <i>t</i> - <b>Man</b> *- <b>SC6</b> .....       | 9  |
| Coupling of <i>t</i> - <b>Man</b> * with 1-decanethiol to yield <i>t</i> - <b>Man</b> *- <b>SC10</b> .....      | 9  |
| Coupling of <i>t</i> - <b>Man</b> * with 1-tetradecanethiol to yield <i>t</i> - <b>Man</b> *- <b>SC14</b> ..... | 10 |
| Coupling of <i>t</i> - <b>Glc</b> * with 1-tetradecanethiol to yield <i>t</i> - <b>Glc</b> *- <b>SC14</b> ..... | 10 |
| Coupling of <i>e</i> - <b>Glc</b> * with 1-tetradecanethiol to yield <i>e</i> - <b>Glc</b> *- <b>SC14</b> ..... | 11 |
| Coupling of <i>t</i> - <b>Gal</b> * with 1-tetradecanethiol to yield <i>t</i> - <b>Gal</b> *- <b>SC14</b> ..... | 11 |
| Coupling of <i>e</i> - <b>Gal</b> * with 1-tetradecanethiol to yield <i>e</i> - <b>Gal</b> *- <b>SC14</b> ..... | 12 |
| Coupling of <i>t</i> - <b>Ara</b> * with 1-tetradecanethiol to yield <i>t</i> - <b>Ara</b> *- <b>SC14</b> ..... | 12 |
| Coupling of <i>e</i> - <b>Ara</b> * with 1-tetradecanethiol to yield <i>e</i> - <b>Ara</b> *- <b>SC14</b> ..... | 13 |
| Coupling of <i>t</i> - <b>Rha</b> * with 1-tetradecanethiol to yield <i>t</i> - <b>Rha</b> *- <b>SC14</b> ..... | 13 |
| NMR spectra .....                                                                                               | 14 |
| <sup>1</sup> H and <sup>13</sup> C NMR spectra of compound <i>t</i> - <b>Man</b> * .....                        | 14 |
| <sup>1</sup> H-and <sup>13</sup> C NMR spectra of compound <i>t</i> - <b>Glc</b> * .....                        | 15 |
| <sup>1</sup> H-and <sup>13</sup> C NMR spectra of compound <i>e</i> - <b>Glc</b> * .....                        | 16 |
| <sup>1</sup> H-and <sup>13</sup> C NMR spectra of compound <i>t</i> - <b>Gal</b> * .....                        | 17 |
| <sup>1</sup> H-and <sup>13</sup> C NMR spectra of compound <i>e</i> - <b>Gal</b> * .....                        | 18 |
| <sup>1</sup> H-and <sup>13</sup> C NMR spectra of compound <i>t</i> - <b>Ara</b> * .....                        | 19 |
| <sup>1</sup> H-and <sup>13</sup> C NMR spectra of compound <i>e</i> - <b>Ara</b> * .....                        | 20 |
| <sup>1</sup> H-and <sup>13</sup> C NMR spectra of compound <i>t</i> - <b>Rha</b> * .....                        | 21 |
| <sup>1</sup> H-and <sup>13</sup> C NMR spectra of compound <i>t</i> - <b>Man</b> *- <b>SC6</b> .....            | 22 |
| <sup>1</sup> H-and <sup>13</sup> C NMR spectra of compound <i>t</i> - <b>Man</b> *- <b>SC10</b> .....           | 23 |
| <sup>1</sup> H-and <sup>13</sup> C NMR spectra of compound <i>t</i> - <b>Man</b> *- <b>SC14</b> .....           | 24 |
| <sup>1</sup> H-and <sup>13</sup> C NMR spectra of compound <i>t</i> - <b>Glc</b> *- <b>SC14</b> .....           | 25 |
| <sup>1</sup> H-and <sup>13</sup> C NMR spectra of compound <i>e</i> - <b>Glc</b> *- <b>SC14</b> .....           | 26 |
| <sup>1</sup> H-and <sup>13</sup> C NMR spectra of compound <i>t</i> - <b>Gal</b> *- <b>SC14</b> .....           | 27 |
| <sup>1</sup> H-and <sup>13</sup> C NMR spectra of compound <i>e</i> - <b>Gal</b> *- <b>SC14</b> .....           | 28 |
| <sup>1</sup> H-and <sup>13</sup> C NMR spectra of compound <i>t</i> - <b>Ara</b> *- <b>SC14</b> .....           | 29 |
| <sup>1</sup> H-and <sup>13</sup> C NMR spectra of compound <i>e</i> - <b>Ara</b> *- <b>SC14</b> .....           | 30 |
| <sup>1</sup> H-and <sup>13</sup> C NMR spectra of compound <i>t</i> - <b>Rha</b> *- <b>SC14</b> .....           | 31 |
| Conformational analysis of allylated monosaccharides .....                                                      | 32 |
| Thermal analysis of allylated monosaccharides .....                                                             | 34 |
| Thermal events for amphiphiles derived from allylated monosaccharides .....                                     | 35 |

|                                                                         |    |
|-------------------------------------------------------------------------|----|
| DSC curves for amphiphiles derived from allylated monosaccharides ..... | 39 |
| DSC curve for <i>t</i> - <b>Man</b> *-SC6 .....                         | 39 |
| DSC curve for <i>t</i> - <b>Man</b> *-SC10 .....                        | 39 |
| DSC curve for <i>t</i> - <b>Man</b> *-SC14 .....                        | 40 |
| DSC curve for <i>t</i> - <b>Glc</b> *-SC14 .....                        | 40 |
| DSC curve for <i>e</i> - <b>Glc</b> *-SC14 .....                        | 41 |
| DSC curve for <i>t</i> - <b>Gal</b> *-SC14 .....                        | 41 |
| DSC curve for <i>e</i> - <b>Gal</b> *-SC14 .....                        | 42 |
| DSC curve for <i>t</i> - <b>Ara</b> *-SC14 .....                        | 42 |
| DSC curve for <i>e</i> - <b>Ara</b> *-SC14 .....                        | 43 |
| DSC curve for <i>t</i> - <b>Rha</b> *-SC14 .....                        | 43 |
| Polarized Optical Microscopy Observations .....                         | 44 |
| References .....                                                        | 51 |

## Synthesis and characterization of allylated monosaccharides

Allylation of D-mannose (**Man**) to yield *t*-**Man**\*

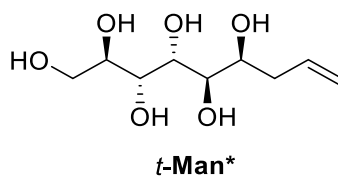

The synthetic procedure was conducted according to previously published methods<sup>1-5</sup>:

D-Mannose (5.0 g, 27.8 mmol, 1 eq.), tin powder (6.7 g, 56.4 mmol, 2 eq.) and allyl bromide (10.0 g, 83.2 mmol, 3 eq.) were dissolved in 550 ml EtOH and 50 ml distilled H<sub>2</sub>O. The reaction mixture was heated to 60 °C and stirred overnight. The mixture was allowed to cool to room temperature and neutralized with 5 M NaOH (aq). The mixture was filtered through Celite. The filtrate was evaporated until approximately 80 ml solution remained. The solution was left in the refrigerator overnight to yield 2.96 g of *t*-**Man**\* as a white powder (48% yield).

### (2*R*,3*R*,4*R*,5*R*,6*S*)-Non-8-ene-1,2,3,4,5,6-hexaol (*t*-**Man**\*)

<sup>1</sup>H-NMR (500.20 MHz, D<sub>2</sub>O, 25 °C): δ = 5.90 (dddd,  $J_{8,7b} = 6.9$  Hz,  $J_{8,7a} = 7.1$  Hz,  $J_{8,9cis} = 10.2$  Hz,  $J_{8,9trans} = 17.2$  Hz, 1 H, H-8), 5.18 (dddd,  $J_{9trans,7a} = -1.4$  Hz,  $J_{9trans,7b} = -1.5$  Hz,  $J_{9trans,9cis} = -2.1$  Hz, 1 H, H-9<sub>trans</sub>), 5.13 (dddd,  $J_{9cis,7a} = -1.1$  Hz,  $J_{9cis,7b} = -1.1$  Hz, 1 H, H-9<sub>cis</sub>), 3.99 (ddd,  $J_{6,5} = 1.5$  Hz,  $J_{6,7b} = 5.7$  Hz,  $J_{6,7a} = 8.3$  Hz, 1 H, H-6), 3.91 (dd,  $J_{4,3} = 1.1$  Hz,  $J_{4,5} = 9.4$  Hz, 1 H, H-4), 3.87 (dd,  $J_{1a,2} = 3.0$  Hz,  $J_{1a,1b} = -11.9$  Hz, 1 H, H-1a), 3.81 (dd,  $J_{3,2} = 8.9$  Hz, 1 H, H-3), 3.76 (ddd,  $J_{2,1b} = 6.5$  Hz, 1 H, H-2), 3.67 (dd, 1 H, H-1b), 3.59 (dd, 1 H, H-5), 2.40 (dddd,  $J_{7a,7b} = -14.2$  Hz, 1 H, H-7a), 2.35 (dddd, 1 H, H-7b) ppm. <sup>13</sup>C NMR (125.8 MHz, D<sub>2</sub>O, 25 °C): δ = 135.2 (C-8), 117.3 (C-9), 71.0 (C-5), 70.9 (C-2), 69.4 (C-3), 69.3 (C-6), 68.5 (C-4), 63.2 (C-1), 37.6 (C-7) ppm.

## Allylation of D-glucose (**Glc**) to yield *t*-**Glc**\* and *e*-**Glc**\*

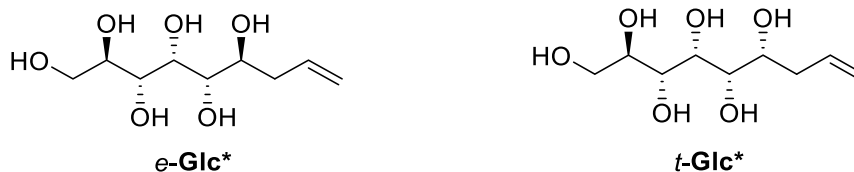

The synthetic procedure was conducted according to previously published methods<sup>1-3</sup>:

D-Glucose (5.0 g, 27.8 mmol, 1 eq.), tin powder (6.7 g, 56.4 mmol, 2 eq.) and allyl bromide (10.0 g, 83.2 mmol, 3 eq.) were dissolved in 550 ml EtOH and 50 ml distilled H<sub>2</sub>O. The reaction mixture was heated to 60 °C and stirred overnight. The mixture was allowed to cool to room temperature and neutralized with 5 M NaOH (aq). The mixture was filtered through Celite. The filtrate was evaporated to dryness and the crude product was obtained as an offwhite powder. The crude product was acetylated with acetic anhydride (9 eq.) in pyridine. The acetylated diastereomers were separated by column chromatography (hexane:ethyl acetate 2:1). Deacetylation was subsequently conducted with NaOMe in dry methanol. The reaction was neutralized with Dowex. The reaction mixtures were filtered and evaporated to dryness. The products were obtained as white powders: 3.24 g of *t*-**Glc**\* and 0.86 g of *e*-**Glc**\* equaling total yield of 4.10 g (66 %).

### (2*R*,3*R*,4*R*,5*S*,6*R*)-Non-8-ene-1,2,3,4,5,6-hexaol (*t*-**Glc**\*)

<sup>1</sup>H NMR (500.20 MHz, D<sub>2</sub>O, 25 °C): δ = 5.88 (dddd,  $J_{8,7a} = 6.6$  Hz,  $J_{8,7b} = 7.4$  Hz,  $J_{8,9cis} = 10.2$  Hz,  $J_{8,9trans} = 17.2$  Hz, 1 H, H-8), 5.19 (dddd,  $J_{9trans,7a} = 1.5$  Hz,  $J_{9trans,7b} = 1.3$  Hz,  $J_{9trans,9cis} = 2.0$  Hz, 1 H, H-9trans), 5.14 (dddd,  $J_{9cis,7a} = 1.0$  Hz,  $J_{9cis,7b} = <1$  Hz, 1 H, H-9cis), 3.96 (dd,  $J_{4,3} = 2.3$  Hz,  $J_{4,5} = 6.1$  Hz, 1 H, H-4), 3.84 (ddd,  $J_{6,5} = 3.5$  Hz,  $J_{6,7a} = 5.0$  Hz,  $J_{6,7b} = 8.2$  Hz, 1 H, H-6), 3.83 (dd,  $J_{1a,1b} = -11.9$  Hz,  $J_{1a,2} = 3.1$  Hz, 1 H, H-1a), 3.78 (ddd,  $J_{2,1b} = 6.4$  Hz,  $J_{2,3} = 8.2$  Hz, 1 H, H-2), 3.71 (dd, 1 H, H-3), 3.67 (dd, 1 H, H-5), 3.65 (dd, 1 H, H-1b), 2.39 (dddd,  $J_{7a,7b} = -14.3$  Hz, 1 H, H-7a), 2.34 (m, 1 H, H-7b). <sup>13</sup>C NMR (125.8 MHz, D<sub>2</sub>O, 25 °C): δ = 134.8 (C-8), 117.6 (C-9), 73.8 (C-5), 71.0 (C-3), 71.0 (C-2), 70.3 (C-6), 69.9 (C-4), 62.8 (C-1), 37.4 (C-7) ppm.

### (2*R*,3*R*,4*R*,5*S*,6*S*)-Non-8-ene-1,2,3,4,5,6-hexaol (*e*-**Glc**\*)

<sup>1</sup>H NMR (500.20 MHz, D<sub>2</sub>O, 25 °C): δ = 5.92 (dddd,  $J_{8,7a} = 6.3$  Hz,  $J_{8,7b} = 7.8$  Hz,  $J_{8,9cis} = 10.3$  Hz,  $J_{8,9trans} = 17.2$  Hz, 1 H, H-8), 5.19 (dddd,  $J_{9trans,7a} = 1.6$  Hz,  $J_{9trans,7b} = 1.2$  Hz,  $J_{9trans,9cis} = 2.1$  Hz, 1 H, H-9trans), 5.16 (dddd,  $J_{9cis,7a} = 1.1$  Hz,  $J_{9cis,7b} = <1$  Hz, 1 H, H-9cis), 4.00 (dd,  $J_{4,3} = 3.0$  Hz,  $J_{4,5} = 3.7$  Hz, 1 H, H-4), 3.81 (dd,  $J_{1a,1b} = -11.9$  Hz,  $J_{1a,2} = 3.0$  Hz, 1 H, H-1a), 3.80 (ddd,  $J_{6,5} = 6.9$  Hz,  $J_{6,7a} = 3.1$  Hz,  $J_{6,7b} = 8.9$  Hz, 1 H, H-6), 3.78 (ddd,  $J_{2,1b} = 6.7$  Hz,  $J_{2,3} = 7.8$  Hz, 1 H, H-2), 3.70 (dd, 1 H, H-3), 3.67 (dd, 1 H, H-5), 3.65 (dd, 1 H, H-1b), 2.46 (dddd,  $J_{7a,7b} = -14.6$ , 1 H, H-7a), 2.24 (dddd, 1 H, H-7b) ppm. <sup>13</sup>C NMR (125.8 MHz, D<sub>2</sub>O, 25 °C): δ = 134.9 (C-8), 117.7 (C-9), 74.9 (C-5), 72.6 (C-3), 71.1 (C-2), 70.2 (C-6), 68.5 (C-4), 62.3 (C-1), 36.3 (C-7) ppm. HRMS calcd. for C<sub>9</sub>H<sub>18</sub>O<sub>6</sub>Na [M+Na]<sup>+</sup> 245.1001, found 245.1028.

## Allylation of D-galactose (**Gal**) to yield *t*-**Gal**\* and *e*-**Gal**\*

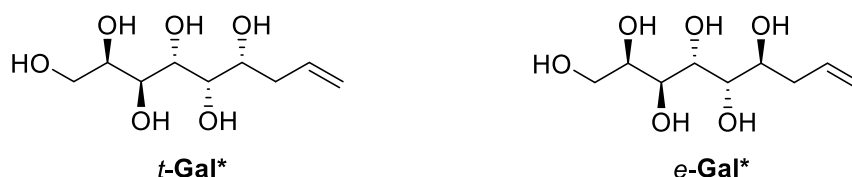

The synthetic procedure was conducted according to previously published methods<sup>1-3</sup>:

D-Galactose (5.0 g, 27.8 mmol, 1 eq.), tin powder (6.7 g, 56.4 mmol, 2 eq.) and allyl bromide (10.0 g, 83.2 mmol, 3 eq.) were dissolved in 550 ml EtOH and 50 ml distilled H<sub>2</sub>O. The reaction mixture was heated to 60 °C and stirred overnight. The mixture was allowed to cool to room temperature and neutralized with 5 M NaOH (aq). The mixture was filtered through Celite. The filtrate was evaporated to dryness and the crude product was obtained as an offwhite powder. The crude product was acetylated with acetic anhydride (9 eq.) in pyridine. The acetylated diastereomers were separated by column chromatography (hexane:ethyl acetate 2:1). Deacetylation was subsequently conducted with NaOMe in dry methanol. The reaction was neutralized with Dowex. The reaction mixtures were filtered and evaporated to dryness. The products were obtained as white powders: 2.02 g of *t*-Gal\* and 0.94 g of *e*-Gal\* equaling total yield of 2.96 g (48 %).

### (2*R*,3*S*,4*R*,5*S*,6*R*)-Non-8-ene-1,2,3,4,5,6-hexaol (*t*-Gal\*)

<sup>1</sup>H NMR (500.20 MHz, D<sub>2</sub>O, 25 °C): δ = 5.90 (dddd,  $J_{8,7a} = 6.5$  Hz,  $J_{8,7b} = 7.6$  Hz,  $J_{8,9cis} = 10.2$  Hz,  $J_{8,9trans} = 17.2$  Hz, 1 H, H-8), 5.19 (dddd,  $J_{9trans,7a} = 1.5$  Hz,  $J_{9trans,7b} = 1.3$  Hz,  $J_{9trans,9cis} = 2.0$  Hz, 1 H, H-9trans), 5.15 (dddd,  $J_{9cis,7a} = 1.1$  Hz,  $J_{9cis,7b} = <1$  Hz, 1 H, H-9cis), 3.96 (ddd,  $J_{2,1a} = 5.6$  Hz,  $J_{2,1b} = 7.2$  Hz,  $J_{2,3} = 1.5$  Hz, 1 H, H-2), 3.86 (ddd,  $J_{6,5} = 6.6$  Hz,  $J_{6,7a} = 4.1$  Hz,  $J_{6,7b} = 8.2$  Hz, 1 H, H-6), 3.79 (dd,  $J_{3,4} = 9.2$  Hz, 1 H, H-3), 3.76 (dd,  $J_{5,4} = 1.5$  Hz, 1 H, H-5), 3.70 (dd, 1 H, H-4), 3.69 (dd,  $J_{1a,1b} = -7.3$ , 1 H, H-1a), 3.69 (dd, 1 H, H-1b), 2.44 (dddd,  $J_{7a,7b} = -14.5$  Hz, 1 H, H-7a), 2.25 (dddd, 1 H, H-7b) ppm. <sup>13</sup>C NMR (125.8 MHz, D<sub>2</sub>O, 25 °C): δ = 134.5 (C-8), 117.8 (C-9), 72.2 (C-6), 71.7 (C-5), 70.0 (C-2), 70.0 (C-3), 69.5 (C-4), 63.2 (C-1), 37.0 (C-7) ppm.

### (2*R*,3*S*,4*R*,5*S*,6*S*)-Non-8-ene-1,2,3,4,5,6-hexaol (*e*-Gal\*)

<sup>1</sup>H NMR (500.20 MHz, D<sub>2</sub>O, 25 °C): δ = 5.94 (dddd,  $J_{8,7a} = 6.4$  Hz,  $J_{8,7b} = 7.8$  Hz,  $J_{8,9cis} = 10.2$  Hz,  $J_{8,9trans} = 17.3$  Hz, 1 H, H-8), 5.20 (dddd,  $J_{9trans,7a} = 1.6$  Hz,  $J_{9trans,7b} = 1.2$  Hz,  $J_{9trans,9cis} = 2.1$  Hz, 1 H, H-9trans), 5.16 (dddd,  $J_{9cis,7a} = 1.1$  Hz,  $J_{9cis,7b} = <1$  Hz, 1 H, H-9cis), 3.99 (ddd,  $J_{2,1a} = 5.6$  Hz,  $J_{2,1b} = 7.2$  Hz,  $J_{2,3} = 1.5$  Hz, 1 H, H-2), 3.94 (dd,  $J_{4,3} = 9.4$  Hz,  $J_{4,5} = 1.1$  Hz, 1 H, H-4), 3.79 (ddd,  $J_{6,5} = 8.5$  Hz,  $J_{6,7a} = 3.2$  Hz,  $J_{6,7b} = 8.5$  Hz, 1 H, H-6), 3.71 (dd, 1 H, H-5), 3.70 (dd,  $J_{1a,1b} = -6.8$  Hz, 1 H, H-1a), 3.69 (dd, 1 H, H-1b), 3.68 (dd, 1 H, H-3), 2.58 (dddd,  $J_{7a,7b} = -14.6$  Hz, 1 H, H-7a), 2.25 (dddd, 1 H, H-7b) ppm. <sup>13</sup>C NMR (125.8 MHz, D<sub>2</sub>O, 25 °C): δ = 135.0 (C-8), 117.7 (C-9), 71.4 (C-5), 70.3 (C-2), 70.0 (C-6), 69.4 (C-3), 68.3 (C-4), 63.3 (C-1), 37.5 (C-7) ppm. HRMS calcd. for C<sub>9</sub>H<sub>18</sub>O<sub>6</sub>Na [M+Na]<sup>+</sup> 245.1001, found 245.1018.

## Allylation of L-arabinose (**Ara**) to yield *t*-**Ara**\* and *e*-**Ara**\*

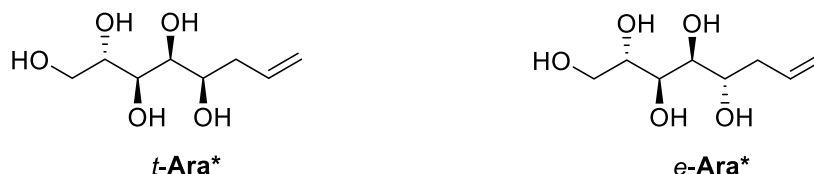

The synthetic procedure was conducted according to previously published methods<sup>1,2</sup>:

L-Arabinose (5.0 g, 33.3 mmol, 1 eq.), tin powder (7.9 g, 66.6 mmol, 2 eq.), and allyl bromide (12.1 g, 99.8 mmol, 3 eq.) were dissolved in 500 ml distilled water and 50 ml ethanol. The reaction mixture was heated to 60 °C and stirred at that temperature overnight. The reaction mixture was neutralized with 5 M NaOH solution and subsequently filtered through Celite. The filtrate was evaporated to dryness and the crude product was obtained as an offwhite powder. The crude product was acetylated with acetic anhydride (9 eq.) in pyridine. The acetylated diastereomers were separated by column chromatography (hexane:ethyl acetate 2:1). Deacetylation was subsequently conducted with NaOMe in dry methanol. The reaction was neutralized with Dowex. The reaction mixtures were filtered and evaporated to dryness. The products were obtained as white powders: 1.92 g of *t*-**Ara**\* and 0.71 g of *e*-**Ara**\* equaling total yield of 2.63 g (41 %).

### (2*S*,3*S*,4*S*,5*R*)-Oct-7-ene-1,2,3,4,5-pentaol (*t*-**Ara**\*)

<sup>1</sup>H NMR (500.20 MHz, D<sub>2</sub>O, 25 °C): δ = 5.89 (dddd,  $J_{7,6a} = 6.5$  Hz,  $J_{7,6b} = 7.6$  Hz,  $J_{7,8cis} = 10.3$  Hz,  $J_{7,8trans} = 17.2$  Hz, 1 H, H-7), 5.18 (dddd,  $J_{8trans,6a} = 1.6$  Hz,  $J_{8trans,6b} = 1.3$  Hz,  $J_{8trans,8cis} = 2.0$  Hz, 1 H, H-8trans), 5.15 (dddd,  $J_{8cis,6a} = 1.2$  Hz,  $J_{8cis,6b} < 1$  Hz, 1 H, H-8cis), 3.84 (ddd,  $J_{5,4} = 6.2$  Hz,  $J_{5,6a} = 4.3$  Hz,  $J_{5,6b} = 8.2$  Hz, 1 H, H-5), 3.83 (dd,  $J_{1a,1b} = -11.9$ ,  $J_{1a,2} = 3.0$ , 1 H, H-1a), 3.77 (ddd,  $J_{2,1b} = 6.5$  Hz,  $J_{2,3} = 8.3$  Hz, 1 H, H-2), 3.72 (dd,  $J_{4,3} = 2.1$  Hz, 1 H, H-4), 3.68 (dd, 1 H, H-3), 3.64 (dd, 1 H, H-1b), 2.41 (dddd,  $J_{6a,6b} = -14.5$  Hz, 1 H, H-6a), 2.25 (dddd, 1 H, H-6b). <sup>13</sup>C NMR (125.8 MHz, D<sub>2</sub>O, 25 °C): δ = 134.5 (C-7), 117.8 (C-8), 71.9 (C-5), 71.7 (C-4), 71.1 (C-3), 71.0 (C-2), 62.8 (C-1), 37.0 (C-6) ppm. HRMS calcd. for C<sub>8</sub>H<sub>16</sub>O<sub>5</sub>Na [M+Na]<sup>+</sup> 215.0895, found 215.0921.

### (2*S*,3*S*,4*S*,5*S*)-Oct-7-ene-1,2,3,4,5-pentaol (*e*-**Ara**\*)

<sup>1</sup>H NMR (500.20 MHz, D<sub>2</sub>O, 25 °C): δ = 5.93 (dddd,  $J_{7,6a} = 6.4$  Hz,  $J_{7,6b} = 7.8$  Hz,  $J_{7,8cis} = 10.3$  Hz,  $J_{7,8trans} = 17.2$  Hz, 1 H, H-7), 5.19 (dddd,  $J_{8trans,6a} = 1.5$  Hz,  $J_{8trans,6b} = 1.2$  Hz,  $J_{8trans,8cis} = 2.1$  Hz, 1 H, H-8trans), 5.16 (dddd,  $J_{8cis,6a} = 1.1$  Hz,  $J_{8cis,6b} < 1$  Hz, 1 H, H-8cis), 3.86 (dd,  $J_{1a,1b} = -11.9$ ,  $J_{1a,2} = 3.0$ , 1 H, H-1a), 3.82 (dd,  $J_{3,2} = 8.7$  Hz,  $J_{3,4} = 1.2$  Hz, 1 H, H-3), 3.77 (ddd,  $J_{5,4} = 8.4$  Hz,  $J_{5,6a} = 3.2$  Hz,  $J_{5,6b} = 8.4$  Hz, 1 H, H-5), 3.75 (ddd,  $J_{2,1b} = 6.5$  Hz, 1 H, H-2), 3.68 (dd, 1 H, H-4), 3.66 (dd, 1 H, H-1b), 2.56 (dddd,  $J_{6a,6b} = -14.6$  Hz, 1 H, H-6a), 2.25 (dddd, 1 H, H-6b) ppm. <sup>13</sup>C NMR (125.8 MHz, D<sub>2</sub>O, 25 °C): δ = 134.9 (C-7), 117.7 (C-8), 71.5 (C-4), 71.0 (C-2), 69.9 (C-5), 69.3 (C-3), 63.2 (C-1), 37.4 (C-6) ppm. HRMS calcd. for C<sub>8</sub>H<sub>16</sub>O<sub>5</sub>Na [M+Na]<sup>+</sup> 215.0895, found 215.0940.

## Allylation of L-rhamnose (**Rha**) to yield *t*-**Rha**\*

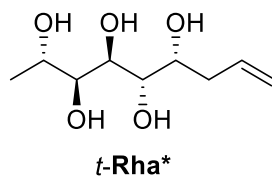

The synthetic procedure was conducted according to previously published methods<sup>1,2,4</sup>:

L-Rhamnose (5.0 g, 27.8 mmol, 1 eq.), tin powder (6.7 g, 56.4 mmol, 2 eq.) and allyl bromide (10.0 g, 83.2 mmol, 3 eq.) were dissolved in 550 ml EtOH and 50 ml distilled H<sub>2</sub>O. The reaction mixture was heated to 60 °C and stirred overnight. The mixture was allowed to cool to room temperature and neutralized with 5 M NaOH (aq). The mixture was filtered through Celite. The filtrate was evaporated until approximately 80 ml solution remained. The solution was left in the refrigerator overnight to yield 2.47 g of *t*-**Rha**\* as a white powder (43 % yield).

### (**2S,3S,4R,5S,6R**)-Non-8-ene-2,3,4,5,6-pentaol (*t*-**Rha**\*

<sup>1</sup>H-NMR (500.20 MHz, D<sub>2</sub>O, 25 °C): δ = 5.90 (dddd,  $J_{8,7a} = 7.1$  Hz,  $J_{8,7b} = 7.0$  Hz,  $J_{8,9cis} = 10.2$  Hz,  $J_{8,9trans} = 17.2$  Hz, 1 H, H-8), 5.19 (dddd,  $J_{9trans,7a} = 1.5$  Hz,  $J_{9trans,7b} = 1.5$  Hz,  $J_{9trans,9cis} = 2.1$  Hz, 1 H, H-9trans), 5.14 (dddd,  $J_{9cis,7a} = 1.1$  Hz,  $J_{9cis,7b} = 1.1$  Hz, 1 H, H-9cis), 3.98 (ddd,  $J_{6,5} = 1.6$  Hz,  $J_{6,7a} = 8.3$  Hz,  $J_{6,7b} = 5.8$  Hz, 1 H, H-6), 3.91 (dd,  $J_{4,3} = 1.3$  Hz,  $J_{4,5} = 9.2$  Hz, 1 H, H-4), 3.88 (dq,  $J_{2,1} = 6.3$  Hz,  $J_{2,3} = 7.9$  Hz, 1 H, H-2), 3.62 (dd, 1 H, H-3), 3.59 (dd, 1 H, H-5), 2.40 (dddd,  $J_{7a,7b} = -14.2$  Hz, 1H, H-7a), 2.35 (dddd, 1H, H-7b), 1.28 (d, 3H, H-1) ppm. <sup>13</sup>C NMR (125.8 MHz, D<sub>2</sub>O, 25 °C): δ = 135.2 (C-8), 117.4 (C-9), 73.4 (C-3), 71.2 (C-5), 69.3 (C-6), 68.5 (C-4), 67.2 (C-2), 37.6 (C-7), 19.0 (C-1) ppm.



## Synthesis and characterization of liquid crystalline amphiphiles

### Coupling of *t*-Man\* with 1-hexanethiol to yield *t*-Man\*-SC6

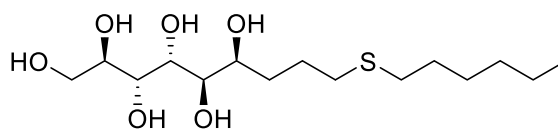

*t*-Man\*-SC6

Compound *t*-Man\* (50 mg, 0.225 mmol, 1 eq.), 1-hexanethiol (53 mg, 0.45 mmol, 2 eq.) and 2,2-dimethoxy-2-phenylacetophenone (5.8 mg, 0.0225 mmol, 0.1 eq.) were dissolved in 5 ml DMF. The solution was irradiated with 365 nm 125 W UV-light for 1 h. The product was purified by washing the formed solids with 2 x 10 ml hexane and 5 ml distilled water, followed by centrifugation, decantation and freeze drying. Product *t*-Man\*-SC6 was obtained as a white powder (56.3 mg, 73 % yield).

#### (2*R*,3*R*,4*R*,5*R*,6*S*)-9-(Hexylthio)nonane-1,2,3,4,5,6-hexaol (*t*-Man\*-SC6)

<sup>1</sup>H NMR (500.20 MHz, DMSO, 25 °C): δ = 4.38 (d, 1 H, OH-2), 4.32 (t, 1 H, OH-1), 4.08 (d, 1 H, OH-4), 4.06 (d, 1 H, OH-5), 4.03 (d, 1 H, OH-3), 3.98 (d, 1 H, OH-6), 3.68 (m, 1 H, H-4), 3.67 (m, 1 H, H-6), 3.61 (m, 1 H, H-1a), 3.56 (m, 1 H, H-3), 3.47 (m, 1 H, H-2), 3.38 (m, 1 H, H-1b), 3.25 (m, 1 H, H-5), 2.49 (m, 2 H, H-9), 2.47 (m, 2 H, H-10), 1.63 (m, 1 H, H-8a), 1.53 (m, 1 H, H-7a), 1.53 (m, 1 H, H-8b), 1.50 (m, 2 H, H-11), 1.46 (m, 1 H, H-7b), 1.27 (m, 4 H, H-12, H-14), 1.25 (m, 2 H, H-13), 0.86 (t, 3 H, H-15) ppm. <sup>13</sup>C NMR (125.8 MHz, DMSO, 25 °C): δ = 71.5 (C-2), 71.4 (C-5), 69.7 (C-3), 69.0 (C-6), 68.8 (C-4), 63.9 (C-1), 32.9 (C-7), 31.4 (C-9), 31.1 (C-10), 30.8 (C-13), 29.1 (C-11), 27.9 (C-12), 26.1 (C-8), 22.0 (C-14), 13.9 (C-15) ppm. HRMS calcd. for C<sub>15</sub>H<sub>32</sub>O<sub>6</sub>SNa [M+Na]<sup>+</sup> 363.1817, found 363.1819.

### Coupling of *t*-Man\* with 1-decanethiol to yield *t*-Man\*-SC10

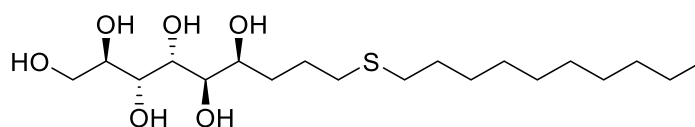

*t*-Man\*-SC10

Compound *t*-Man\* (50 mg, 0.225 mmol, 1 eq.), 1-decanethiol (78 mg, 0.45 mmol, 2 eq.) and 2,2-dimethoxy-2-phenylacetophenone (5.8 mg, 0.0225 mmol, 0.1 eq.) were dissolved in 5 ml DMF. The solution was irradiated with 365 nm 125 W UV-light for 1 h. The product was purified by washing the formed solids with 2 x 10 ml hexane and 5 ml distilled water, followed by centrifugation, decantation and freeze drying. Product *t*-Man\*-SC10 was obtained as a white powder (64.2 mg, 72 % yield).

#### (2*R*,3*R*,4*R*,5*R*,6*S*)-9-(Decylthio)nonane-1,2,3,4,5,6-hexaol (*t*-Man\*-SC10)

<sup>1</sup>H NMR (500.20 MHz, DMSO, 25 °C): δ = 4.38 (d, 1 H, OH-2), 4.32 (t, 1 H, OH-1), 4.07 (d, 1 H, OH-4), 4.05 (d, 1 H, OH-5), 4.03 (d, 1 H, OH-3), 3.98 (d, 1 H, OH-6), 3.68 (m, 1 H, H-4), 3.67 (m, 1 H, H-6), 3.61 (m, 1 H, H-1a), 3.56 (m, 1 H, H-3), 3.48 (m, 1 H, H-2), 3.38 (m, 1 H, H-1b), 3.25 (m, 1 H, H-5), 2.48 (m, 2 H, H-9), 2.46 (m, 2 H, H-10), 1.63 (m, 1 H, H-8a), 1.53 (m, 1 H, H-7a), 1.53 (m, 1 H, H-8b), 1.50 (m, 2 H, H-11), 1.48 (m, 1 H, H-7b), 1.57-1.17 (m, 14 H, H-12-H-18), 0.86 (t, 3 H, H-19) ppm. <sup>13</sup>C NMR (125.8 MHz, DMSO, 25 °C): δ = 71.5 (C-2), 71.4 (C-5), 69.7 (C-3), 69.0 (C-6), 68.8 (C-4), 63.9 (C-1), 32.9 (C-7), 31.4 (C-9), 31.1 (C-10), 26.2 (C-8), 13.9 (C-19), 31.3, 29.1, 29.0, 28.9, 28.7, 28.6, 28.2, 22.0 (C-11 – C-18) ppm. HRMS calcd. for C<sub>19</sub>H<sub>40</sub>O<sub>6</sub>SNa [M+Na]<sup>+</sup> 419.2443 found 419.2455

## Coupling of *t*-Man\* with 1-tetradecanethiol to yield *t*-Man\*-SC14

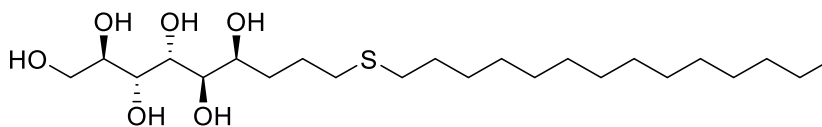

***t*-Man\*-SC14**

Compound *t*-Man\* (50 mg, 0.225 mmol, 1 eq.), 1-tetradecanethiol (104 mg, 0.45 mmol, 2 eq.) and 2,2-dimethoxy-2-phenylacetophenone (5.8 mg, 0.0225 mmol, 0.1 eq.) were dissolved in 5 ml DMF. The solution was irradiated with 365 nm 125 W UV-light for 1 h. The product was purified by washing the formed solids with 2 x 10 ml hexane and 5 ml distilled water, followed by centrifugation, decantation and freeze drying. Product *t*-Man\*-SC14 was obtained as a white powder (84.5 mg, 83 % yield).

### (2*R*,3*R*,4*R*,5*R*,6*S*)-9-(Tetradecylthio)nonane-1,2,3,4,5,6-hexaol (*t*-Man\*-SC14)

<sup>1</sup>H NMR (500.20 MHz, DMSO, 25 °C):  $\delta$  = 4.38 (d, 1 H, OH-2), 4.32 (t, 1 H, OH-1), 4.07 (d, 1 H, OH-4), 4.05 (d, 1 H, OH-5), 4.03 (d, 1 H, OH-3), 3.98 (d, 1 H, OH-6), 3.68 (m, 1 H, H-4), 3.67 (m, 1 H, H-6), 3.61 (m, 1 H, H-1a), 3.56 (m, 1 H, H-3), 3.47 (m, 1 H, H-2), 3.38 (m, 1 H, H-1b), 3.25 (m, 1 H, H-5), 2.48 (m, 2 H, H-9), 2.46 (m, 2 H, H-10), 1.63 (m, 1 H, H-8a), 1.53 (m, 1 H, H-7a), 1.53 (m, 1 H, H-8b), 1.50 (m, 2 H, H-11), 1.48 (m, 1 H, H-7b), 1.57-1.17 (m, 22 H, H-12-H-22), 0.86 (t, 3 H, H-23) ppm. <sup>13</sup>C NMR (125.8 MHz, DMSO, 25 °C):  $\delta$  = 71.5 (C-2), 71.4 (C-5), 69.7 (C-3), 69.0 (C-6), 68.8 (C-4), 63.9 (C-1), 32.9 (C-7), 31.4 (C-9), 31.1 (C-10), 26.1 (C-8), 13.9 (C-23), 31.3, 29.2, 29.0, 28.7, 28.6, 28.3, 22.1 (C-11 – C-22) ppm. HRMS calcd. for C<sub>19</sub>H<sub>40</sub>O<sub>6</sub>SNa [M+Na]<sup>+</sup> 475.3064 found 475.3045

## Coupling of *t*-Glc\* with 1-tetradecanethiol to yield *t*-Glc\*-SC14

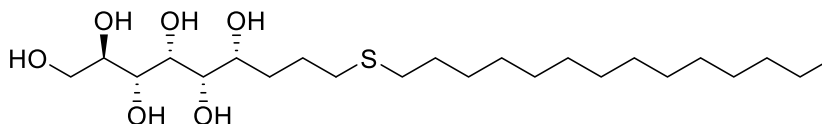

***t*-Glc\*-SC14**

Compound *t*-Glc\* (50 mg, 0.225 mmol, 1 eq.), 1-tetradecanethiol (104 mg, 0.45 mmol, 2 eq.) and 2,2-dimethoxy-2-phenylacetophenone (5.8 mg, 0.0225 mmol, 0.1 eq.) were dissolved in 5 ml DMF. The solution was irradiated with 365 nm 125 W UV-light for 1 h. The product was purified by washing the formed solids with 2 x 10 ml hexane and 5 ml distilled water, followed by centrifugation, decantation and freeze drying. Product *t*-Glc\*-SC14 was obtained as a white powder (75.6 mg, 76 % yield).

### (2*R*,3*R*,4*R*,5*S*,6*R*)-9-(Tetradecylthio)nonane-1,2,3,4,5,6-hexaol (*t*-Glc\*-SC14)

<sup>1</sup>H NMR (500.20 MHz, DMSO, 25 °C):  $\delta$  = 4.45 (d, 1 H, OH-3), 4.42 (d, 1 H, OH-2), 4.34 (d, 1 H, OH-6), 4.33 (d, 1 H, OH-5), 4.31 (t, 1 H, OH-1), 4.13 (d, 1 H, OH-4), 3.74 (m, 1 H, H-4), 3.57 (m, 1 H, H-1a), 3.51 (m, 1 H, H-6), 3.48 (m, 1 H, H-2), 3.43 (m, 1 H, H-3), 3.37 (m, 1 H, H-1b), 3.34 (m, 1 H, H-5), 2.47 (m, 2 H, H-9), 2.47 (m, 2 H, H-10), 1.63 (m, 1 H, H-8a), 1.49 (m, 1 H, H-8b), 1.49 (m, 2 H, H-11), 1.48 (m, 2 H, H-7), 1.37-1.18 (m, 22 H, H-12 – H-22), 0.85 (t, 3 H, H-23) ppm. <sup>13</sup>C NMR (125.8 MHz, DMSO, 25 °C):  $\delta$  = 74.5 (C-5), 71.5 (C-3), 71.3 (C-2), 69.8 (C-6), 69.4 (C-4), 63.4 (C-1), 32.6 (C-7), 31.2 (C-9), 31.0 (C-10), 29.0 (C-11), 25.8 (C-8), 13.9 (C-23), 31.2, 28.9, 28.6, 28.5, 28.2, 22.0 (C-12 – C-22) ppm. HRMS calcd. for C<sub>23</sub>H<sub>48</sub>O<sub>6</sub>SNa [M+Na]<sup>+</sup> 475.3064, found 475.3073.

## Coupling of *e*-Glc\* with 1-tetradecanethiol to yield *e*-Glc\*-SC14

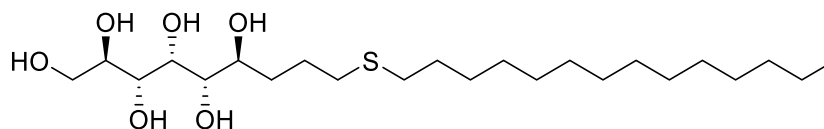

***e*-Glc\*-SC14**

Compound *e*-Glc\* (50 mg, 0.225 mmol, 1 eq.), 1-tetradecanethiol (104 mg, 0.45 mmol, 2 eq.) and 2,2-dimethoxy-2-phenylacetophenone (5.8 mg, 0.0225 mmol, 0.1 eq.) were dissolved in 5 ml DMF. The solution was irradiated with 365 nm 125 W UV-light for 1 h. The product was purified by washing the formed solids with 2 x 10 ml hexane and 5 ml distilled water, followed by centrifugation, decantation and freeze drying. Product *e*-Glc\*-SC14 was obtained as a white powder (83.4 mg, 85 % yield).

### **(2*R*,3*R*,4*R*,5*S*,6*S*)-9-(Tetradecylthio)nonane-1,2,3,4,5,6-hexaol (*e*-Glc\*-SC14)**

<sup>1</sup>H NMR (500.20 MHz, DMSO, 25 °C): δ = 4.55 (d, 1 H, OH-3), 4.51 (d, 1 H, OH-5), 4.49 (d, 1 H, OH-2), 4.44 (d, 1 H, OH-6), 4.32 (t, 1 H, OH-1), 4.05 (d, 1 H, OH-4), 3.90 (m, 1 H, H-4), 3.56 (m, 1 H, H-1a), 3.50 (m, 1 H, H-2), 3.44 (m, 1 H, H-6), 3.40 (m, 1 H, H-3), 3.37 (m, 1 H, H-1b), 3.27 (m, 1 H, H-5), 2.47 (m, 2 H, H-9), 2.47 (m, 2 H, H-10), 1.69 (m, 1 H, H-8a), 1.68 (m, 1 H, H-7a), 1.52 (m, 1 H, H-8b), 1.50 (m, 2 H, H-11), 1.38-1.18 (m, 22 H, H-12 – H-22), 1.31 (m, 1 H, H-7b), 0.85 (t, 3 H, H-23) ppm. <sup>13</sup>C NMR (125.8 MHz, DMSO, 25 °C): δ = 76.4 (C-5), 74.0 (C-3), 71.3 (C-2), 69.8 (C-6), 67.3 (C-4), 63.2 (C-1), 32.2 (C-7), 31.4 (C-9), 31.0 (C-10), 29.0 (C-11), 25.4 (C-8), 13.8 (C-23), 31.2, 28.9, 28.6, 28.5, 28.2, 22.0 (C-12 – C-22) ppm. HRMS calcd. for C<sub>23</sub>H<sub>48</sub>O<sub>6</sub>SNa [M+Na]<sup>+</sup> 475.3064, found 475.3108.

## Coupling of *t*-Gal\* with 1-tetradecanethiol to yield *t*-Gal\*-SC14

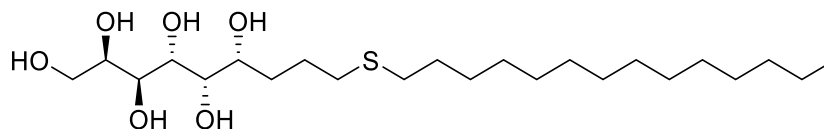

***t*-Gal\*-SC14**

Compound *t*-Gal\* (50 mg, 0.225 mmol, 1 eq.), 1-tetradecanethiol (104 mg, 0.45 mmol, 2 eq.) and 2,2-dimethoxy-2-phenylacetophenone (5.8 mg, 0.0225 mmol, 0.1 eq.) were dissolved in 5 ml DMF. The solution was irradiated with 365 nm 125 W UV-light for 1 h. The product was purified by washing the formed solids with 2 x 10 ml hexane and 5 ml distilled water, followed by centrifugation, decantation and freeze drying. Product *t*-Gal\*-SC14 was obtained as a white powder (93.5 mg, 94 % yield).

### **(2*R*,3*S*,4*R*,5*S*,6*R*)-9-(Tetradecylthio)nonane-1,2,3,4,5,6-hexaol (*t*-Gal\*-SC14)**

<sup>1</sup>H NMR (500.20 MHz, DMSO, 25 °C): δ = 4.41 (t, 1 H, OH-1), 4.38 (d, 1 H, OH-6), 4.22 (d, 1 H, OH-4), 4.11 (d, 1 H, OH-2), 4.05 (d, 1 H, OH-5), 4.04 (d, 1 H, OH-3), 3.69 (m, 1 H, H-2), 3.51 (m, 1 H, H-6), 3.48 (m, 1 H, H-3), 3.47 (m, 1 H, H-4), 3.47 (m, 1 H, H-5), 3.39 (m, 2 H, H-1), 2.48 (m, 2 H, H-9), 2.47 (m, 2 H, H-10), 1.66 (m, 1 H, H-8a), 1.52 (m, 1 H, H-8b), 1.52 (m, 1 H, H-7a), 1.49 (m, 2 H, H-11), 1.38 (m, 1 H, H-7b), 1.36-1.19 (m, 22 H, H-12 – H-22), 0.85 (t, 3 H, H-23) ppm. <sup>13</sup>C NMR (125.8 MHz, DMSO, 25 °C): δ = 72.0 (C-6), 71.5 (C-3), 70.6 (C-4), 69.7 (C-2), 69.2 (C-5), 63.0 (C-1), 32.2 (C-7), 31.3 (C-9), 31.0 (C-10), 29.1 (C-11), 25.6 (C-8), 13.9 (C-23), 31.2, 28.9, 28.6, 28.5, 28.1, 22.0 (C-12 – C-22) ppm. HRMS calcd. for C<sub>23</sub>H<sub>48</sub>O<sub>6</sub>SNa [M+Na]<sup>+</sup> 475.3064, found 475.3076.

## Coupling of *e*-Gal\* with 1-tetradecanethiol to yield *e*-Gal\*-SC14

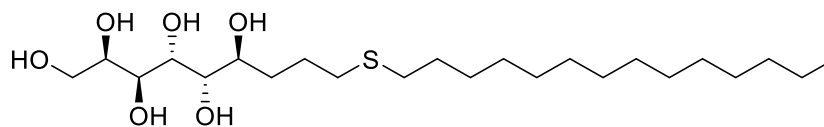

***e*-Gal\*-SC14**

Compound *e*-Gal\* (50 mg, 0.225 mmol, 1 eq.), 1-tetradecanethiol (104 mg, 0.45 mmol, 2 eq.) and 2,2-dimethoxy-2-phenylacetophenone (5.8 mg, 0.0225 mmol, 0.1 eq.) were dissolved in 5 ml DMF. The solution was irradiated with 365 nm 125 W UV-light for 1 h. The product was purified by washing the formed solids with 2 x 10 ml hexane and 5 ml distilled water, followed by centrifugation, decantation and freeze drying. Product *e*-Gal\*-SC14 was obtained as a white powder (92.6 mg, 94 % yield).

### **(2*R*,3*S*,4*R*,5*S*,6*S*)-9-(Tetradecylthio)nonane-1,2,3,4,5,6-hexaol (*e*-Gal\*-SC14)**

<sup>1</sup>H NMR (500.20 MHz, DMSO, 25 °C): δ = 4.41 (t, 1 H, OH-1), 4.38 (d, 1 H, OH-6), 4.10 (d, 1 H, OH-2), 4.00 (d, 1 H, OH-5), 3.96 (d, 1 H, OH-4), 3.95 (d, 1 H, OH-3), 3.72 (m, 1 H, H-4), 3.71 (m, 1 H, H-2), 3.44 (m, 1 H, H-3), 3.41 (m, 1 H, H-6), 3.40 (m, 2 H, H-1), 3.38 (m, 1 H, H-5), 2.47 (m, 4 H, H-9, H-10), 1.74 (m, 1 H, H-7a), 1.71 (m, 1 H, H-8a), 1.52 (m, 1 H, H-8b), 1.50 (m, 2 H, H-11), 1.38-1.17 (m, 22 H, H-12 – H-22), 1.32 (m, 1 H, H-7b), 0.85 (t, 3 H, H-23) ppm. <sup>13</sup>C NMR (125.8 MHz, DMSO, 25 °C): δ = 71.8 (C-5), 70.1 (C-2), 70.0 (C-6), 69.2 (C-3), 68.3 (C-4), 63.1 (C-1), 33.1 (C-7), 31.5 (C-9), 31.2 (C-10), 29.1 (C-11), 25.5 (C-8), 13.9 (C-23), 31.0, 28.9, 28.6, 28.5, 28.1, 22.0 (C-12 – C-22) ppm. HRMS calcd. for C<sub>23</sub>H<sub>48</sub>O<sub>6</sub>SNa [M+Na]<sup>+</sup> 475.3064, found 475.3073.

## Coupling of *t*-Ara\* with 1-tetradecanethiol to yield *t*-Ara\*-SC14

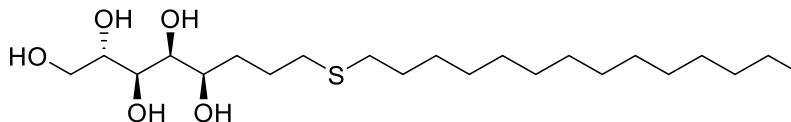

***t*-Ara\*-SC14**

Compound *t*-Ara\* (50 mg, 0.26 mmol, 1 eq.), 1-tetradecanethiol (119 mg, 0.52 mmol, 2 eq.) and 2,2-dimethoxy-2-phenylacetophenone (6.7 mg, 0.026 mmol, 0.1 eq.) were dissolved in 5 ml DMF. The solution was irradiated with 365 nm 125 W UV-light for 1 h. The product was purified by washing the formed solids with 2 x 10 ml hexane and 5 ml distilled water, followed by centrifugation, decantation and freeze drying. Product *t*-Ara\*-SC14 was obtained as white powder (85.9 mg, 81 % yield).

### **(2*S*,3*S*,4*S*,5*R*)-8-(Tetradecylthio)octane-1,2,3,4,5-pentaol (*t*-Ara\*-SC14)**

<sup>1</sup>H NMR (500.20 MHz, DMSO, 25 °C): δ = 4.45 (d, 1 H, OH-2), 4.39 (d, 1 H, OH-5), 4.30 (t, 1 H, OH-1), 4.30 (d, 1 H, OH-3), 4.12 (d, 1 H, OH-4), 3.57 (m, 1 H, H-1a), 3.53-3.42 (m, 3 H, H-2, H-4, H-5), 3.37 (m, 1 H, H-1b), 3.34 (m, 1 H, H-3), 2.46 (m, 2 H, H-8), 2.46 (m, 2 H, H-9), 1.65 (m, 1 H, H-7a), 1.51 (m, 1 H, H-7b), 1.51 (m, 1 H, H-6a), 1.49 (m, 2 H, H-10), 1.38 (m, 1 H, H-6b), 1.37-1.19 (m, 22 H, H-11 – H-21), 0.85 (t, 3 H, H-22) ppm. <sup>13</sup>C NMR (125.8 MHz, DMSO, 25 °C): δ = 71.8 (C-3), 71.8 (C-5), 71.4 (C-4), 71.3 (C-2), 63.3 (C-1), 32.1 (C-6), 31.3 (C-8), 31.0 (C-9), 29.0 (C-10), 25.6 (C-7), 13.9 (C-23), 31.2, 28.9, 28.6, 28.5, 28.1, 22.0 (C-11 – C-21) ppm. HRMS calcd. for C<sub>22</sub>H<sub>46</sub>O<sub>5</sub>SNa [M+Na]<sup>+</sup> 445.2958, found 445.2969.

## Coupling of *e*-Ara\* with 1-tetradecanethiol to yield *e*-Ara\*-SC14

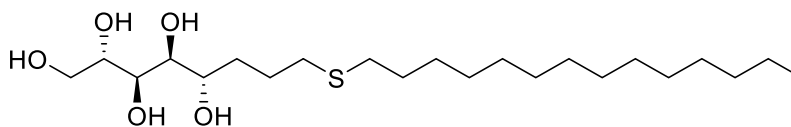

*e*-Ara\*-SC14

Compound *e*-Ara\* (50 mg, 0.26 mmol, 1 eq.), 1-tetradecanethiol (119 mg, 0.52 mmol, 2 eq.) and 2,2-dimethoxy-2-phenylacetophenone (6.7 mg, 0.026 mmol, 0.1 eq.) were dissolved in 5 ml DMF. The solution was irradiated with 365 nm 125 W UV-light for 1 h. The product was purified by washing the formed solids with 2 x 10 ml hexane and 5 ml distilled water, followed by centrifugation, decantation and freeze drying. Product *e*-Ara\*-SC14 was obtained as a white powder (89.4 mg, 84 % yield).

### (2*S*,3*S*,4*S*,5*S*)-8-(Tetradecylthio)octane-1,2,3,4,5-pentaol (*e*-Ara\*-SC14)

<sup>1</sup>H NMR (500.20 MHz, DMSO, 25 °C): δ = 4.41 (d, 1 H, OH-2), 4.40 (d, 1 H, OH-5), 4.32 (t, 1 H, OH-1), 4.10 (d, 1 H, OH-4), 4.03 (d, 1 H, OH-3), 3.60 (m, 1 H, H-1a), 3.57 (m, 1 H, H-3), 3.45 (m, 1 H, H-2), 3.40 (m, 1 H, H-5), 3.37 (m, 1 H, H-1b), 3.35 (m, 1 H, H-4), 2.47 (m, 2 H, H-8), 2.47 (m, 2 H, H-9), 1.73 (m, 1 H, H-6a), 1.71 (m, 1 H, H-7a), 1.52 (m, 1 H, H-7b), 1.50 (m, 2 H, H-10), 1.37-1.19 (m, 22 H, H-11 – H-21), 1.31 (m, 1 H, H-6b), 0.85 (t, 3 H, H-22) ppm. <sup>13</sup>C NMR (125.8 MHz, DMSO, 25 °C): δ = 71.9 (C-4), 71.4 (C-2), 69.7 (C-5), 69.6 (C-3), 63.8 (C-1), 33.0 (C-6), 31.5 (C-8), 31.0 (C-9), 29.1 (C-10), 25.5 (C-7), 13.9 (C-23), 31.2, 28.9, 28.6, 28.5, 28.1, 22.0 (C-11 – C-21) ppm. HRMS calcd. for C<sub>22</sub>H<sub>46</sub>O<sub>5</sub>SNa [M+Na]<sup>+</sup> 445.2958, found 445.2983.

## Coupling of *t*-Rha\* with 1-tetradecanethiol to yield *t*-Rha\*-SC14

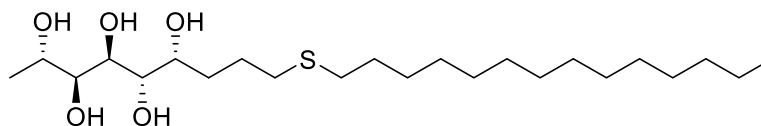

*t*-Rha\*-SC14

Compound *t*-Rha\* (100 mg, 0.48 mmol, 1 eq.), 1-tetradecanethiol (221.2 mg, 0.96 mmol, 2 eq.) and 2,2-dimethoxy-2-phenylacetophenone (12.3 mg, 0.048 mmol, 0.1 eq.) were dissolved in 10 ml DMF. The solution was irradiated with 365 nm 125 W UV-light for 1 h. The product was purified by washing the formed solids with 2 x 10 ml hexane and 5 ml distilled water, followed by centrifugation, decantation and freeze drying. Product *t*-Rha\*-SC14 was obtained as a white powder (179.9 mg, 89 % yield).

### (2*S*,3*S*,4*R*,5*S*,6*R*)-9-(Tetradecylthio)nonane-2,3,4,5,6-pentaol (*t*-Rha\*-SC14)

<sup>1</sup>H NMR (500.20 MHz, DMSO, 25 °C): δ = 4.38 (d, 1 H, OH-2), 4.08 (d, 1 H, OH-5), 4.00 (d, 1 H, OH-4), 3.99 (d, 1 H, OH-3), 3.98 (d, 1 H, OH-6), 3.70 (m, 1 H, H-4), 3.66 (m, 1 H, H-6), 3.58 (m, 1 H, H-2), 3.32 (m, 1 H, H-3), 3.24 (m, 1 H, H-5), 2.48 (m, 2 H, H-9), 2.47 (m, 2 H, H-10), 1.63 (m, 1 H, H-8a), 1.53 (m, 1 H, H-7a), 1.52 (m, 1 H, H-8b), 1.50 (m, 2 H, H-11), 1.46 (m, 1 H, H-7b), 1.33 (m, 2 H, H-12), 1.30-1.19 (m, 20 H, H-13 - H-22), 1.11 (t, 3 H, H-1), 0.85 (t, 3 H, H-23) ppm. <sup>13</sup>C NMR (125.8 MHz, DMSO, 25 °C): δ = 73.4 (C-3), 71.6 (C-5), 69.0 (C-6), 68.5 (C-4), 66.5 (C-2), 32.8 (C-7), 31.3 (C-9), 31.0 (C-10), 29.1 (C-11), 28.2 (C-12), 26.0 (C-8), 20.8 (C-1), 13.8 (C-23), 31.2, 28.9, 28.6, 28.5, 22.0 (C-13 – C-22). HRMS calcd. for C<sub>23</sub>H<sub>48</sub>O<sub>5</sub>SNa [M+Na]<sup>+</sup> 459.3115, found 459.3115.

# NMR spectra

$^1\text{H}$  and  $^{13}\text{C}$  NMR spectra of compound *t*-Man\*

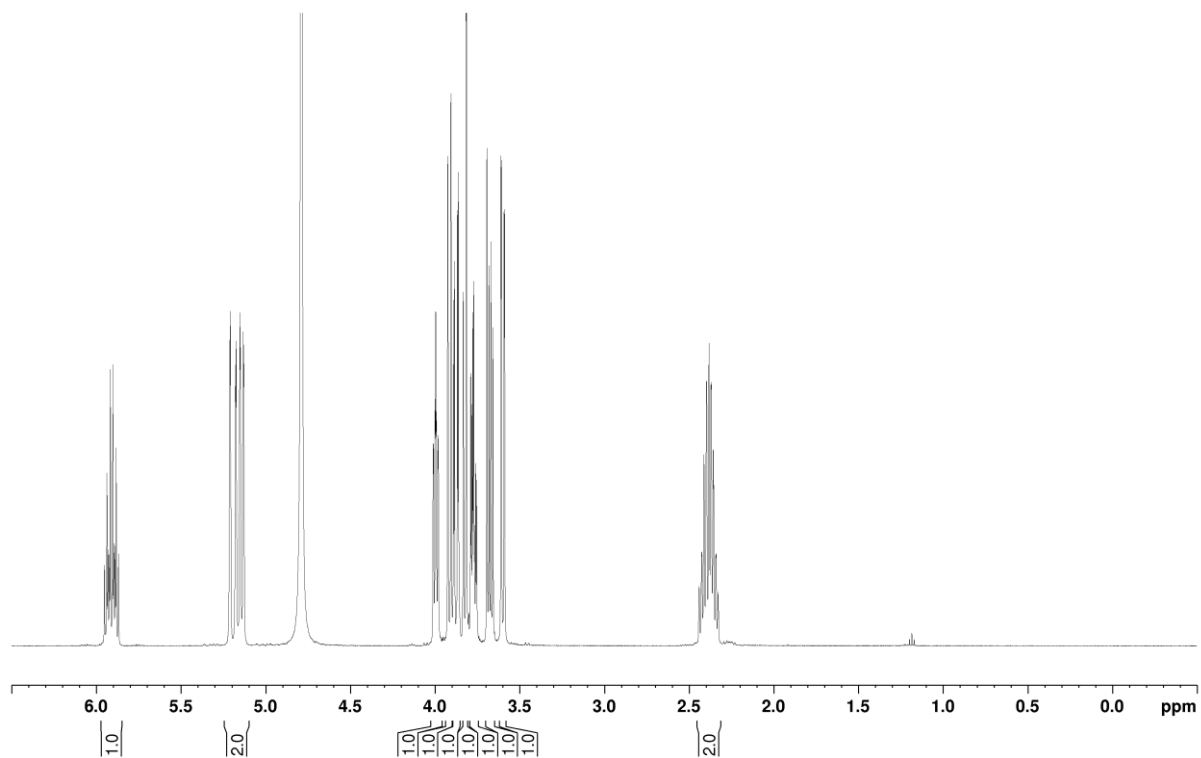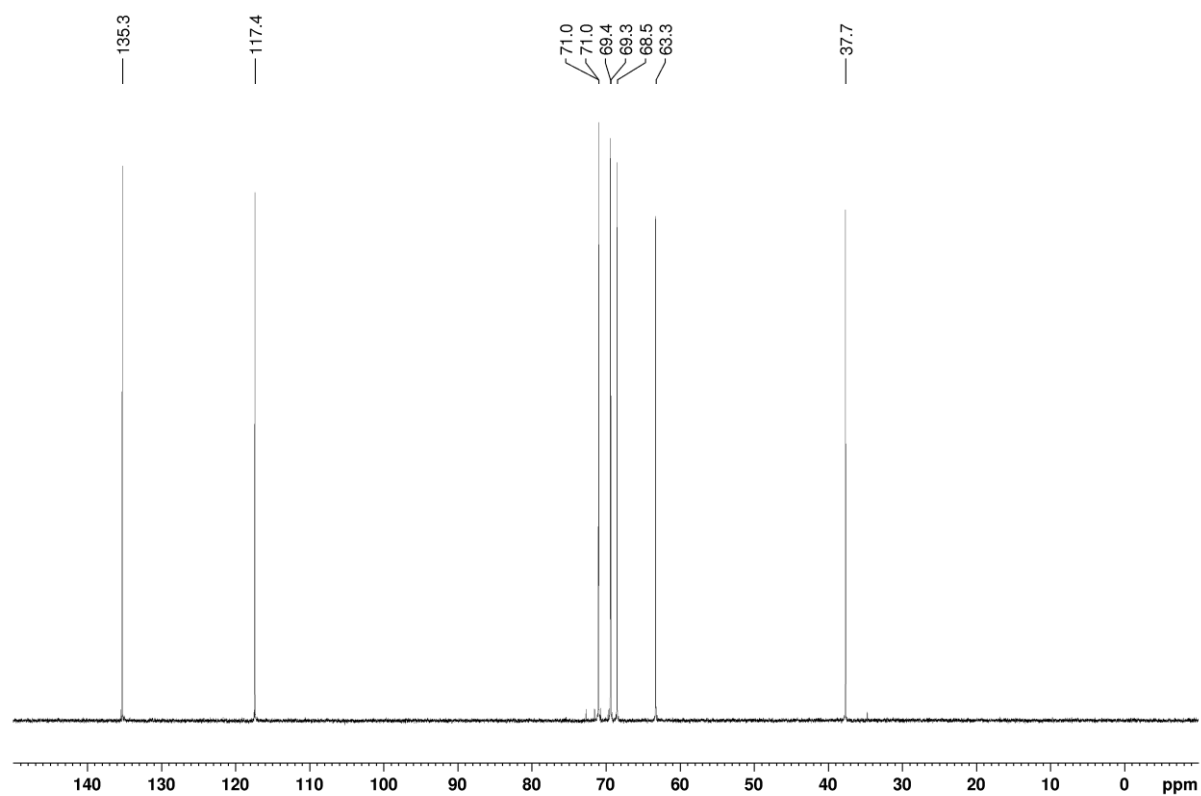

$^1\text{H}$ - and  $^{13}\text{C}$  NMR spectra of compound *t*-Glc\*

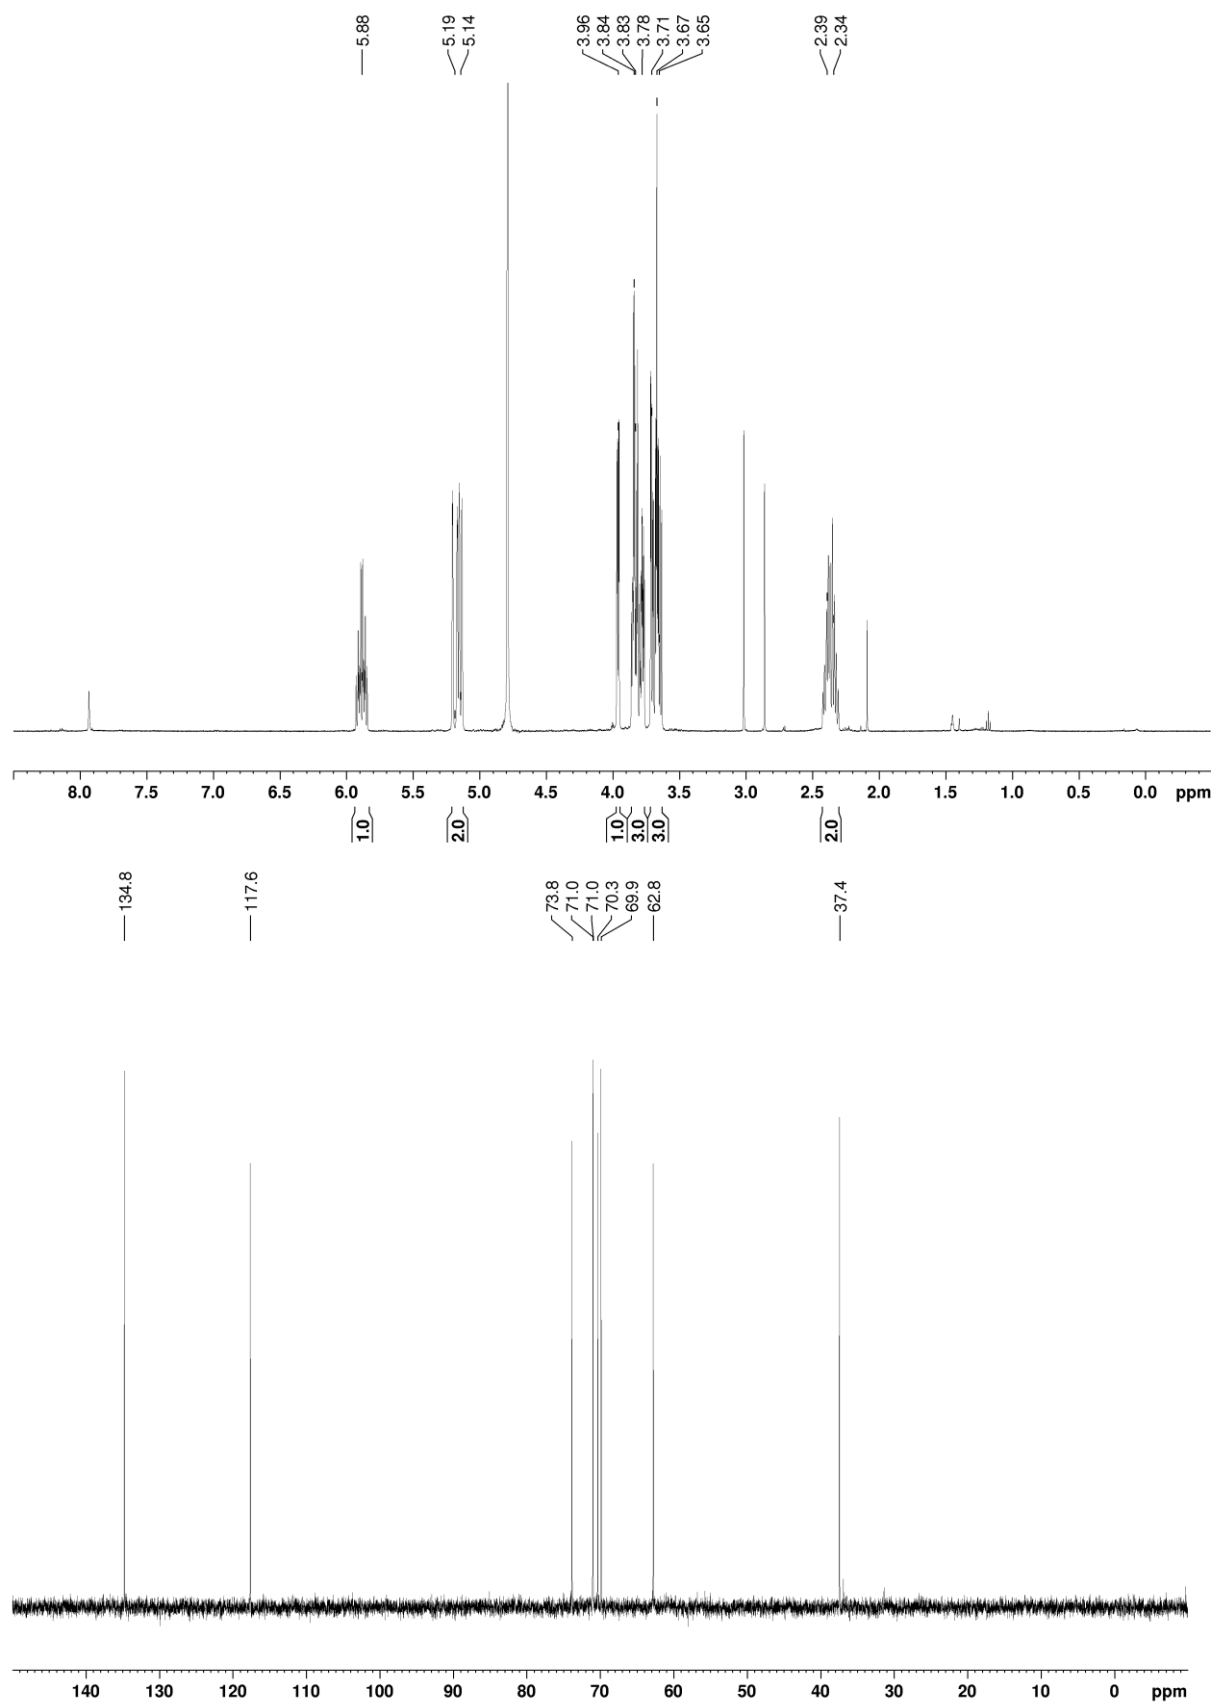

$^1\text{H}$ - and  $^{13}\text{C}$  NMR spectra of compound *e*-Glc\*

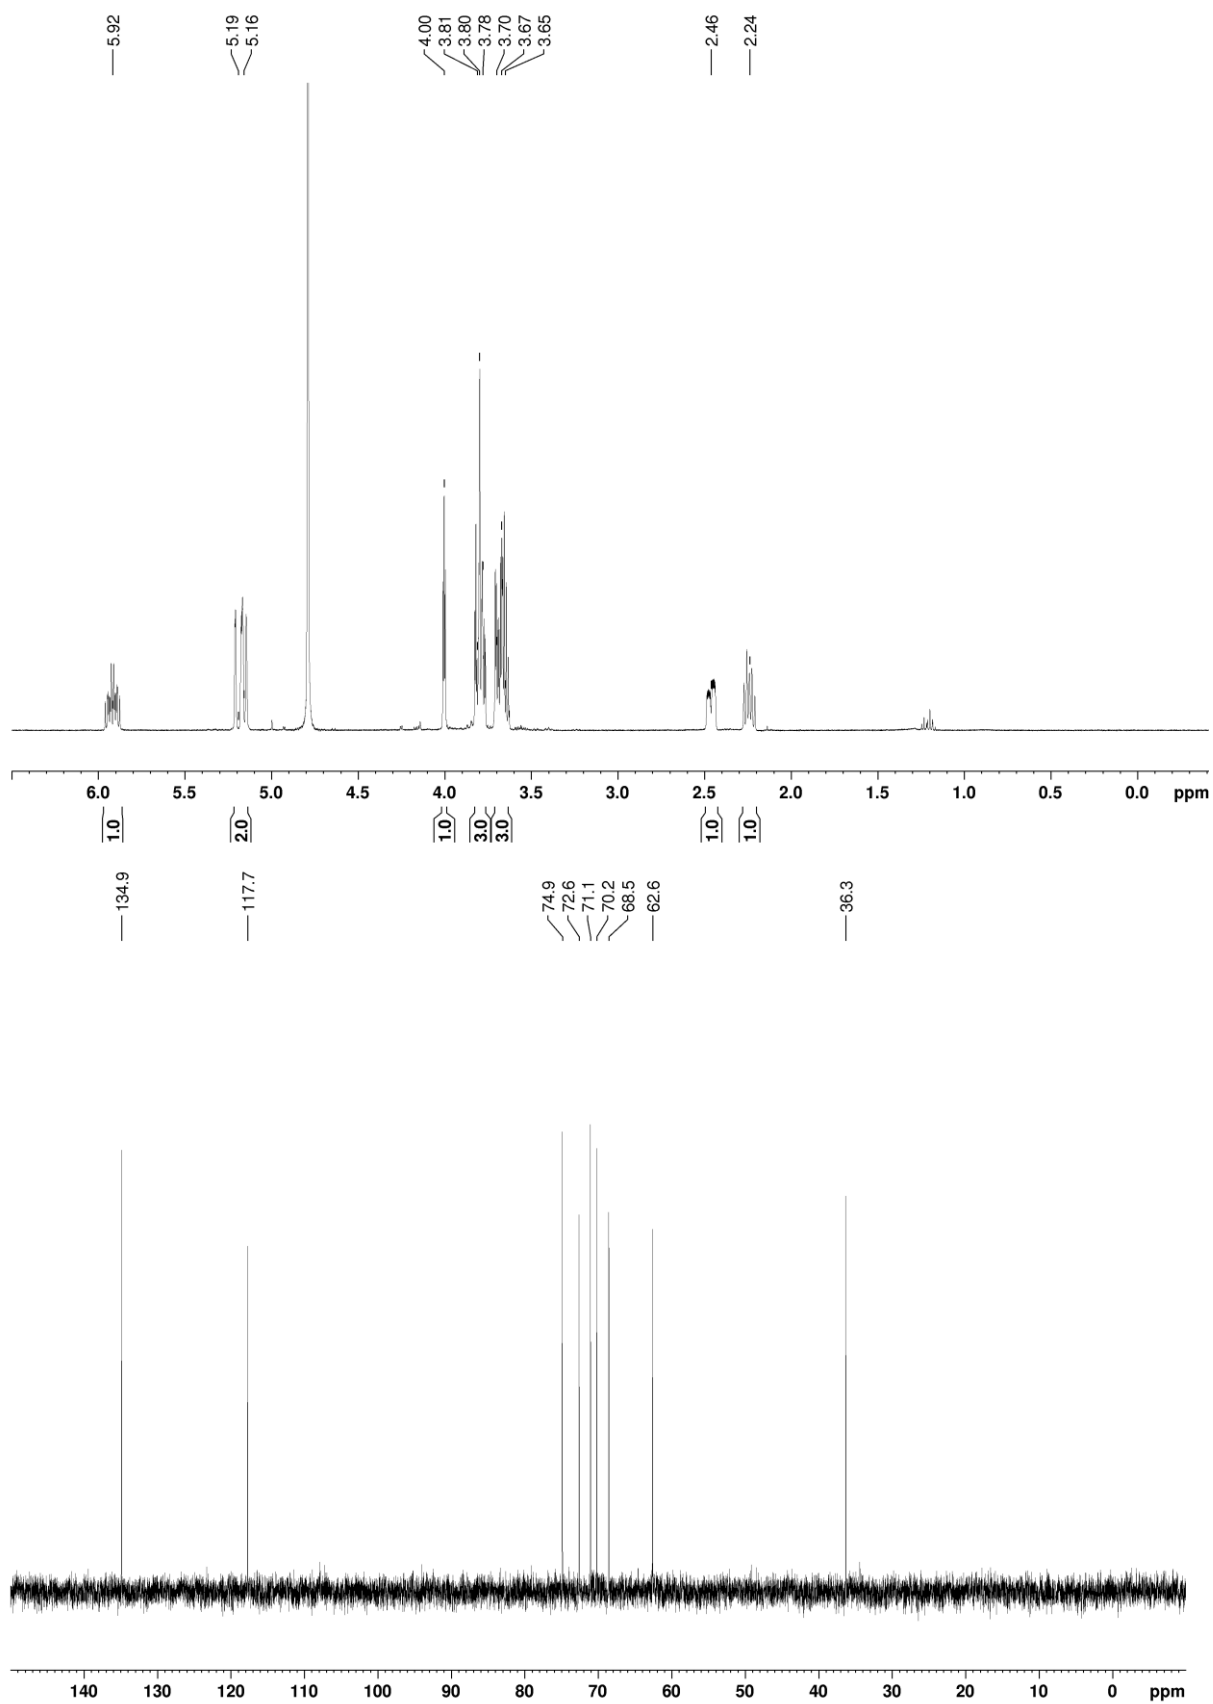



$^1\text{H}$ - and  $^{13}\text{C}$  NMR spectra of compound *t*-Gal\*

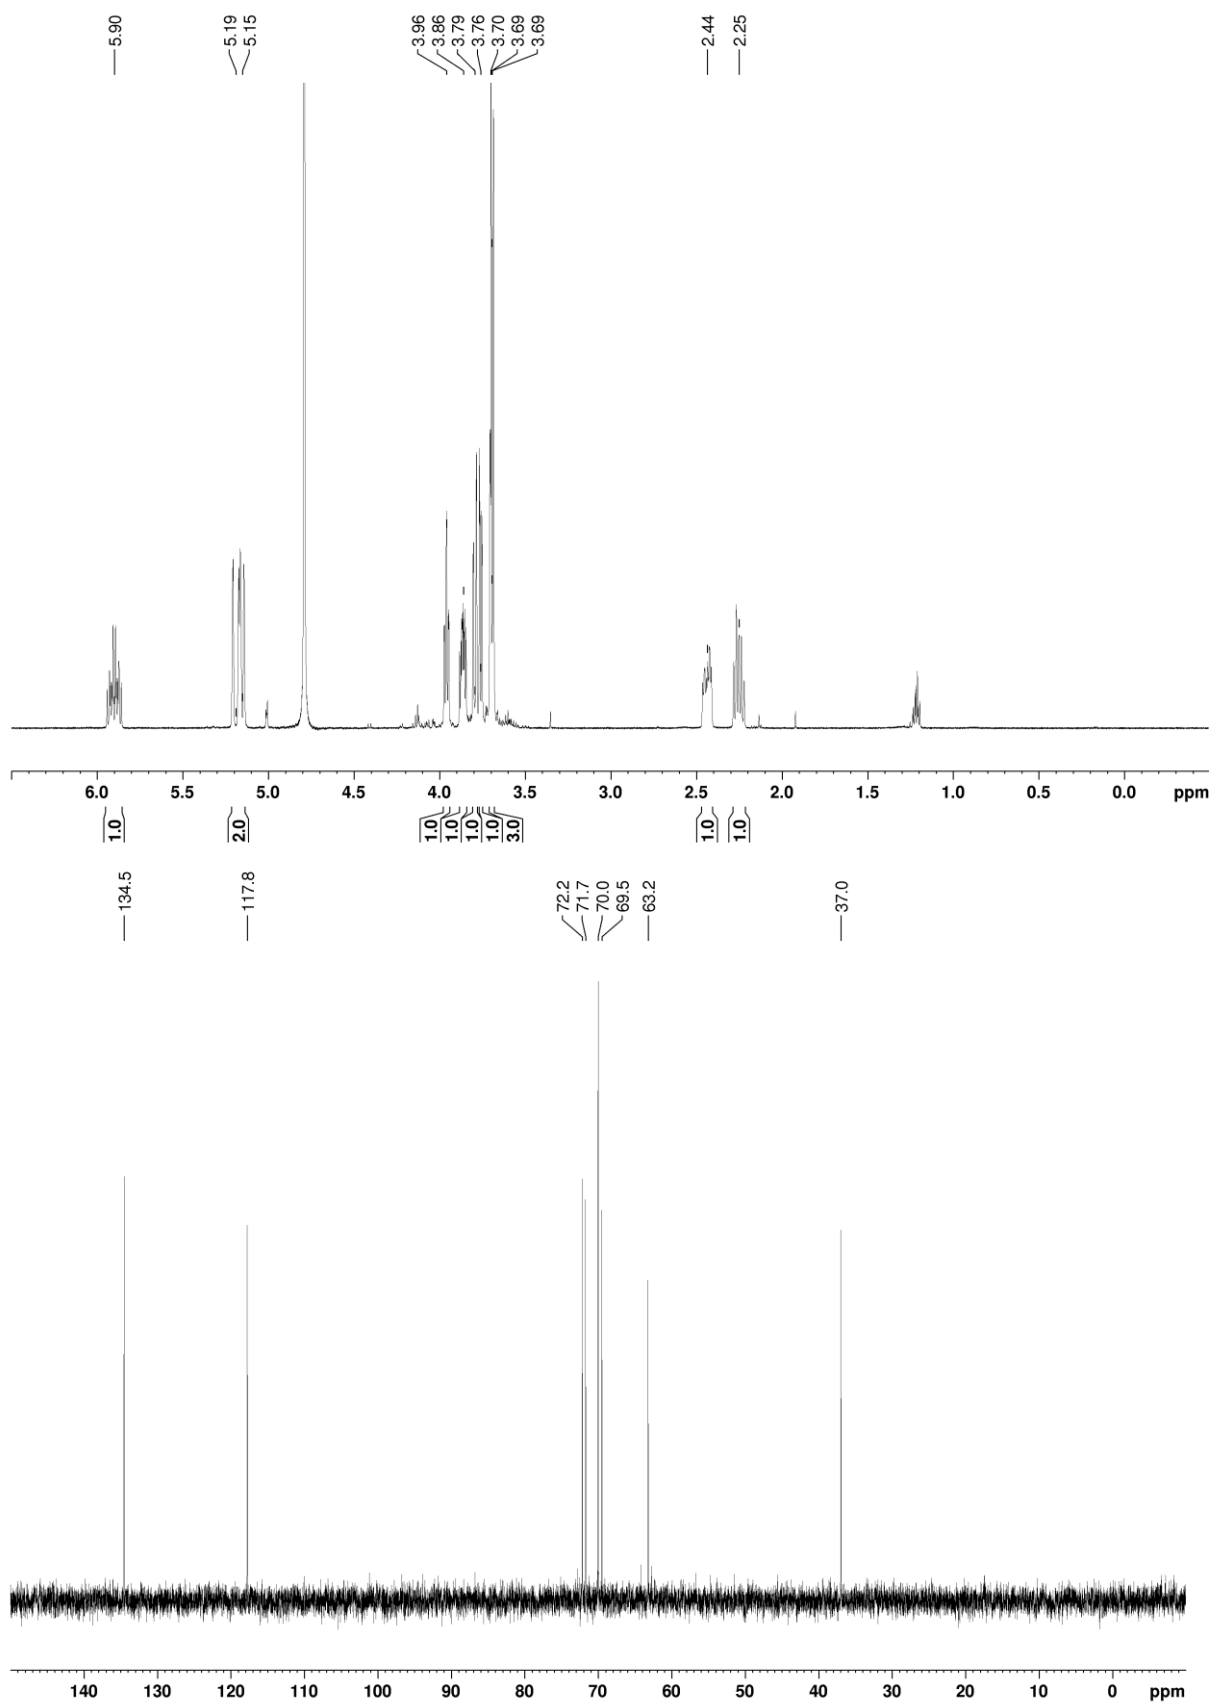

$^1\text{H}$ - and  $^{13}\text{C}$  NMR spectra of compound *e*-Gal\*

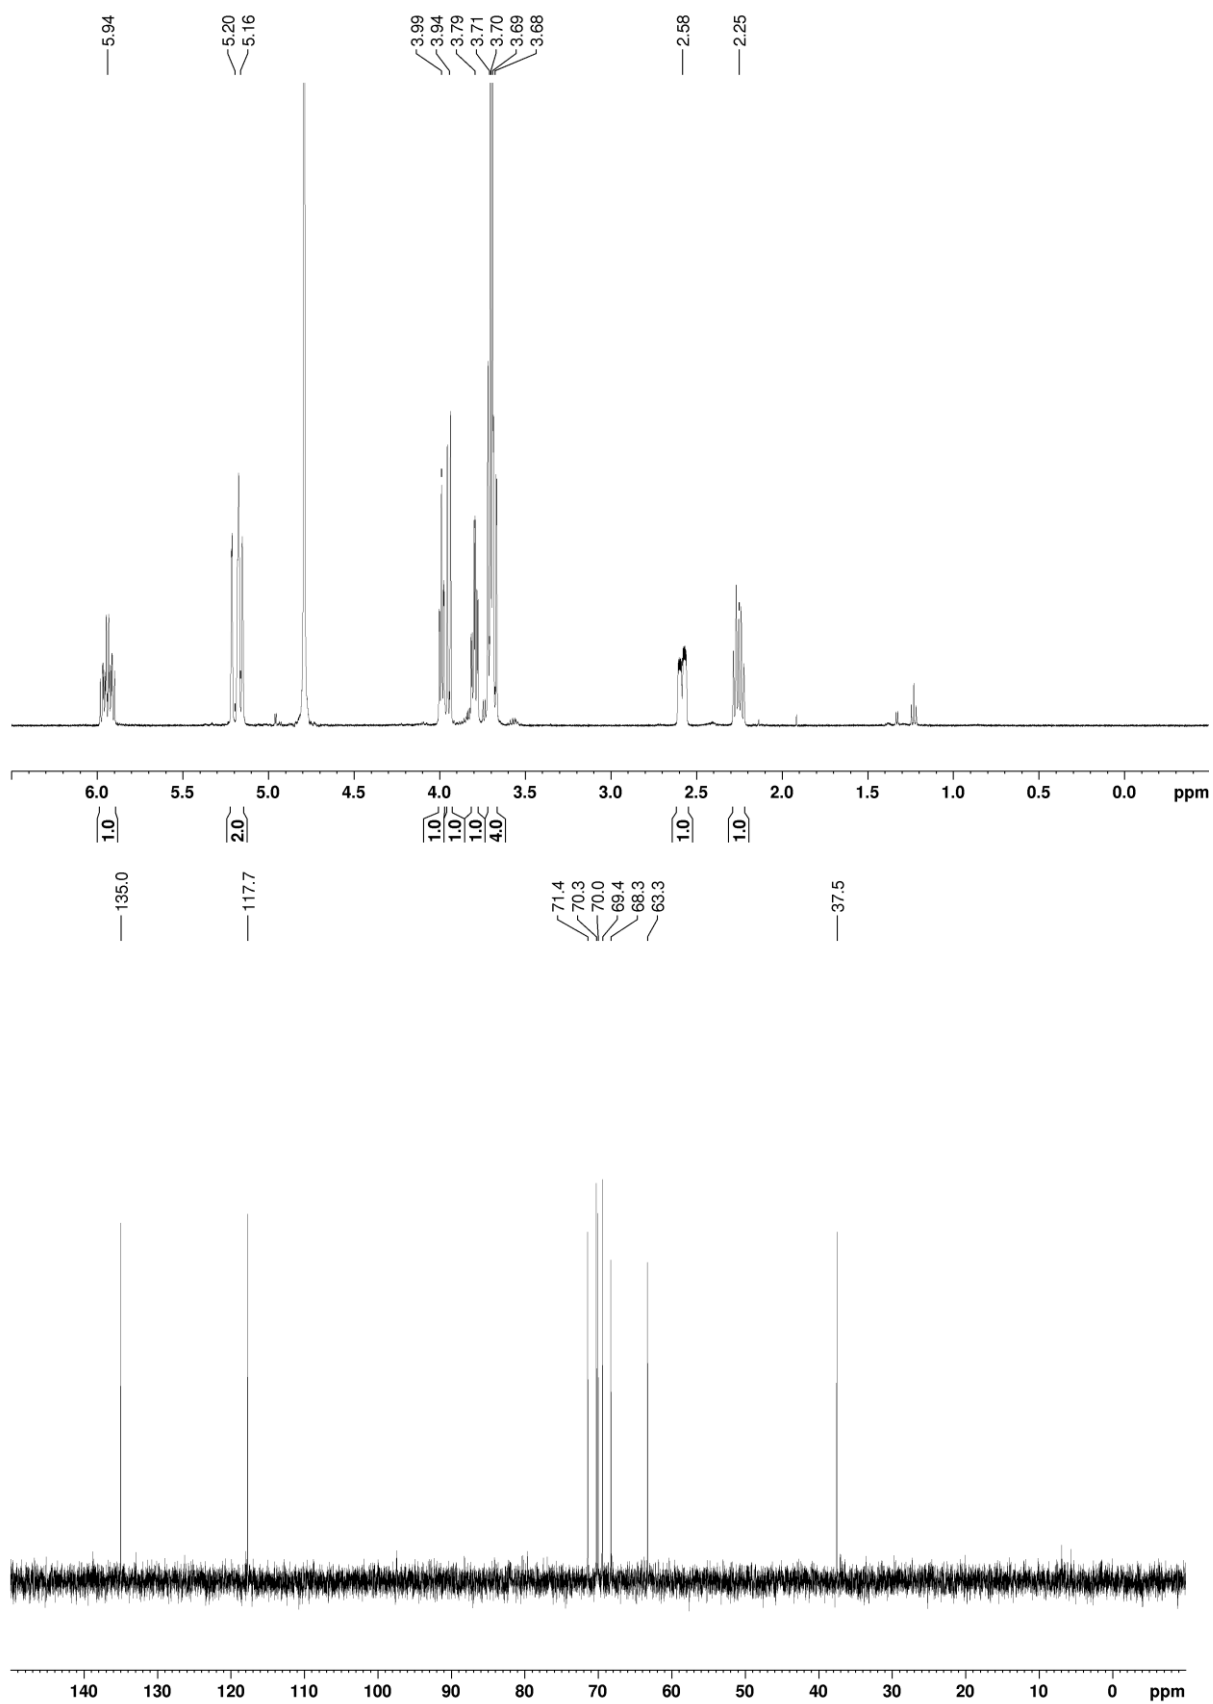

$^1\text{H}$ -and  $^{13}\text{C}$  NMR spectra of compound *t*-Ara\*

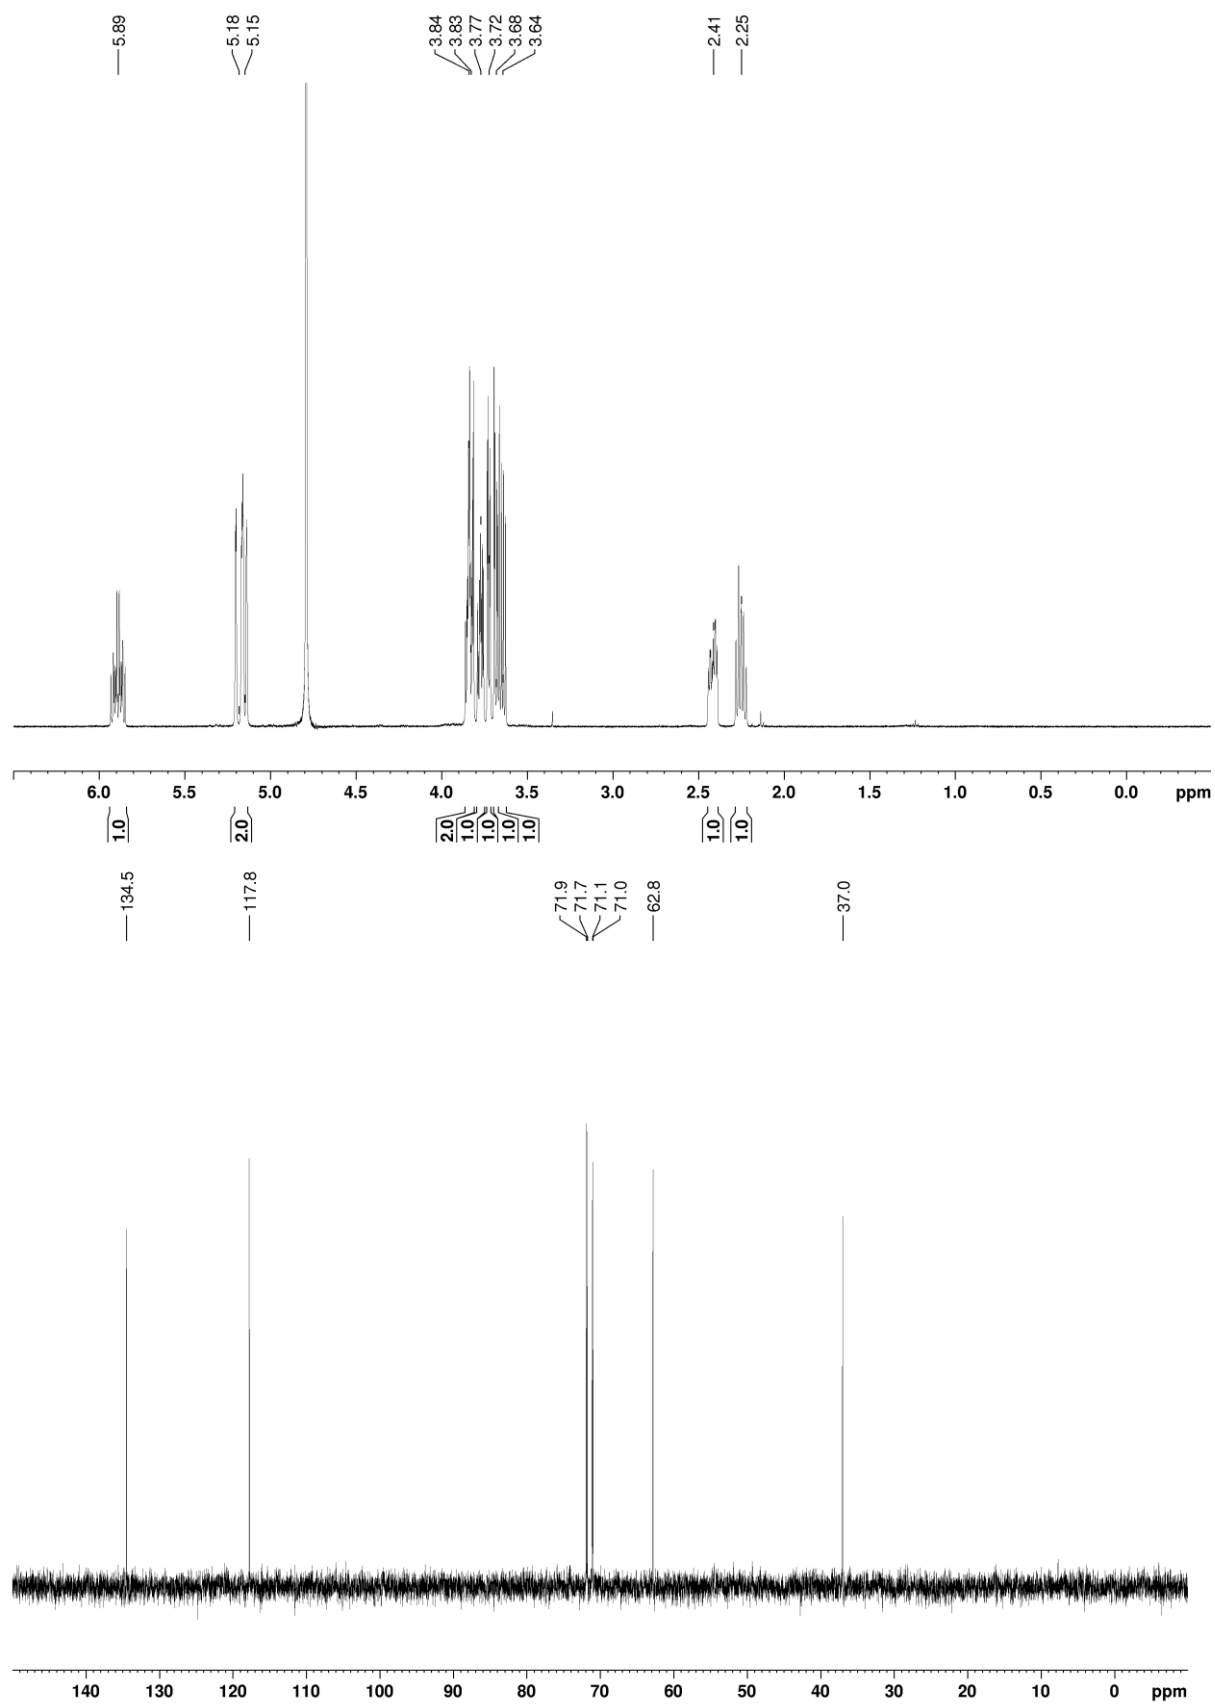

$^1\text{H}$ - and  $^{13}\text{C}$  NMR spectra of compound *e*-Ara\*

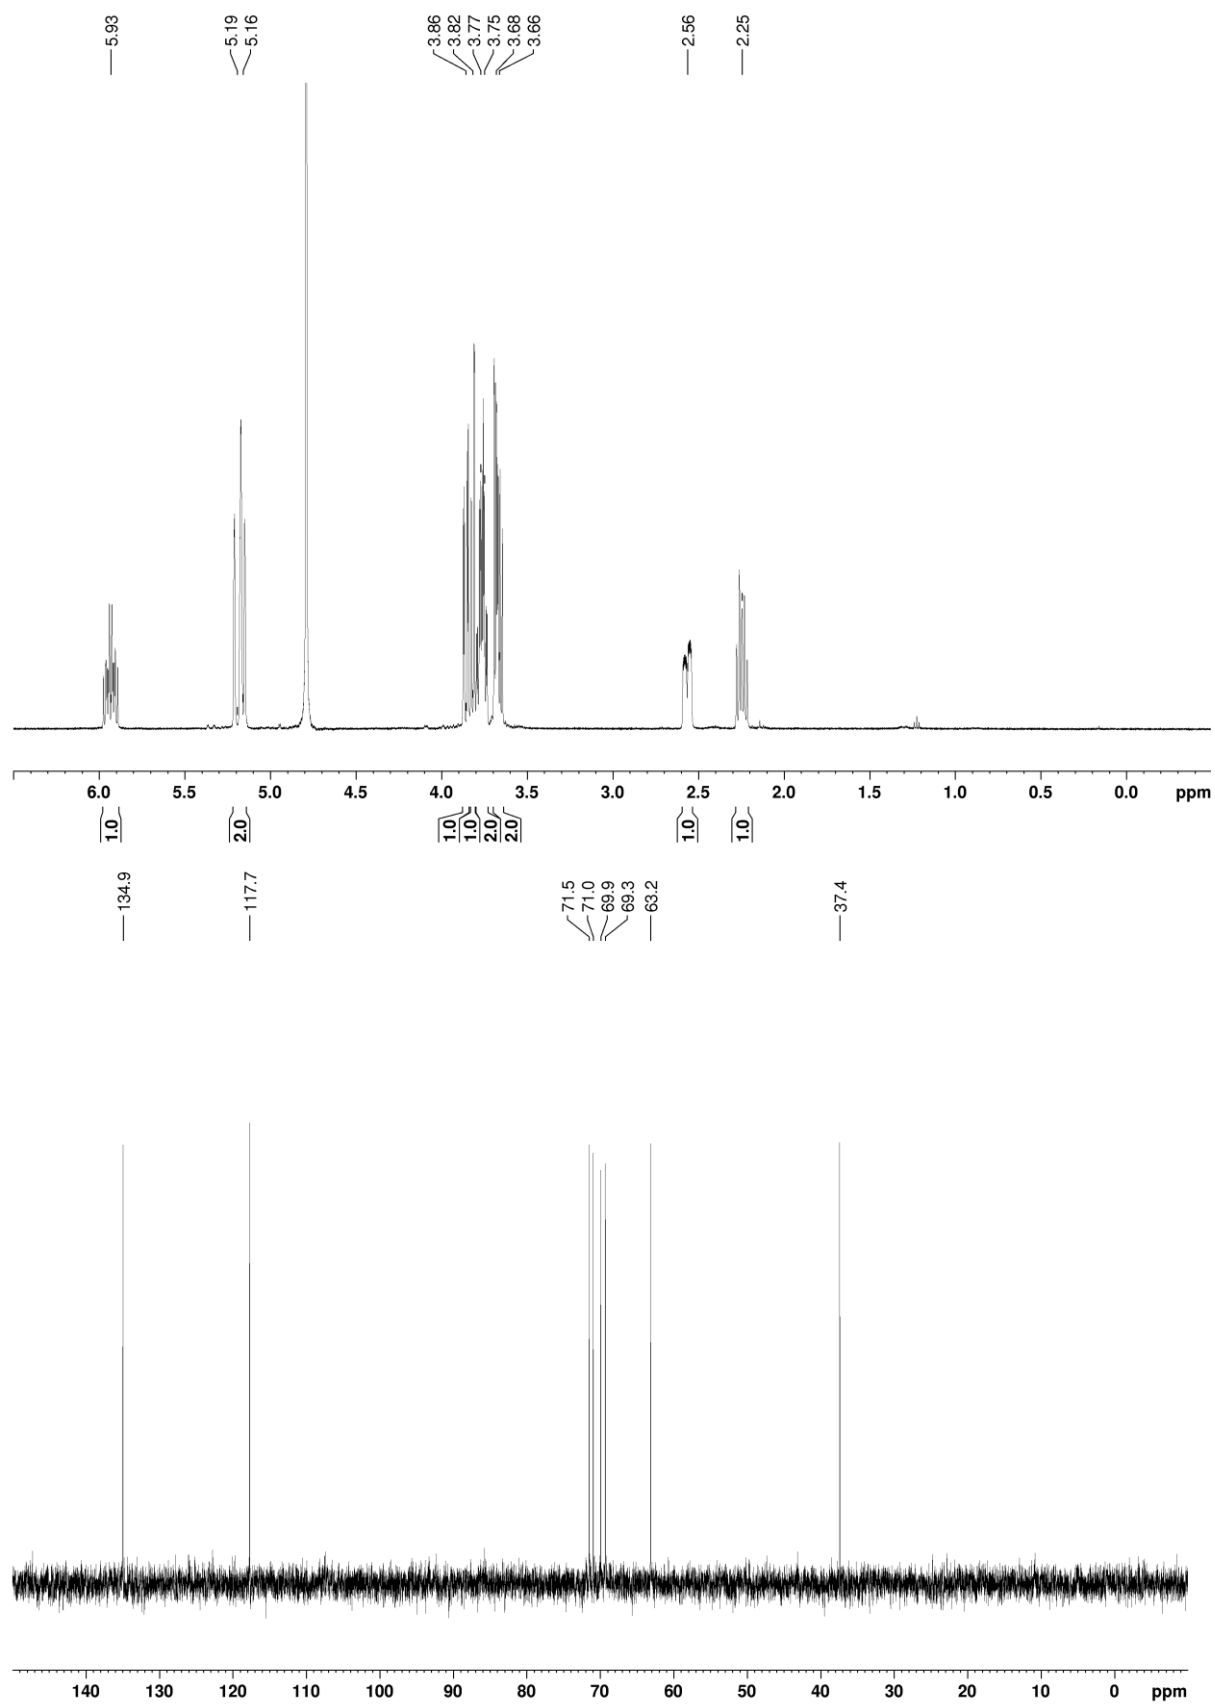

$^1\text{H}$ - and  $^{13}\text{C}$  NMR spectra of compound *t*-Rha\*

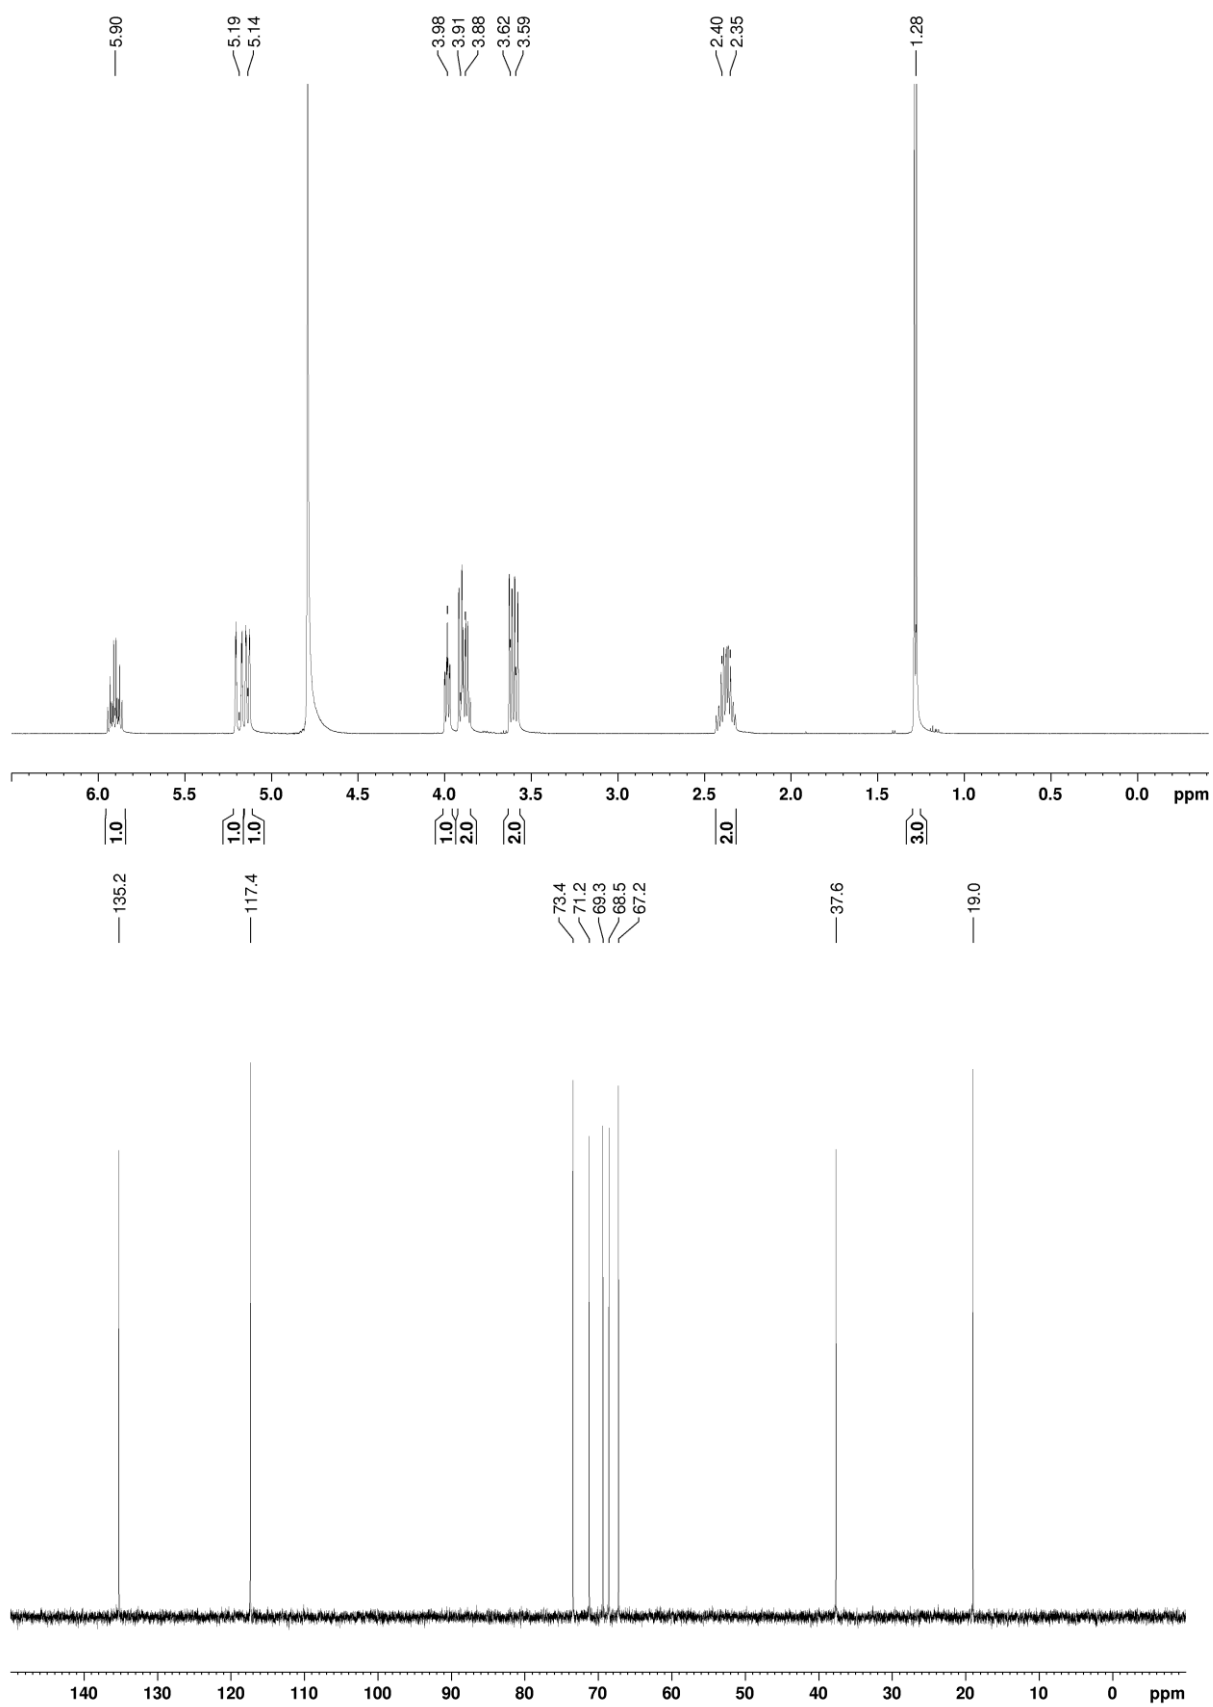

$^1\text{H}$ - and  $^{13}\text{C}$  NMR spectra of compound *t*-Man\*-SC6

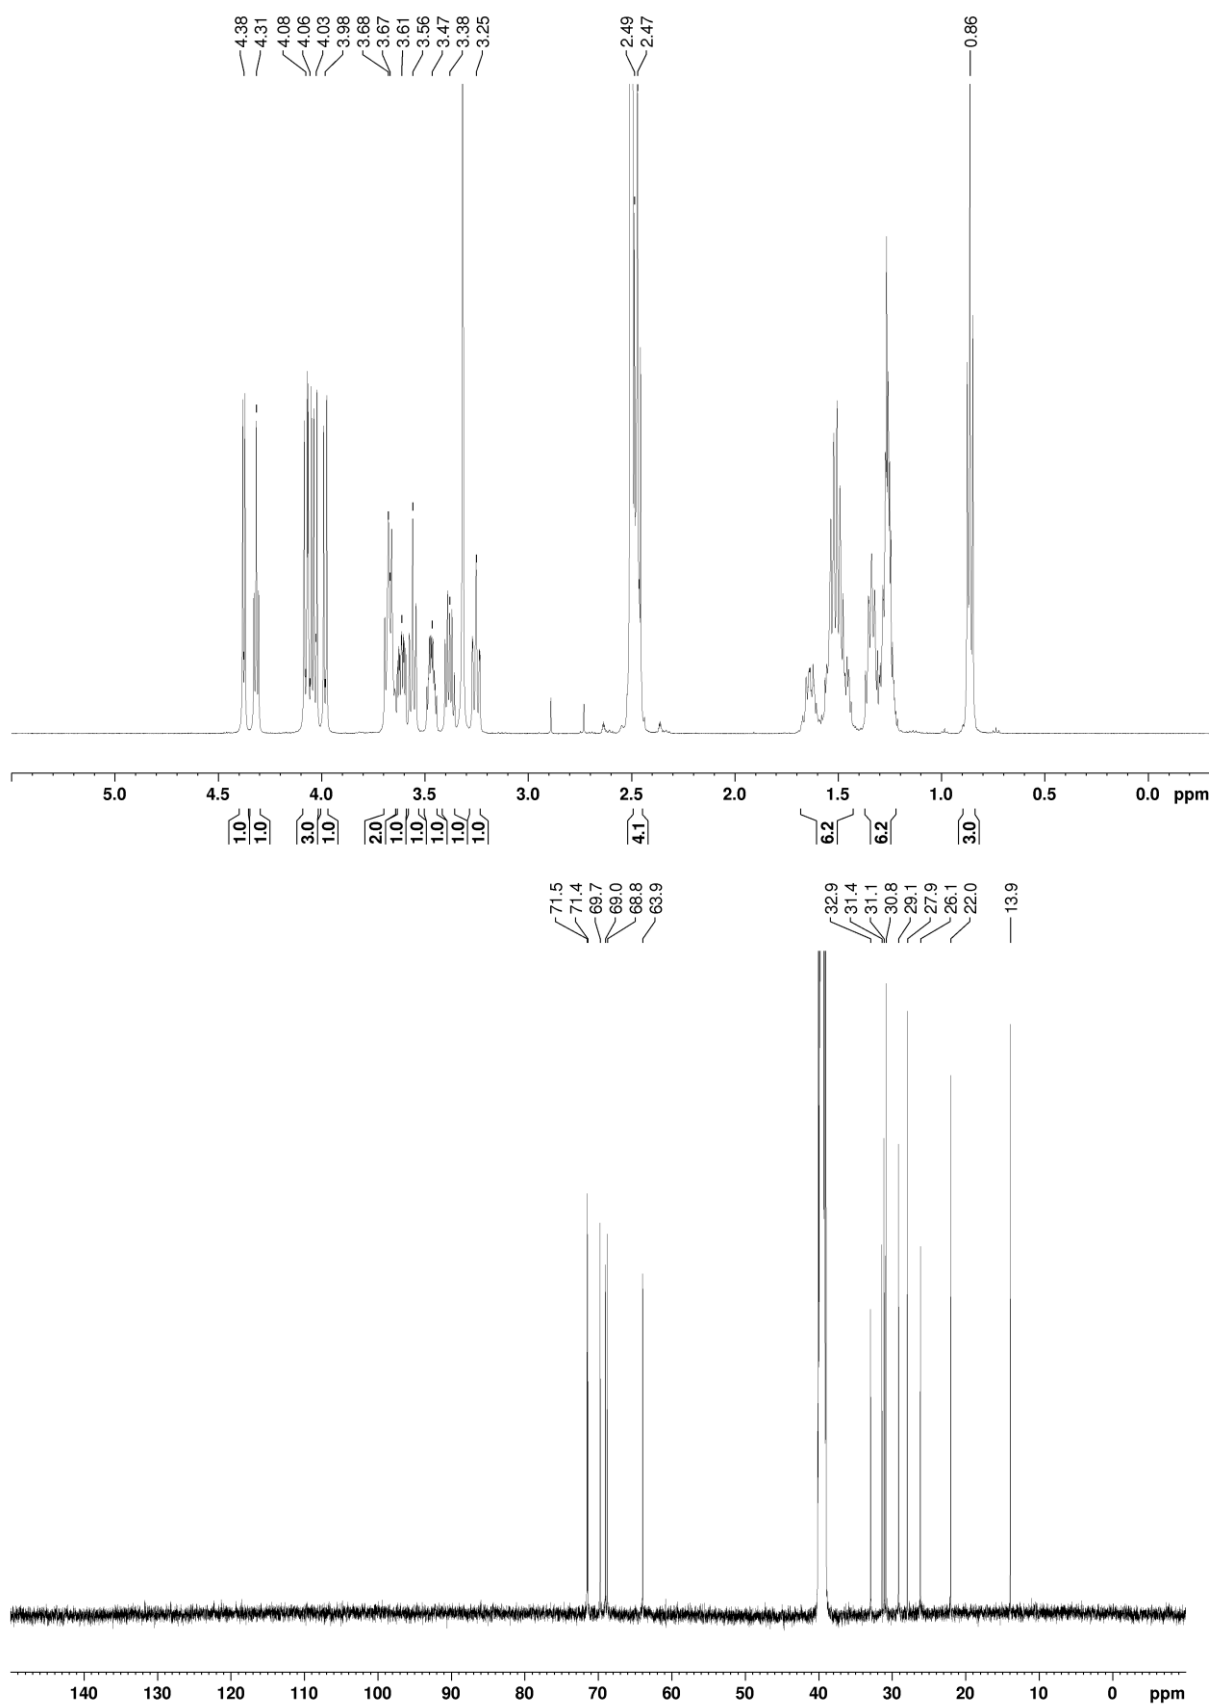

$^1\text{H}$ - and  $^{13}\text{C}$  NMR spectra of compound *t*-Man\*-SC10

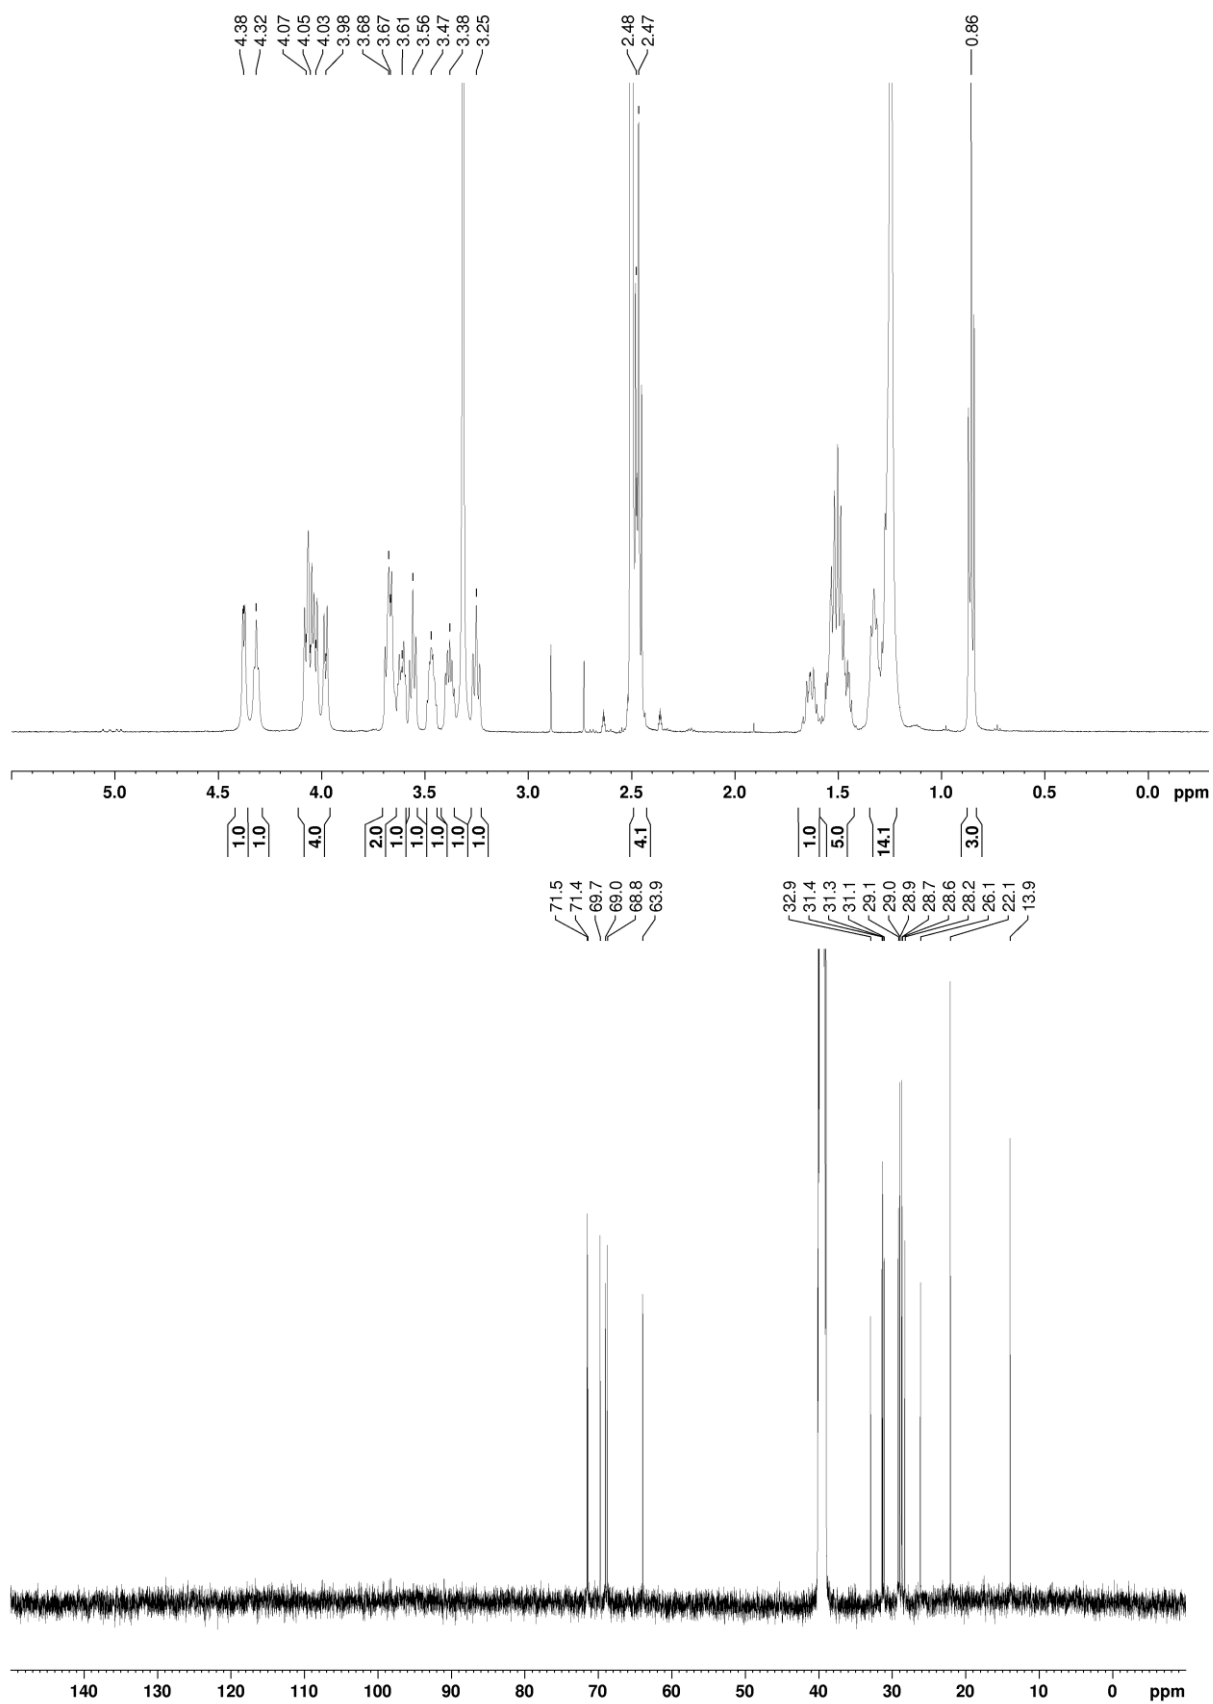

$^1\text{H}$ - and  $^{13}\text{C}$  NMR spectra of compound *t*-Man\*-SC14

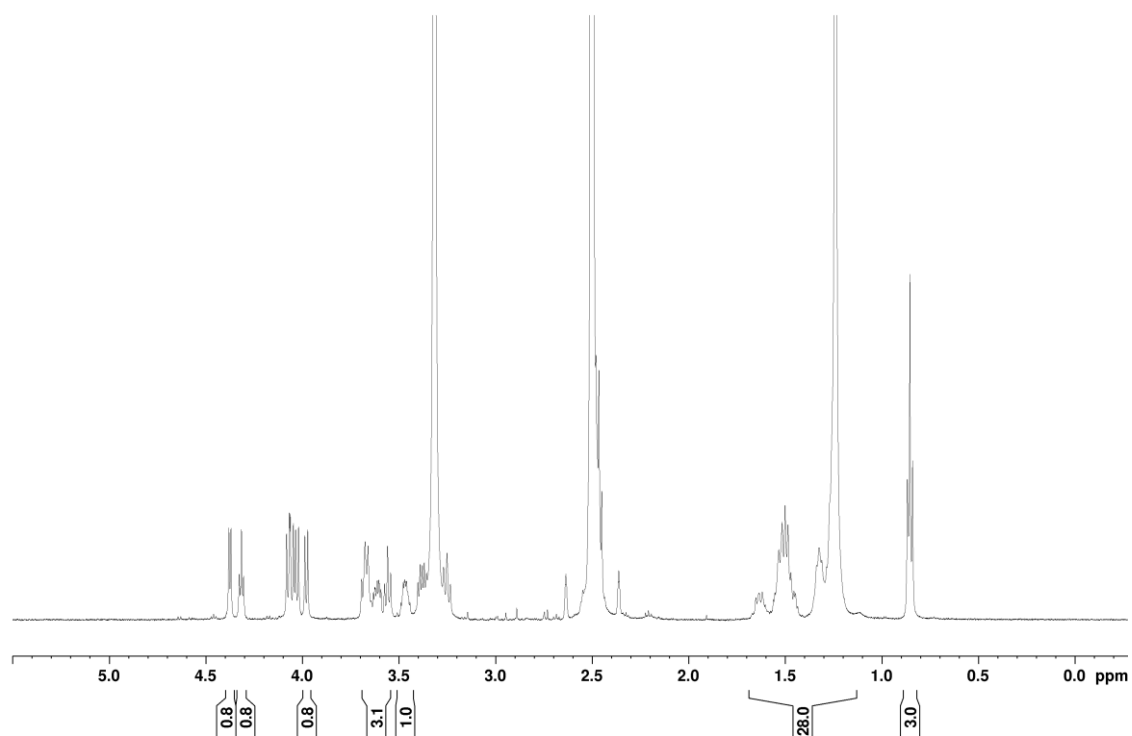

Due to the relatively high water content of this sample (as evidenced by the large signal at approx. 3.3 ppm), and the rapid exchange of the OH-protons with water, the OH-integrals at 4-4.5 ppm appear smaller than expected.

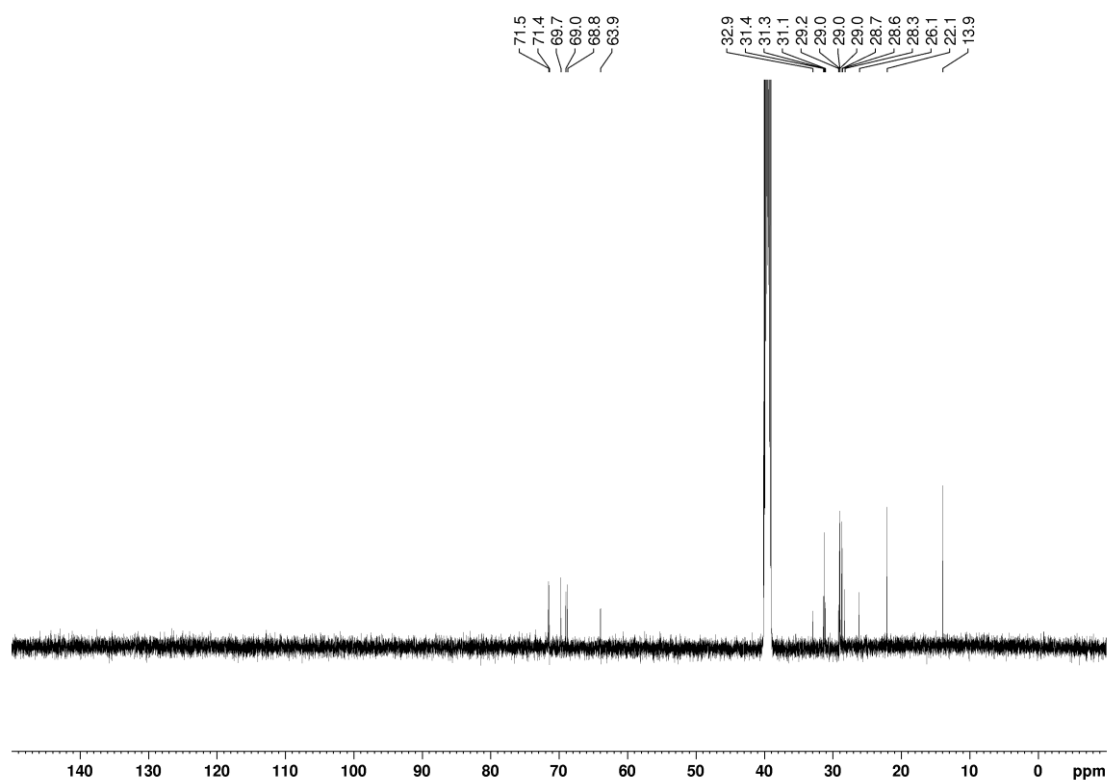



$^1\text{H}$ - and  $^{13}\text{C}$  NMR spectra of compound *t*-Glc\*-SC14

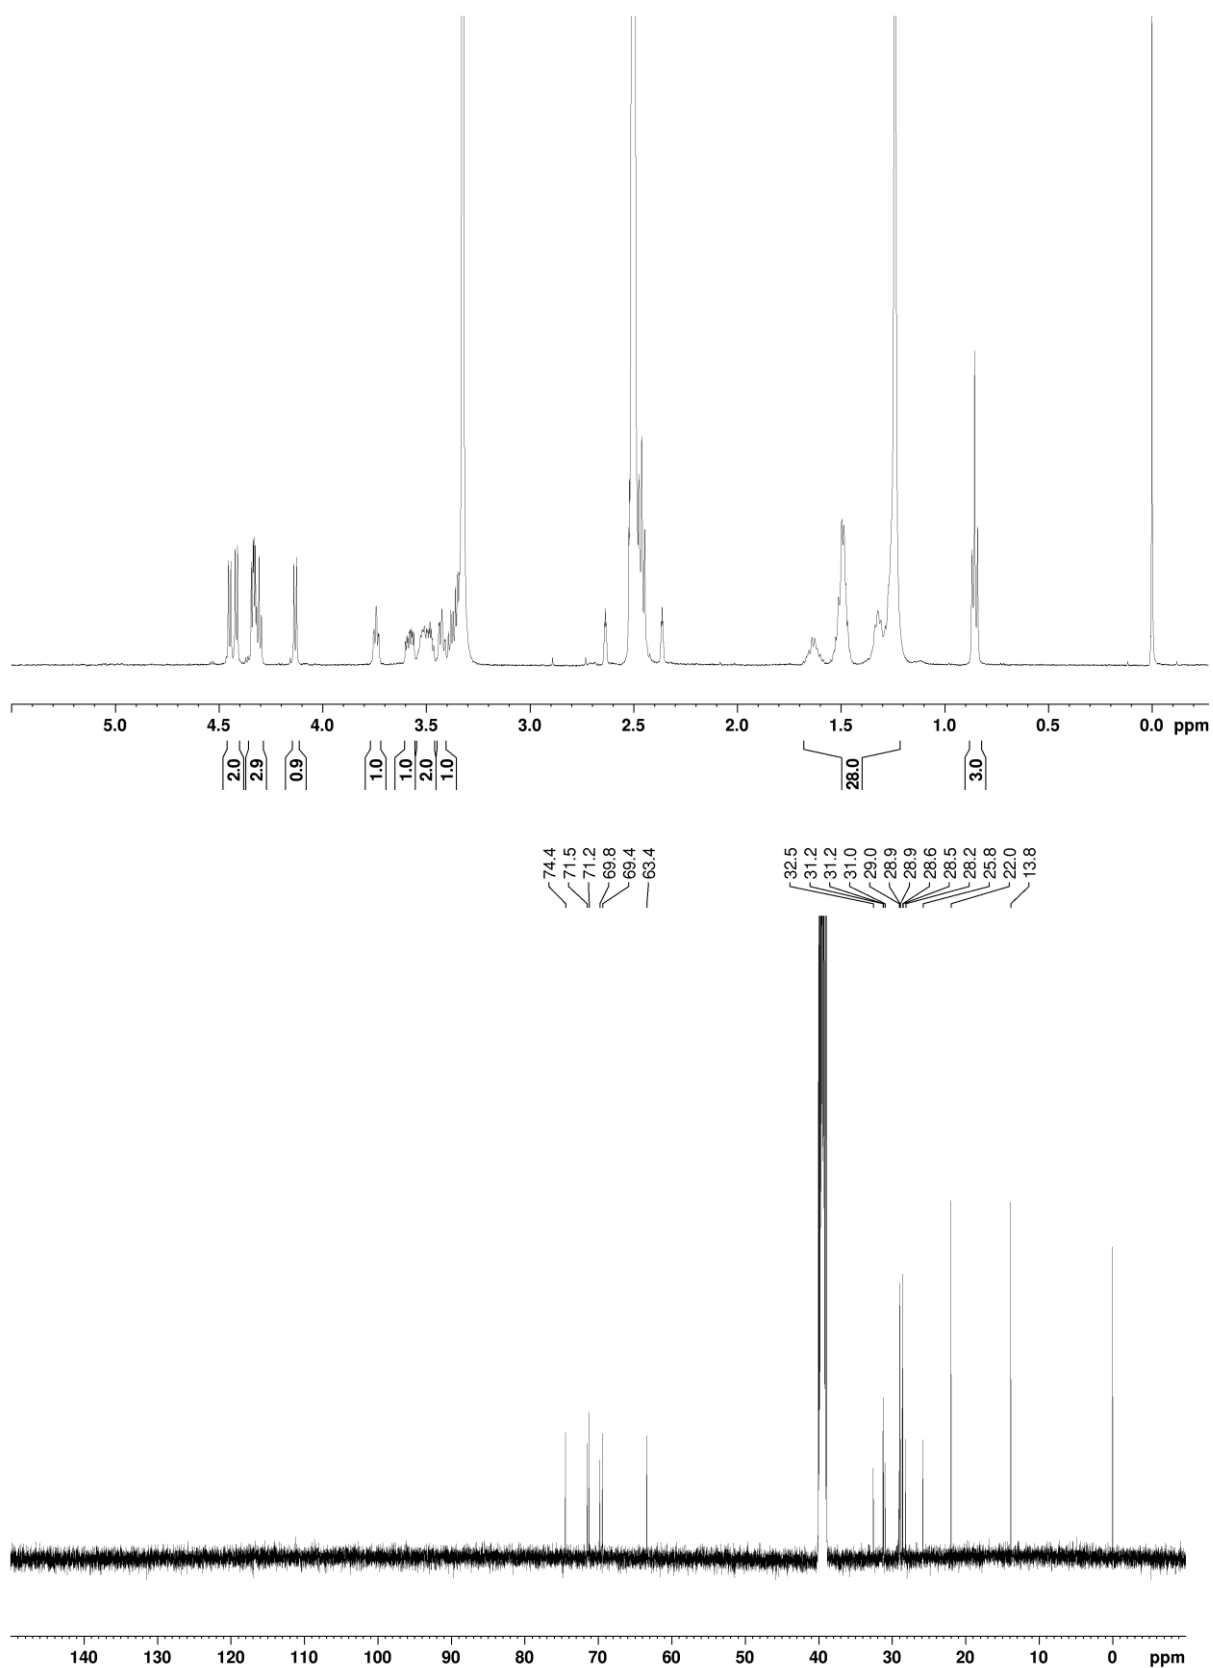

$^1\text{H}$ - and  $^{13}\text{C}$  NMR spectra of compound *e*-Glc\*-SC14

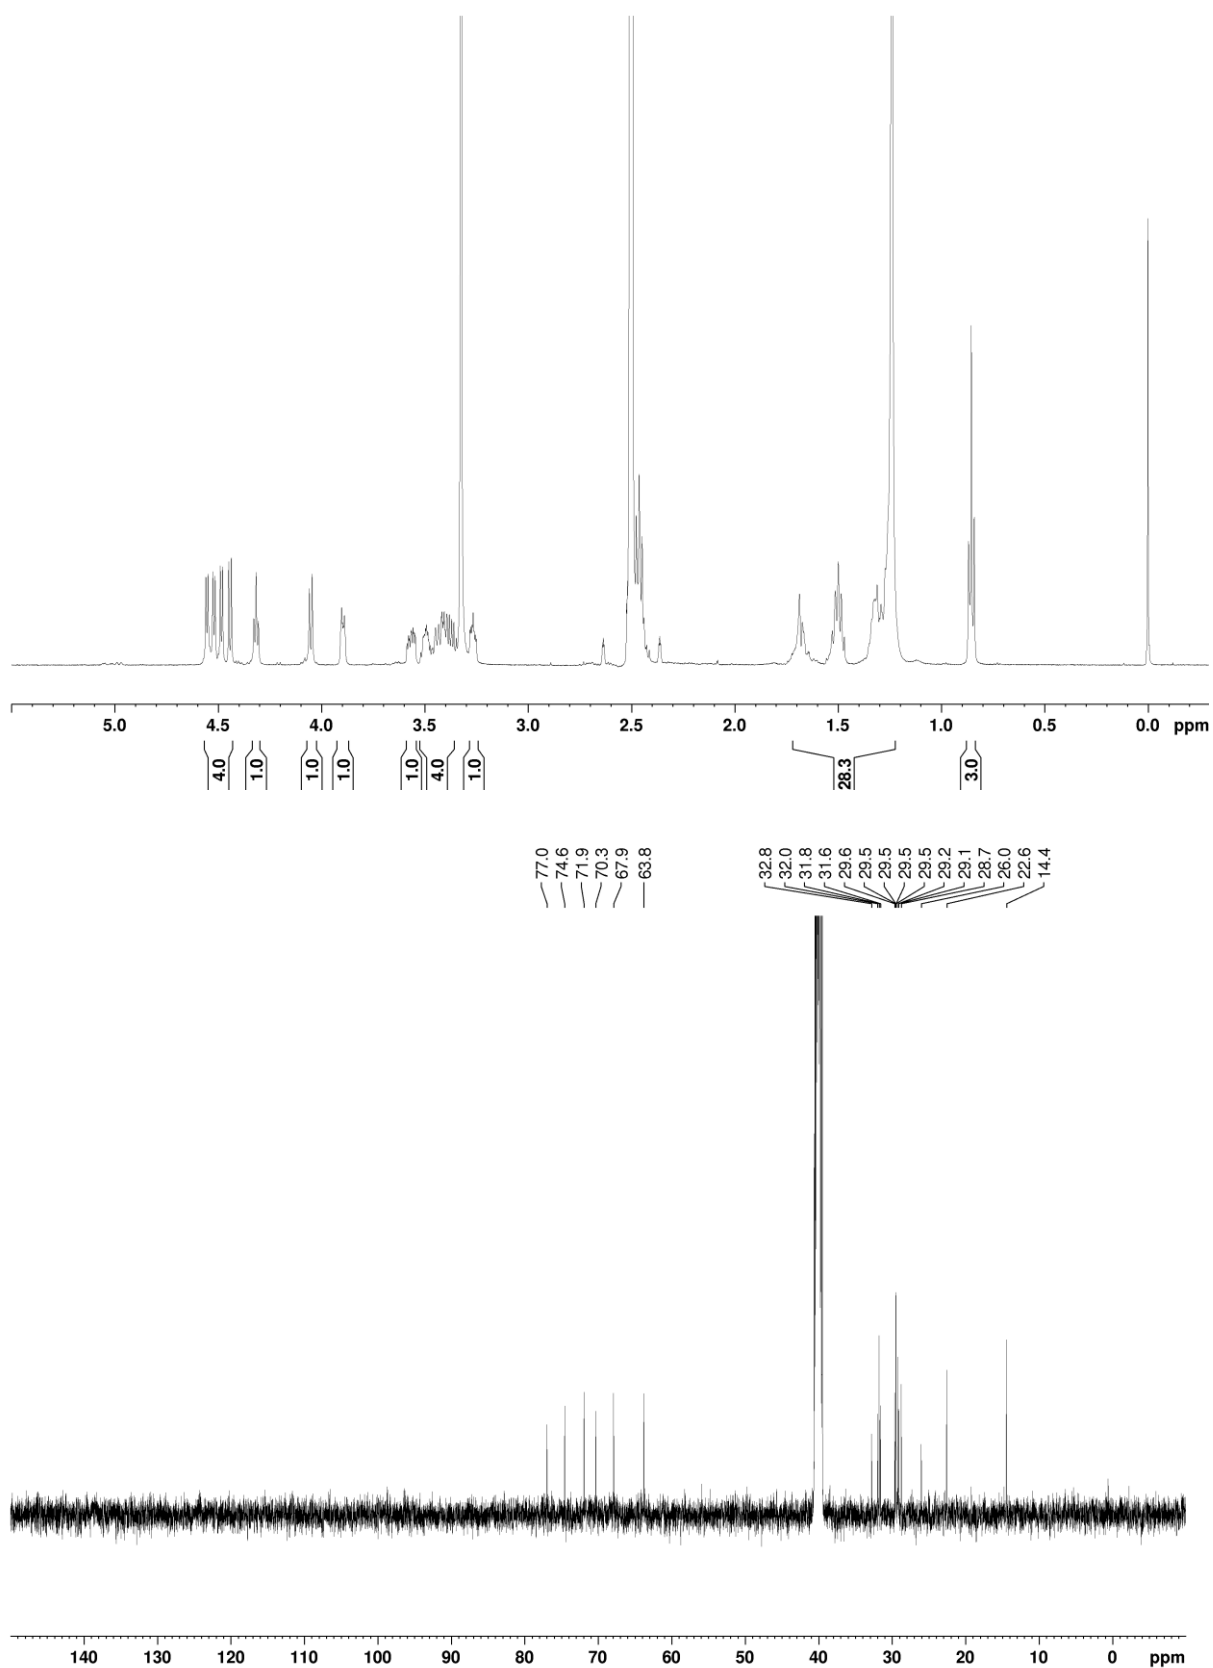

$^1\text{H}$ - and  $^{13}\text{C}$  NMR spectra of compound *t*-Gal\*-SC14

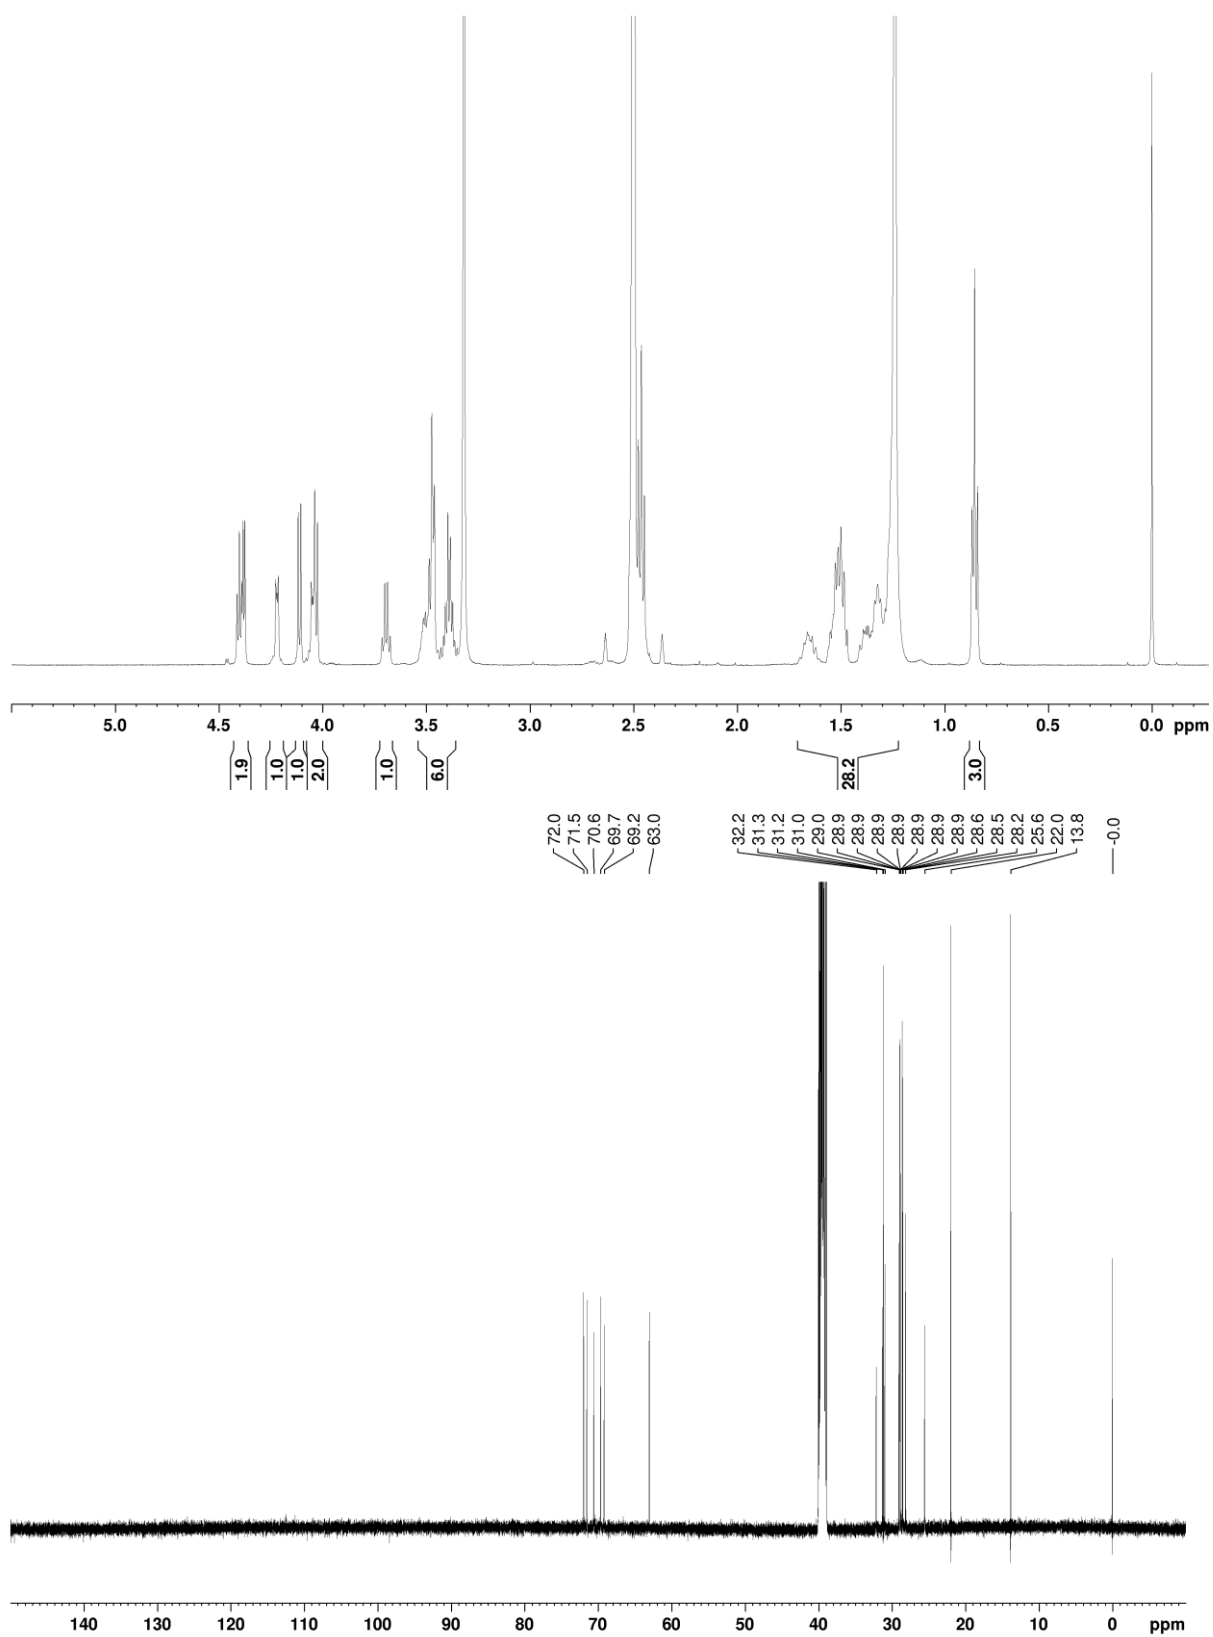

$^1\text{H}$ - and  $^{13}\text{C}$  NMR spectra of compound *e*-Gal\*-SC14

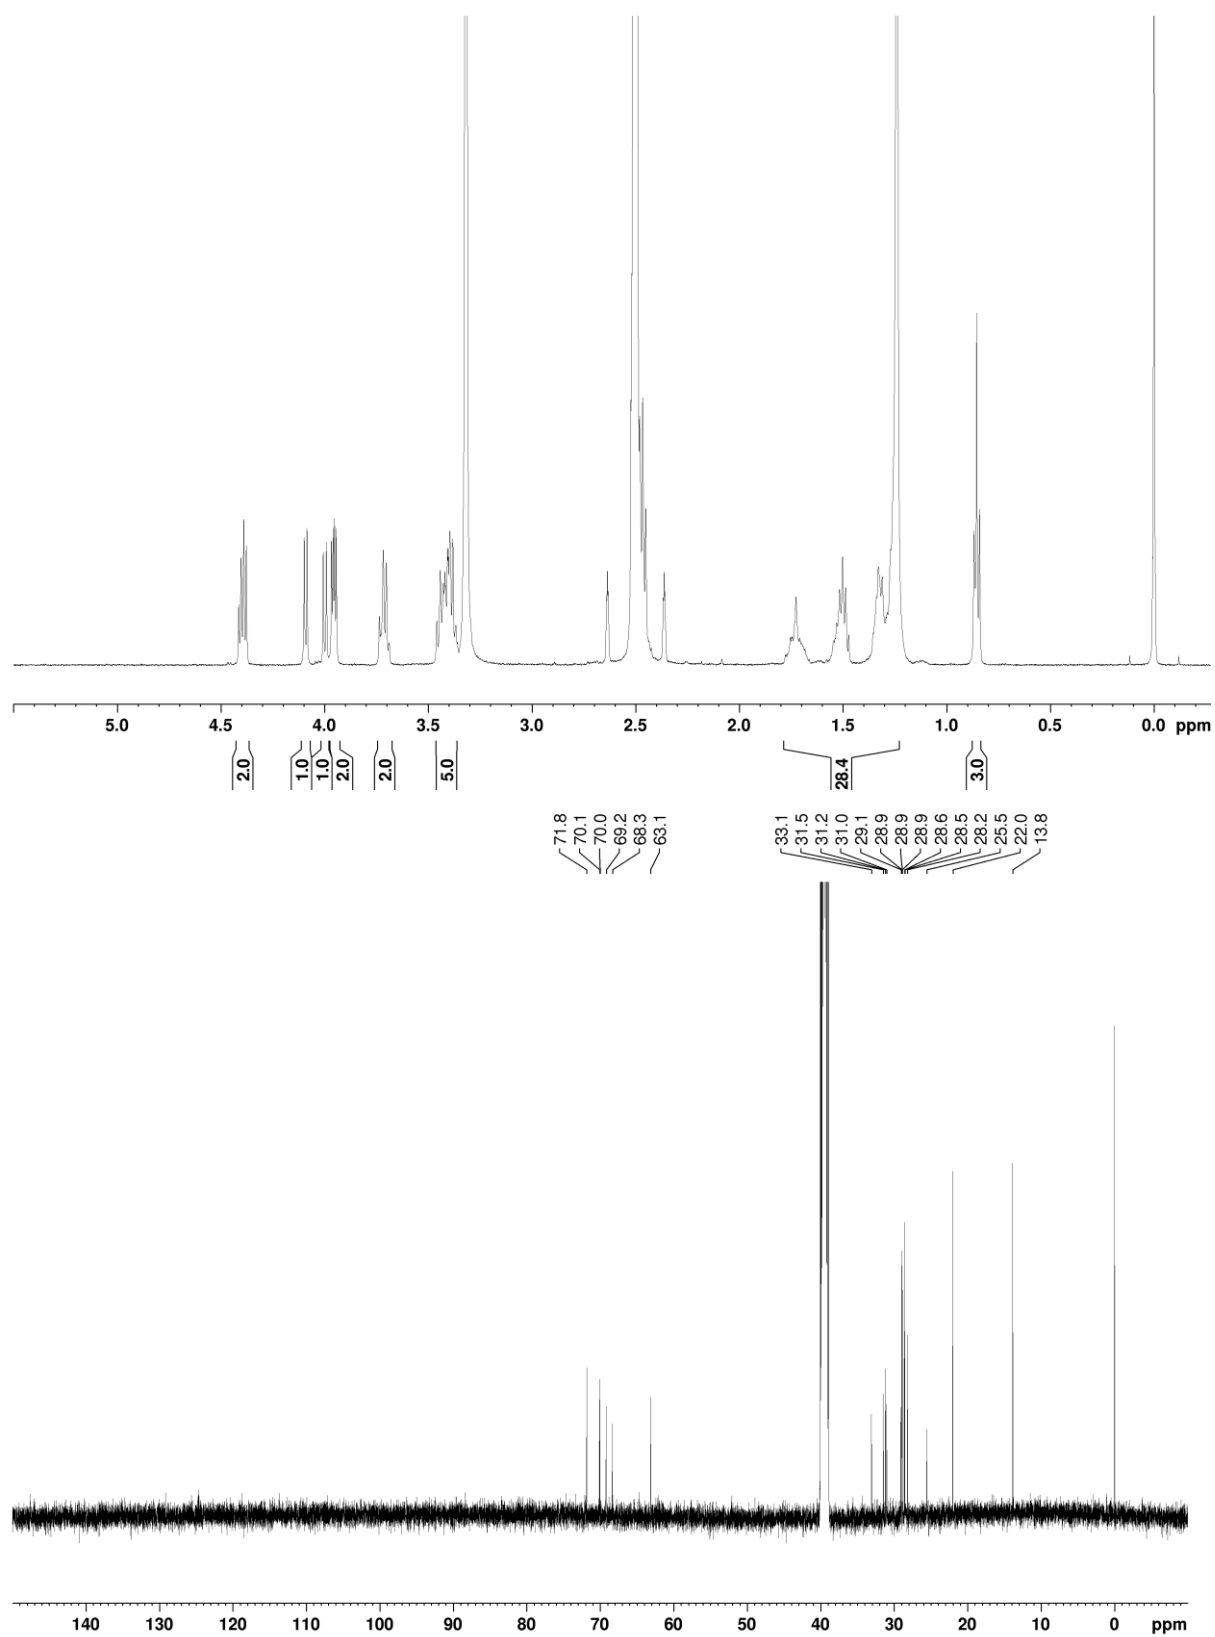

$^1\text{H}$ - and  $^{13}\text{C}$  NMR spectra of compound *t*-Ara\*-SC14

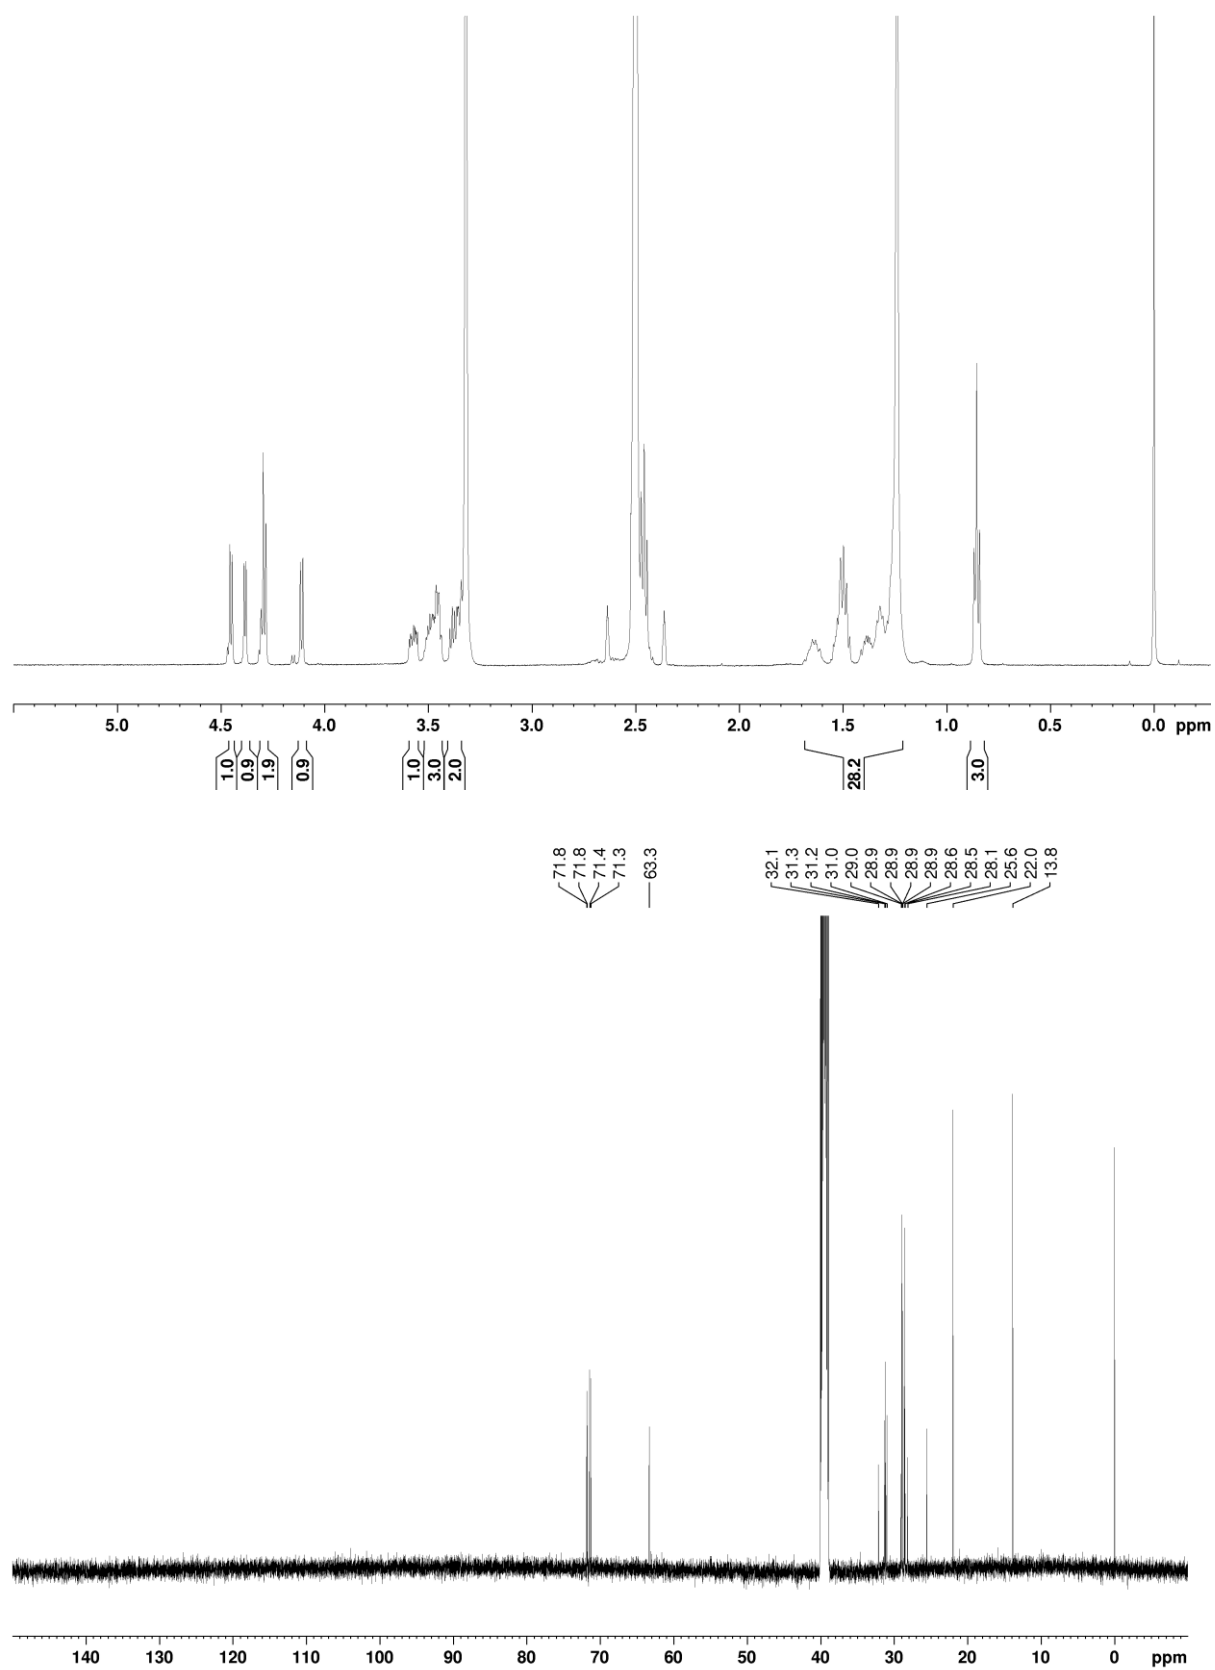

$^1\text{H}$ - and  $^{13}\text{C}$  NMR spectra of compound *e*-Ara\*-SC14

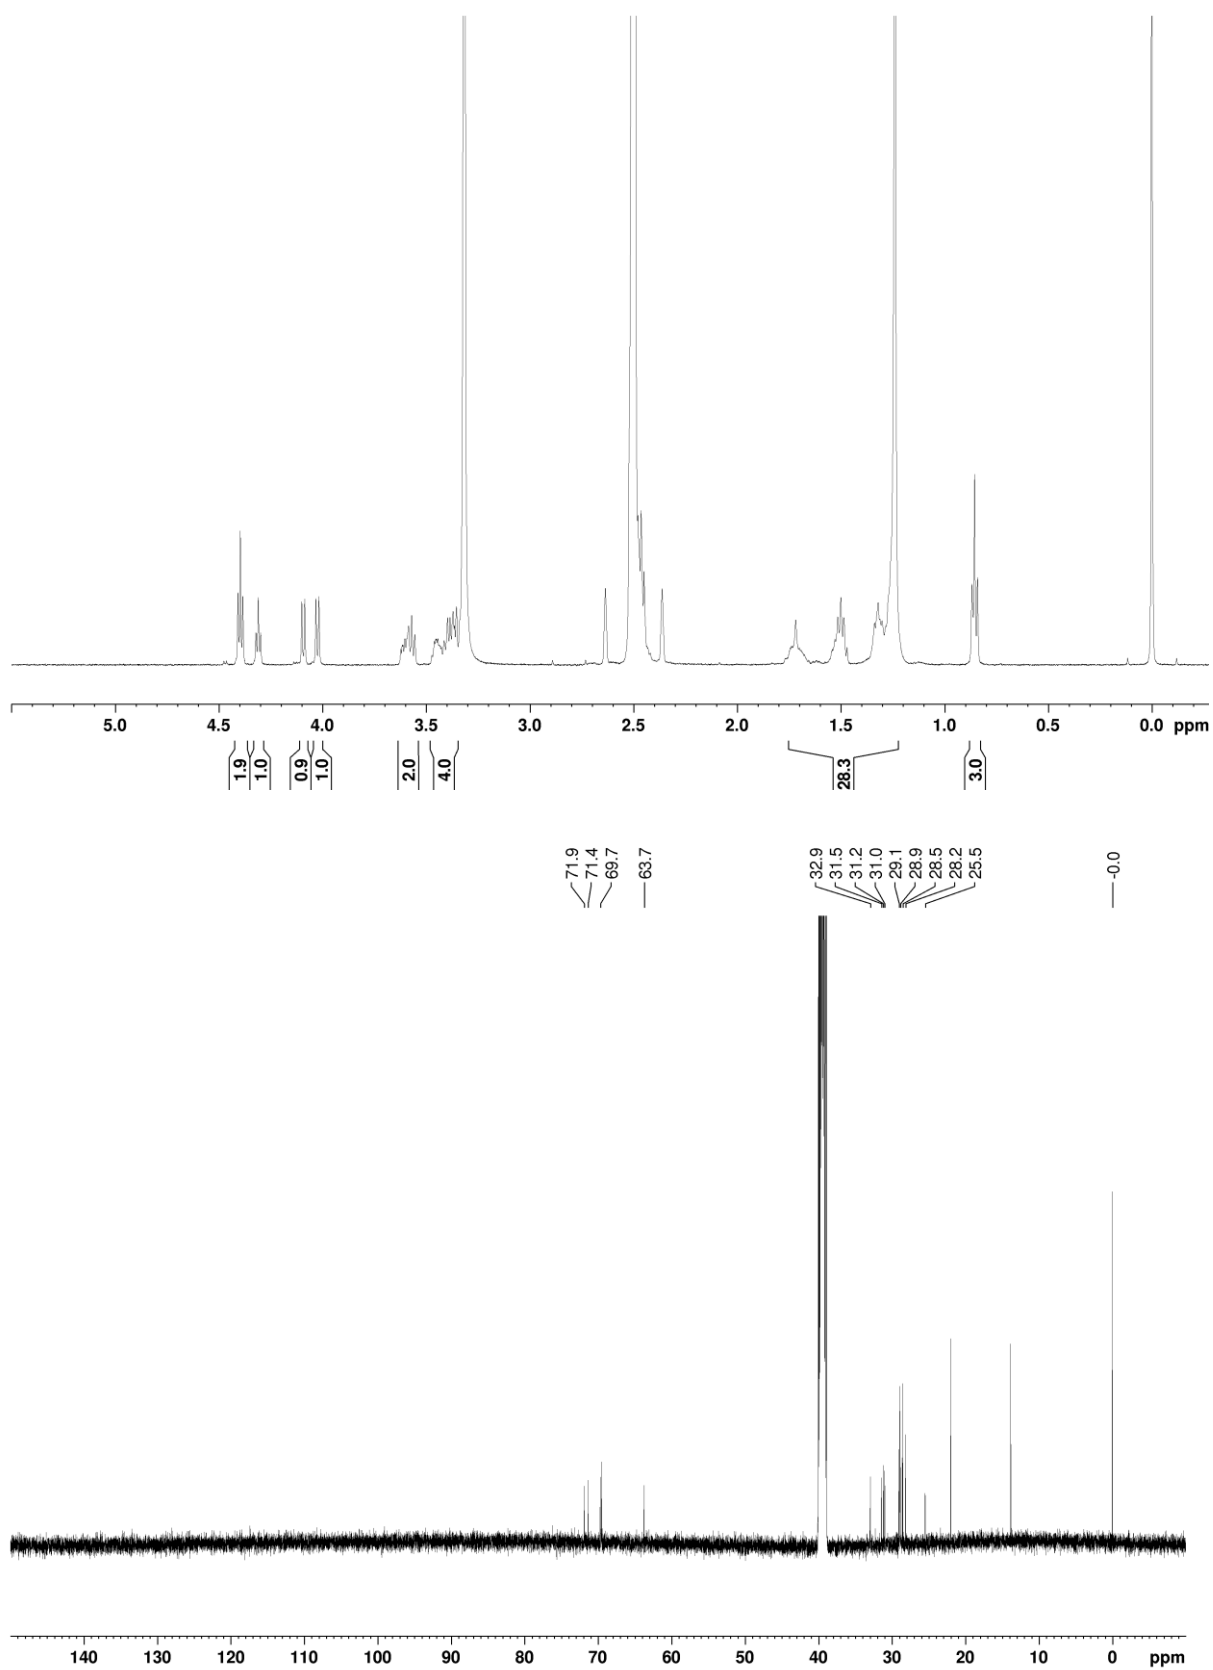

$^1\text{H}$ - and  $^{13}\text{C}$  NMR spectra of compound *t*-Rha\*-SC14

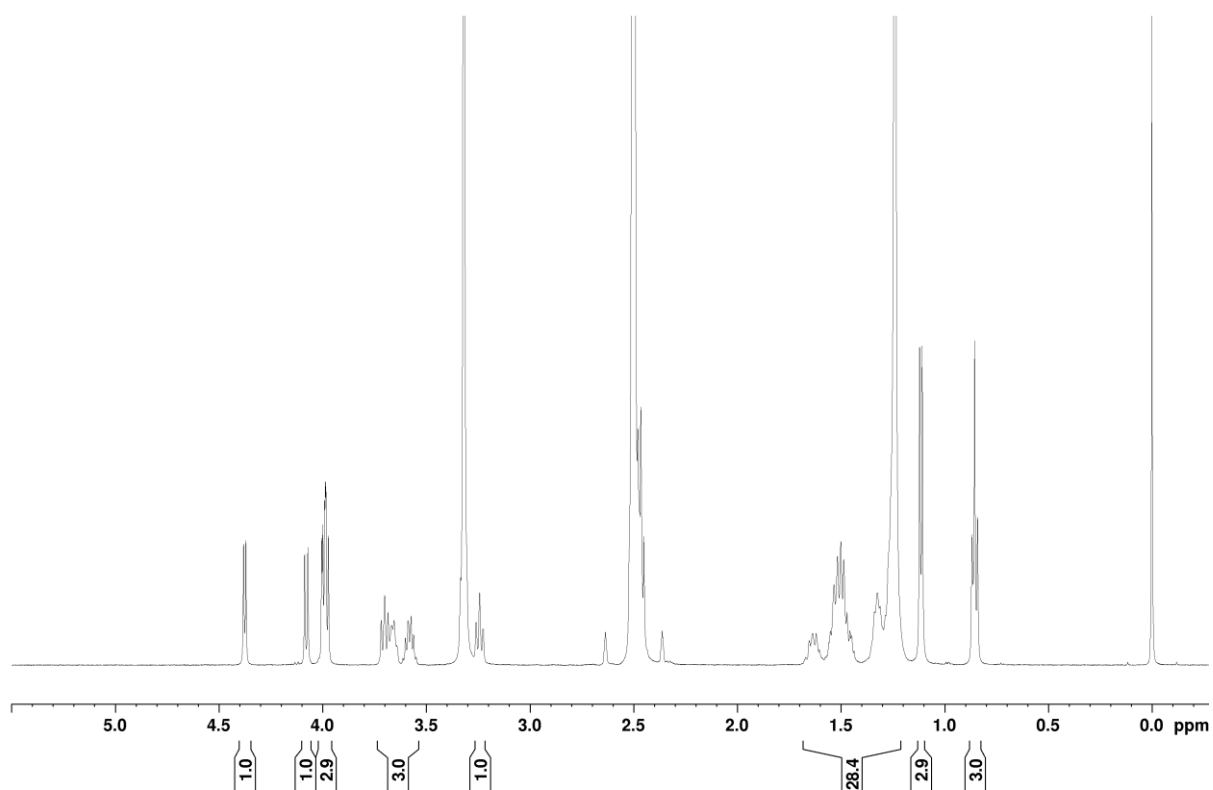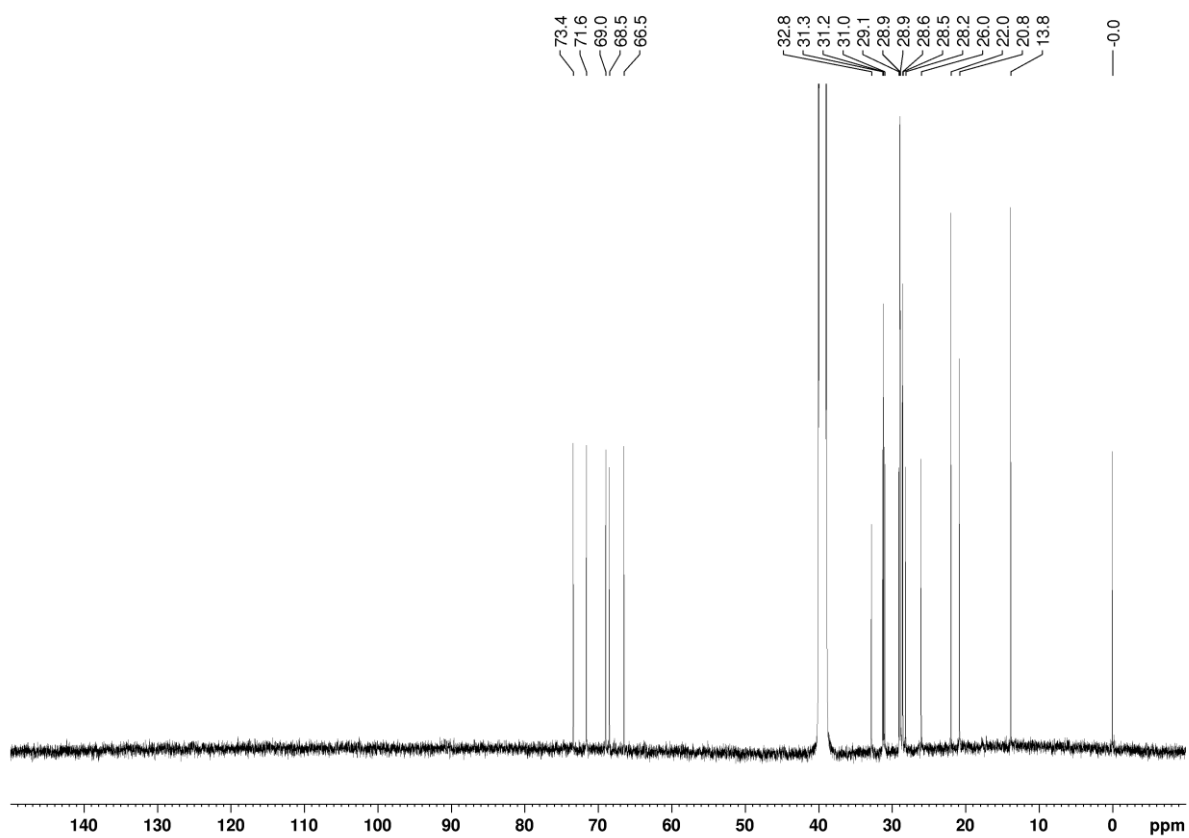

## Conformational analysis of allylated monosaccharides

Geometry optimizations of the structures of *e*-Glc\*, *e*-Gal\*, *t*-Ara\*, *e*-Ara\* and *t*-Rha\* in water was conducted by a multi-level deterministic structural optimization using the Conformers module in the software Materials studio 2019 version 19.1.0<sup>5,6</sup> and the Jaguar program<sup>7</sup> in the software Maestro 12.2.<sup>8</sup> At molecular mechanics (MM) level, the Universal Force Field was applied as implemented in the Conformers module. The most stable conformers were optimized with density functional theory (DFT) applying the B3LYP hybrid functional,<sup>9-12</sup> the 6-31G\*\* basis set and Grimme's method for DFT-D3 (dispersion) correction<sup>13</sup> as implemented in Jaguar. The surrounding medium might determine which conformation will be preferred. In order to corroborate this, the systems were studied in solution applying the COnductorlike Screening MOdel (COSMO)<sup>14</sup> with the dielectric constant 80.37 for water.



**Table S1.** Optimized geometries and NMR resolved  $^3J_{H,H}$  coupling constants (Hz) in D<sub>2</sub>O for compounds *t-Man\**, *t-Glc\**, *e-Glc\**, *t-Gal\**, *e-Gal\**, *t-Ara\**, *e-Ara\**, *t-Rha\**

| Entry          | Chemical structures and optimized geometries                                                              | $J_{2,3}$ | $J_{3,4}$ | $J_{4,5}$ | $J_{5,6}$ |
|----------------|-----------------------------------------------------------------------------------------------------------|-----------|-----------|-----------|-----------|
| 1 <sup>a</sup> | 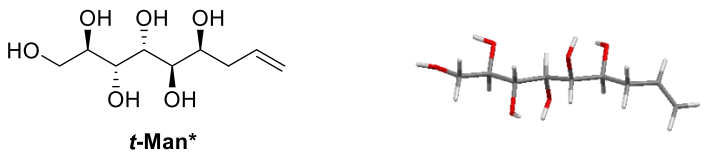 <p><i>t-Man*</i></p>   | 8.9       | 1.1       | 9.4       | 1.5       |
| 2 <sup>a</sup> |  <p><i>t-Glc*</i></p>   | 8.2       | 2.3       | 6.1       | 3.5       |
| 3              |  <p><i>e-Glc*</i></p>   | 7.8       | 3.0       | 3.7       | 6.9       |
| 4 <sup>a</sup> |  <p><i>t-Gal*</i></p>  | 1.5       | 9.2       | 1.5       | 6.6       |
| 5              |  <p><i>e-Gal*</i></p> | 1.5       | 9.4       | 1.1       | 8.5       |
| 6              |  <p><i>t-Ara*</i></p> | 8.3       | 2.1       | 6.2       | -         |
| 7              |  <p><i>e-Ara*</i></p> | 8.7       | 1.2       | 8.4       | -         |
| 8              |  <p><i>t-Rha*</i></p> | 7.9       | 1.3       | 9.2       | 1.6       |

<sup>a</sup> Geometry optimization and NMR-data reported in reference 3.

## Thermal analysis of allylated monosaccharides

**Table S2.** Melting points and melting enthalpies as determined by DSC, and molecular weights (for comparison) of compounds *t-Man*\*, *t-Glc*\*, *e-Glc*\*, *t-Gal*\*, *e-Gal*\*, *t-Ara*\*, *e-Ara*\*, *t-Rha*\*. The onset temperatures from the 1<sup>st</sup> heating cycle are reported.

| Compound       | Melting point (°C) | Melting enthalpy (normalized, J/g) | Molecular weight (g/mol) |
|----------------|--------------------|------------------------------------|--------------------------|
| <i>t-Man</i> * | 193.58             | 305.86                             | 222.24                   |
| <i>t-Glc</i> * | 88.90              | 124.59                             | 222.24                   |
| <i>e-Glc</i> * | 122.49             | 144.39                             | 222.24                   |
| <i>t-Gal</i> * | 102.64             | 135.97                             | 222.24                   |
| <i>e-Gal</i> * | 187.38             | 284.32                             | 222.24                   |
| <i>t-Ara</i> * | 121.04             | 219.28                             | 192.21                   |
| <i>e-Ara</i> * | 119.65             | 158.82                             | 192.21                   |
| <i>t-Rha</i> * | 169.27             | 244.29                             | 206.24                   |

## Thermal events for amphiphiles derived from allylated monosaccharides

**Table S3.** Thermal events for compounds *t*-Man\*-SC6, *t*-Man\*-SC10, *t*-Man\*-SC14, *t*-Glc\*-SC14, *e*-Glc\*-SC14, *t*-Gal\*-SC14, *e*-Gal\*-SC14, *t*-Ara\*-SC14, *e*-Ara\*-SC14, *t*-Rha\*-SC14 observed with DSC.

| Compound            | °C, (J/g)                                                                                                                                                                                                                                                                                                                                                                                          | Notes                                                                                                                                                                                                                                                                                            |
|---------------------|----------------------------------------------------------------------------------------------------------------------------------------------------------------------------------------------------------------------------------------------------------------------------------------------------------------------------------------------------------------------------------------------------|--------------------------------------------------------------------------------------------------------------------------------------------------------------------------------------------------------------------------------------------------------------------------------------------------|
| <i>t</i> -Man*-SC6  | 145.59, (8.54), $T_{ss}$<br>190.94, (169.94), $T_m$<br>198.33, (1.91), $T_i$<br><i>cooling</i><br>197.15, (-7.82), $T_o$<br>183.87, (-124.61), $T_c$                                                                                                                                                                                                                                               | solid-state phase transition <sup>a</sup><br>melting to smectic phase<br>isotropization<br><br>ordering to smectic phase<br>crystallization                                                                                                                                                      |
| <i>t</i> -Man*-SC10 | 137.09, (21.32), $T_{ss}$<br>186.29, (343.39), $T_m$<br>224.54, (6.38), $T_i$<br><i>cooling</i><br>224.94, (-7.46), $T_o$<br>178.44, (-111.62), $T_c$<br>90.79 (-14.17), $T_{ss}$                                                                                                                                                                                                                  | solid-state phase transition<br>melting to smectic phase<br>isotropization<br><br>ordering to smectic phase<br>crystallization<br>solid-state phase transition                                                                                                                                   |
| <i>t</i> -Man*-SC14 | <i>1<sup>st</sup> heating</i><br>169.71, (9.87), $T_m$<br>175.02, (-6.43), $T_c$<br>183.21 (113.07), $T_m$<br>231.49 (2.79), $T_i$<br><i>1<sup>st</sup> cooling</i><br>230.06 (-2.92), $T_o$<br>177.74 (-109.38), $T_c$<br><i>2<sup>nd</sup> heating</i><br>183.0, (121.26), $T_m$<br>229.25, (2.81), $T_i$<br><i>2<sup>nd</sup> cooling</i><br>228.15, (-2.61), $T_o$<br>177.33, (-105.04), $T_c$ | melting of minor polymorph <sup>a</sup><br>re-crystallization to main phase <sup>a</sup><br>melting to smectic phase<br>isotropization<br><br>ordering to smectic phase<br>crystallization<br><br>melting to smectic phase<br>isotropization<br><br>ordering to smectic phase<br>crystallization |
| <i>t</i> -Glc*-SC14 | <i>1<sup>st</sup> heating</i><br>104.28 (168.56) $T_m$<br>213.23 (3.18) $T_i$<br><i>1<sup>st</sup> cooling</i><br>211.53 (-3.15) $T_o$<br>104.28 (-122.01) $T_c$<br><i>2<sup>nd</sup> heating</i><br>102.83, (131.64), $T_m$<br>208.99, (3.03), $T_i$<br><i>2<sup>nd</sup> cooling</i><br>206.77, (-2.70), $T_o$<br>55.58, (-102.70), $T_c$                                                        | melting to smectic phase<br>isotropization<br><br>ordering to smectic phase<br>crystallization<br><br>melting to smectic phase<br>isotropization<br><br>ordering to smectic phase<br>crystallization                                                                                             |
| <i>e</i> -Glc*-SC14 | <i>1<sup>st</sup> heating</i><br>83.47 (41.53) $T_{cub}$<br>125.94 (101.04) $T_m$<br>220.33 (3.01) $T_i$<br><i>1<sup>st</sup> cooling</i>                                                                                                                                                                                                                                                          | transition to cubic phase<br>melting to smectic phase<br>isotropization                                                                                                                                                                                                                          |

|                           |                                                                                                                                                                                                                                                                                                                                                                                                                                                                                                                                                                                                                                                                                                                                                                                    |                                                                                                                                                                                                                                                                                                                                                                                                                                                                        |
|---------------------------|------------------------------------------------------------------------------------------------------------------------------------------------------------------------------------------------------------------------------------------------------------------------------------------------------------------------------------------------------------------------------------------------------------------------------------------------------------------------------------------------------------------------------------------------------------------------------------------------------------------------------------------------------------------------------------------------------------------------------------------------------------------------------------|------------------------------------------------------------------------------------------------------------------------------------------------------------------------------------------------------------------------------------------------------------------------------------------------------------------------------------------------------------------------------------------------------------------------------------------------------------------------|
|                           | <p>217.68 (-2.89) <math>T_o</math><br/> 122.10 (-100.69) <math>T_{cub}</math><br/> 77.98 (-4.89) <math>T_c</math><br/> 69.46 (-23.36) <math>T_{ss}</math><br/> 2<sup>nd</sup> heating<br/> 31.07, (2.67), <math>T_{ss}</math><br/> 84.45, (38.34), <math>T_{cub}</math><br/> 121.93, (72.92), <math>T_m</math><br/> 209.91, (2.76), <math>T_i</math><br/> 2<sup>nd</sup> cooling<br/> 206.97, (-2.16), <math>T_o</math><br/> 115.93, (-64.15), <math>T_{cub}</math><br/> 78.51, (-15.84), <math>T_c</math><br/> 34.25, (-17.21), <math>T_{ss}</math></p>                                                                                                                                                                                                                           | <p>ordering to smectic phase<br/> transition to cubic phase<br/> crystallization<br/> solid-state transition</p> <p>solid-state transition<br/> transition to cubic phase<br/> melting to smectic phase<br/> isotropization</p> <p>ordering to smectic phase<br/> transition to cubic phase<br/> crystallization<br/> solid-state transition</p>                                                                                                                       |
| <b><i>t</i>-Gal*-SC14</b> | <p>1<sup>st</sup> heating<br/> 103.24 (35.87), <math>T_{ss}</math><br/> 120.52 (98.11), <math>T_m</math><br/> 216.65 (3.03), <math>T_i</math><br/> 1<sup>st</sup> cooling<br/> 216.06 (-3.02), <math>T_o</math><br/> 104.10 (-90.00), <math>T_c</math><br/> 54.79 (-37.24), <math>T_{ss}</math><br/> 2<sup>nd</sup> heating<br/> 52.62 (37.33), <math>T_{ss}</math><br/> 118.24 (91.57), <math>T_m</math><br/> 212.04, (1.81), <math>T_i</math><br/> 2<sup>nd</sup> cooling<br/> 211.83, (-2.37), <math>T_o</math><br/> 97.63, (-75.18), <math>T_c</math><br/> 56.51, (-29.07), <math>T_{ss}</math></p>                                                                                                                                                                            | <p>solid-state transition/minor phase melting<sup>a</sup><br/> melting to smectic phase<br/> isotropization</p> <p>ordering to smectic phase<br/> crystallization<br/> solid-state phase transition</p> <p>solid-state transition<br/> melting to smectic phase<br/> isotropization</p> <p>ordering to smectic phase<br/> crystallization<br/> solid-state transition</p>                                                                                              |
| <b><i>e</i>-Gal*-SC14</b> | <p>1<sup>st</sup> heating<br/> 54.91 (4.25), <math>T_{ss}</math><br/> 127.89 (33.83), <math>T_{cub}</math><br/> 173.69 (122.08), <math>T_m</math><br/> 225.70 (2.84), <math>T_i</math><br/> 1<sup>st</sup> cooling<br/> 216.56 (-2.34), <math>T_o</math><br/> 154.17 (-78.40), <math>T_{cub}</math><br/> 116.73 (-25.04), <math>T_c</math><br/> 56.15 (-3.68), <math>T_{ss}</math><br/> 42.49, (-6.13), <math>T_{ss}</math><br/> 2<sup>nd</sup> heating<br/> 33.64, (5.48), <math>T_{ss}</math><br/> 55.34, (4.50), <math>T_{ss}</math><br/> 129.13, (20.84), <math>T_{cub}</math><br/> 164.68, (80.35), <math>T_m</math><br/> 207.20, (2.17), <math>T_i</math><br/> 2<sup>nd</sup> cooling<br/> 183.19, (-2.22), <math>T_o</math><br/> 137.83, (-42.64), <math>T_{cub}</math></p> | <p>solid-state transition<br/> transition to cubic phase<br/> melting to smectic phase<br/> isotropization</p> <p>ordering to smectic phase<br/> transition to cubic phase<br/> crystallization<br/> solid-state transition<br/> solid-state transition</p> <p>solid-state transition<br/> solid-state transition<br/> transition to cubic phase<br/> melting to smectic phase<br/> isotropization</p> <p>ordering to smectic phase<br/> transition to cubic phase</p> |

|                           |                                                                                                                                                                                                                                                                                                                                                                                                                                                                     |                                                                                                                                                                                                                                                                                                                                                                                                             |
|---------------------------|---------------------------------------------------------------------------------------------------------------------------------------------------------------------------------------------------------------------------------------------------------------------------------------------------------------------------------------------------------------------------------------------------------------------------------------------------------------------|-------------------------------------------------------------------------------------------------------------------------------------------------------------------------------------------------------------------------------------------------------------------------------------------------------------------------------------------------------------------------------------------------------------|
|                           | 116.99, (-4.91), $T_c$<br>56.55, (-2.01), $T_{ss}$<br>35.03, (-20.94), $T_{ss}$                                                                                                                                                                                                                                                                                                                                                                                     | crystallization<br>solid-state transition<br>solid-state transition                                                                                                                                                                                                                                                                                                                                         |
| <b><i>t</i>-Ara*-SC14</b> | <i>1<sup>st</sup> heating</i><br>74.23 (10.91) $T_m$<br>83.72 (119.37) $T_m$<br>184.67 (3.32) $T_i$<br><i>1<sup>st</sup> cooling</i><br>183.64 (-2.83) $T_o$<br>68.96 (-100.95) $T_c$<br><i>2<sup>nd</sup> heating</i><br>74.78, (1.66), $T_m$<br>85.14, (95.74), $T_m$<br>184.00, (2.78), $T_i$<br><i>2<sup>nd</sup> cooling</i><br>183.32, (-2.84), $T_o$<br>68.09, (-95.26), $T_c$                                                                               | melting of minor polymorph phase<br>melting to smectic phase<br>isotropization<br><br>ordering to smectic phase<br>crystallization<br><br>melting of minor polymorph phase<br>melting to smectic phase<br>isotropization<br><br>ordering to smectic phase<br>crystallization                                                                                                                                |
| <b><i>e</i>-Ara*-SC14</b> | <i>1<sup>st</sup> heating</i><br>121.24 (119.95) $T_m/ T_{ss}$<br>124.67 (86.13) $T_m$<br>192.47 (2.56) $T_i$<br><i>1<sup>st</sup> cooling</i><br>191.69 (-2.64) $T_o$<br>119.14 (-116.91) $T_{cub}$<br>55.52 (-5.21) $T_c$<br><i>2<sup>nd</sup> heating</i><br>71.55 (20.16) $T_{cub}$<br>124.24 (119.15) $T_m$<br>191.95 (2.49) $T_i$<br><i>2<sup>nd</sup> cooling</i><br>191.21, (-2.58), $T_o$<br>118.74, (-114.03), $T_{cub}$<br>53.09, (-2.87), $T_c$         | melting of a polymorph or solid-state transition trans <sup>a</sup><br>melting to smectic phase<br>isotropization<br><br>ordering to smectic phase<br>transition to cubic phase<br>crystallization/solid-state transition<br><br>transition to cubic phase<br>melting to smectic phase<br>isotropization<br><br>ordering to smectic phase<br>transition to cubic<br>crystallization/solid-state transition  |
| <b><i>t</i>-Rha*-SC14</b> | <i>1<sup>st</sup> heating</i><br>59.11 (20.78), $T_{ss}$<br>97.15 (14.30), $T_{ss}$<br>119.83 (19.74), $T_{cub}$<br>148.49 (40.03), $T_{pre}$<br>167.07 (57.01), $T_m$<br>174.40 (9.78), $T_i$<br><i>1<sup>st</sup> cooling</i><br>173.84 (-9.50), $T_o$<br>168.25 (-51.99), $T_{pre}$<br>127.31 (-25.19), $T_{cub}$<br>103.60 (-31.45), $T_c$<br><i>2<sup>nd</sup> heating</i><br>71.47, (1.42), $T_{ss}$<br>98.53, (1.63), $T_{ss}$<br>135.09, (16.45), $T_{cub}$ | solid-state transition <sup>a</sup><br>solid-state transition<br>transition to cubic phase<br>transition to pre-layered phase<br>melting to smectic phase<br>isotropization<br><br>ordering to smectic phase<br>transition to pre-layered phase<br>transition to cubic phase<br>crystallization/solid-state transition<br><br>solid-state transition<br>solid-state transition<br>transition to cubic phase |

|  |                               |                                        |
|--|-------------------------------|----------------------------------------|
|  | 148.89, (12.49), $T_{pre}$    | transition to pre-layered phase        |
|  | 167.05, (57.77), $T_m$        | melting to smectic phase               |
|  | 173.89, (9.73), $T_i$         | isotropization                         |
|  | <i>2<sup>nd</sup> cooling</i> |                                        |
|  | 173.67, (-9.57), $T_o$        | ordering to smectic phase              |
|  | 168.18, (-51.54), $T_{pre}$   | transition to pre-layered phase        |
|  | 127.27, (-22.71), $T_{cub}$   | transition to cubic phase              |
|  | 103.42, (-7.81), $T_c$        | crystallization/solid-state transition |

All thermal transition taken as an extrapolated onset value, <sup>a</sup> = not seen on 2<sup>nd</sup> heating run.

## DSC curves for amphiphiles derived from allylated monosaccharides

DSC curve for *t*-Man\*-SC6

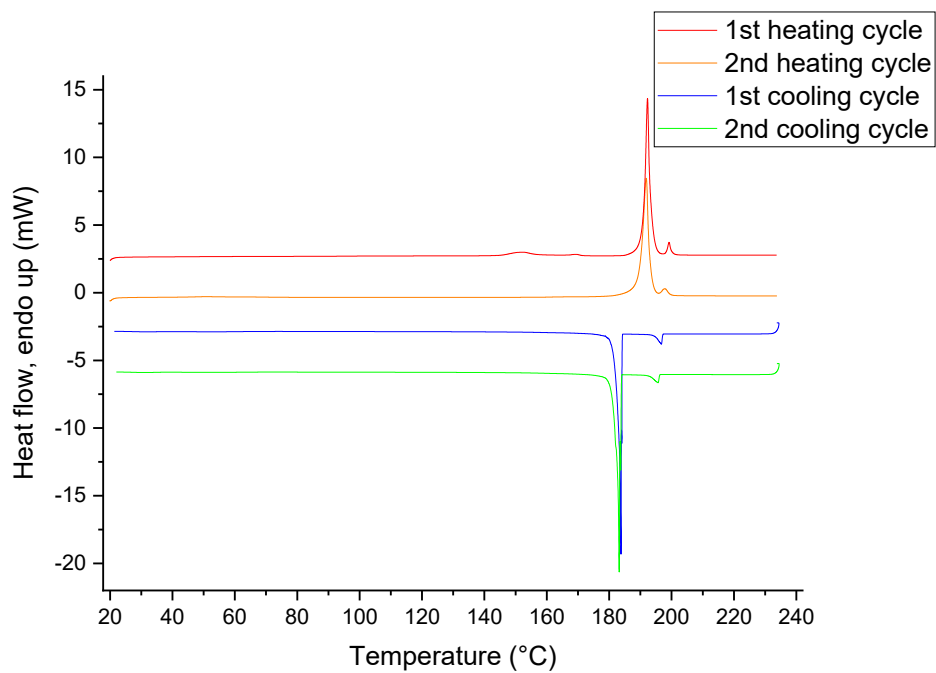

DSC curve for *t*-Man\*-SC10

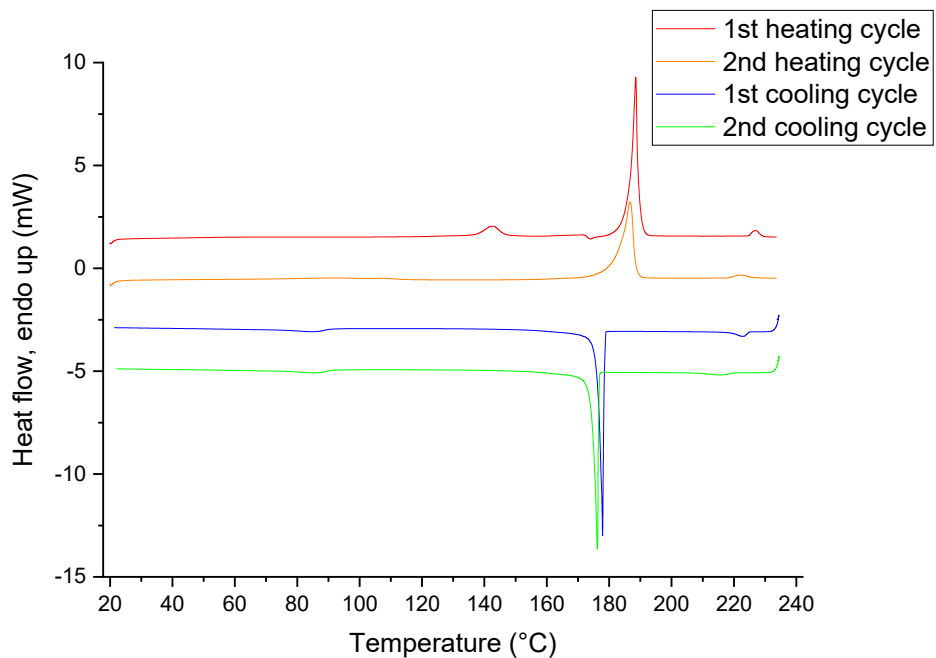

DSC curve for *t*-Man\*-SC14

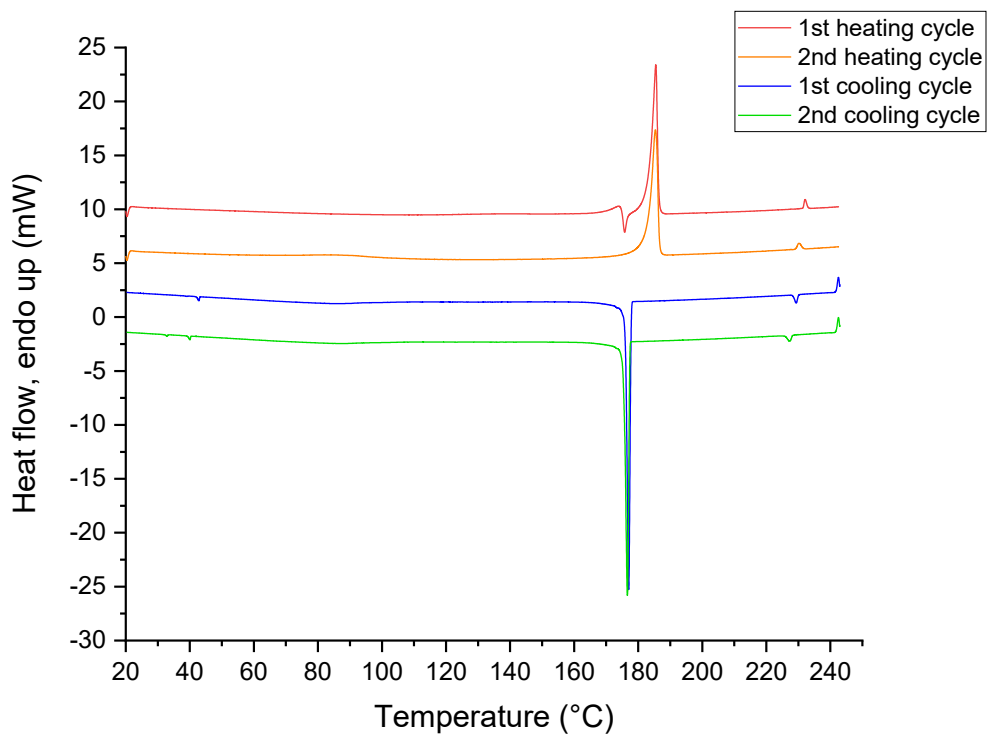

DSC curve for *t*-Glc\*-SC14

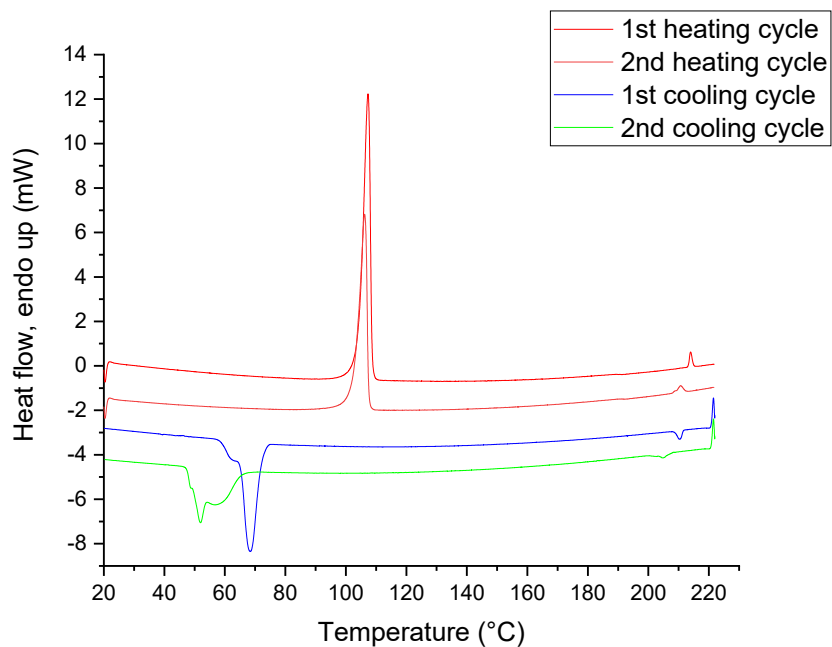



### DSC curve for *e*-Glc\*-SC14

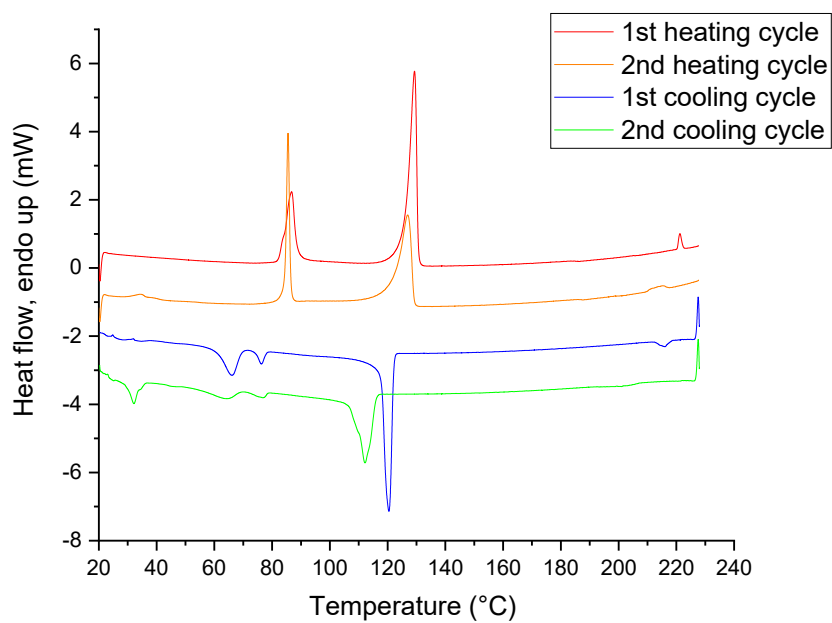

### DSC curve for *t*-Gal\*-SC14

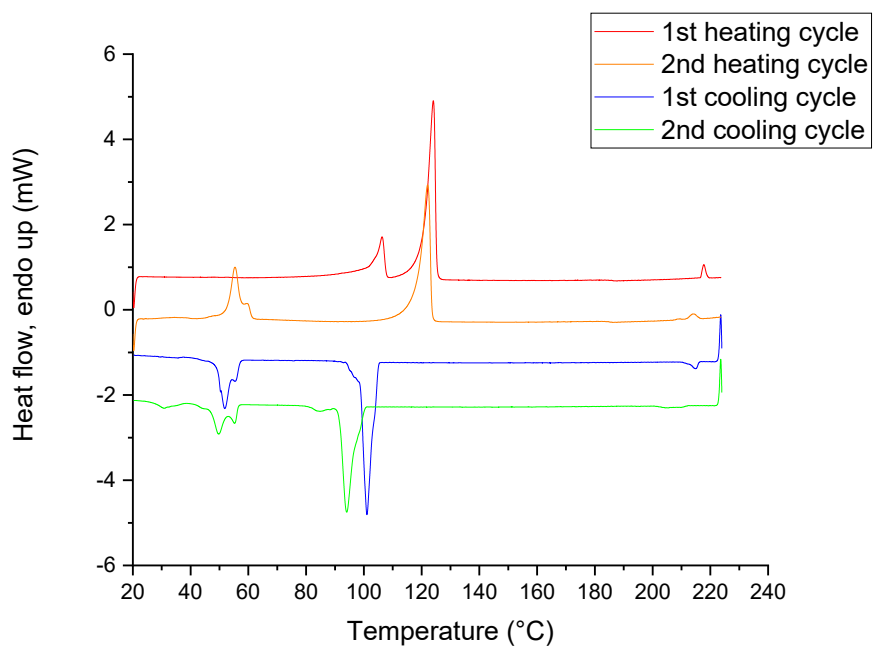

DSC curve for *e*-Gal\*-SC14

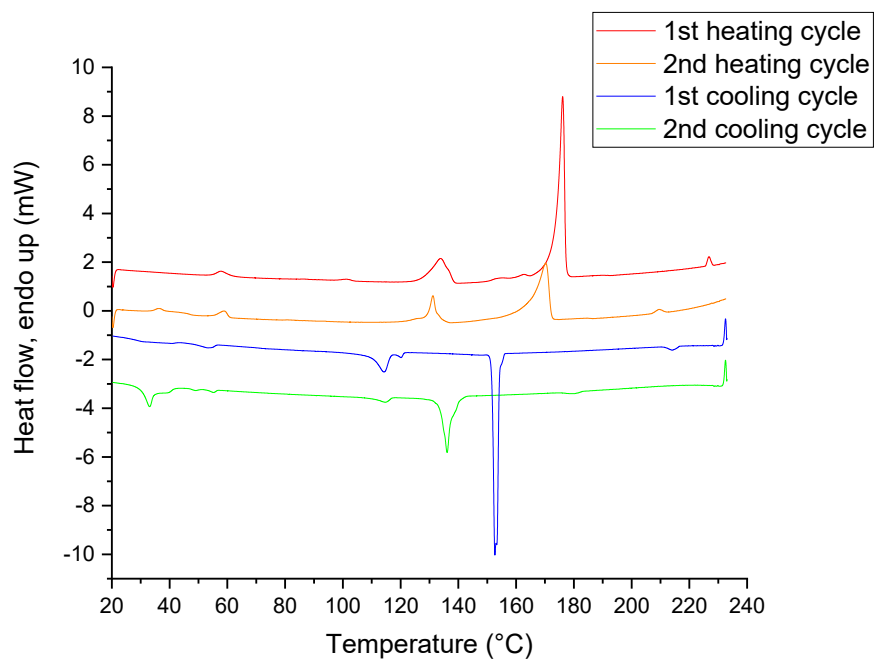

DSC curve for *t*-Ara\*-SC14

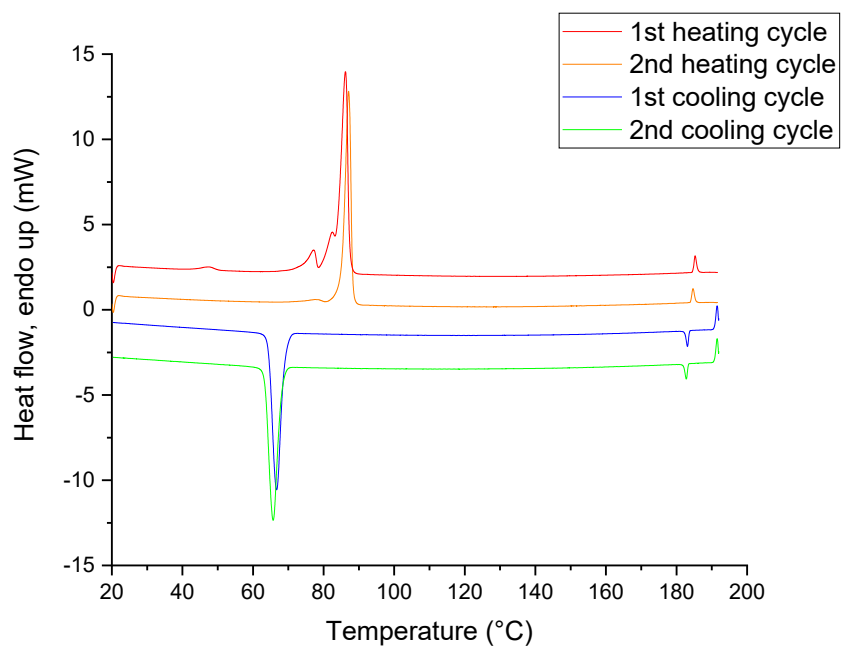

DSC curve for *e*-Ara\*-SC14

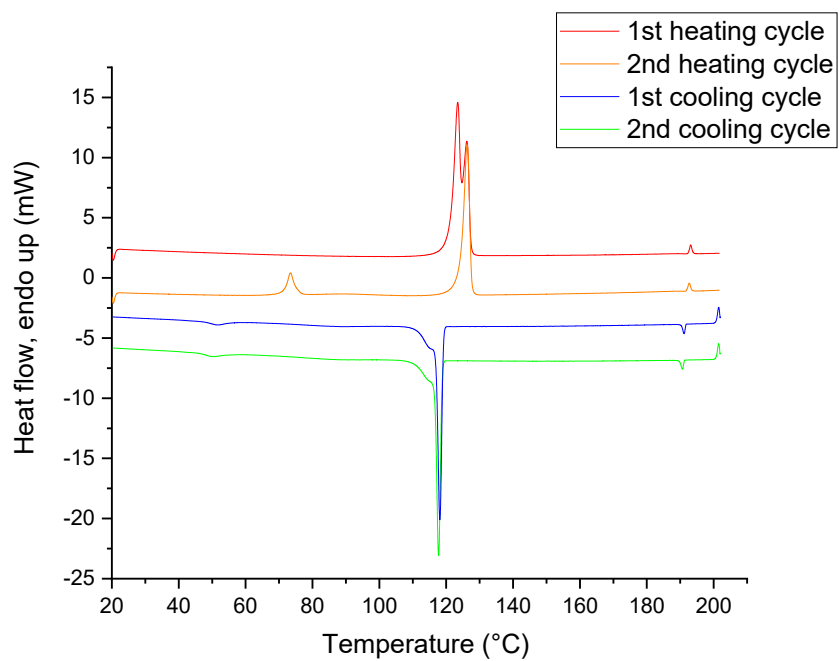

DSC curve for *t*-Rha\*-SC14

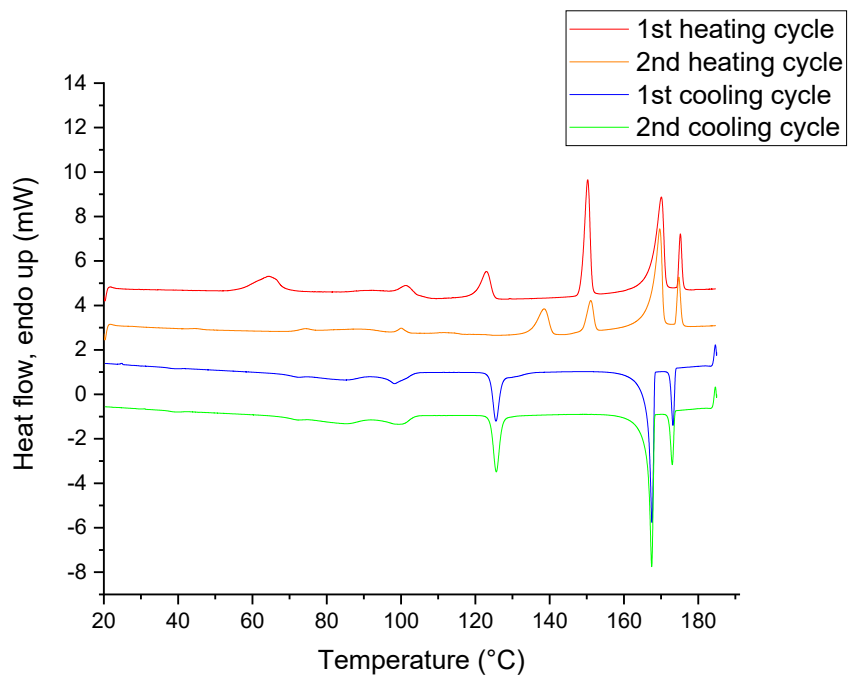

## Polarized Optical Microscopy Observations

Mannose-based compound *t-Man*\*-SC6 showed a fairly narrow  $T_{LC}$  window (191-198 °C) and the smectic A phase was captured with POM by slight pressing at 198 °C during the 2<sup>nd</sup> cooling cycle. For *t-Man*\*-SC10, the smectic A phase was captured at the 2<sup>nd</sup> heating cycle at 204 °C with slight pressing. Compound *t-Man*\*-SC10 melted slower than *t-Man*\*-SC14 into Sm liquid crystal phase. Compound *t-Man*\*-SC14 melted at around 183 °C without any visually observable solid-state transition. The liquid crystalline phase shows oily streaks and upon cooling the texture remains more or less the same in the solid phase.

Glucose-derived amphiphile *t-Glc*\*-SC14 is thermally the most “simple” of the compounds studied. The only thermal events observed are the crystalline melting and isotropization, with a liquid crystalline window spanning over 100 °C. The texture forms oily streaks. Compound *e-Glc*\*-SC14 exhibits a strong solid-solid transition at around 85 °C, which is observable only in the 2<sup>nd</sup> heating cycle with POM when the sample is a film. Compound *e-Glc*\*-SC14 melts slowly to the liquid crystalline phase, and the texture is similar to the other compounds studied. Upon cooling, the sample crystallizes clearly and the molten droplets shrink significantly upon crystallization.

The galactose derivative *t-Gal*\*-SC14 displays a solid-solid transition where colorful solid crystals appear at around 100 °C in the 1<sup>st</sup> heating cycle and at 50 °C in the 2<sup>nd</sup> heating cycle. The compound melts slowly to the liquid crystalline phase at 120 °C, forming an oily streak texture similar to the other compounds. The *erythro* galactose-derived diastereomer *e-Gal*\*-SC14 shows a solid-solid transition at around 130 °C where shiny crystals appear in POM. The compound melts to the liquid crystalline phase with the texture again identical to the other samples in the series. Upon cooling, however, the compound crystallizes sharply at around 150 °C. The borders of the phase are too sharp to be liquid, and this phase can be compressed and returns to its original shape once the pressure is released. The compound solidifies at 115 °C with a similar texture.

The arabinose-derivative *t-Ara*\*-SC14 melts sharply to liquid crystalline state and has a liquid crystal window of about 100 °C. The liquid crystal texture is similar to the other compounds and upon crystallization back to solid, a small change in the texture is observed. The *erythro* diastereomer *e-Ara*\*-SC14 likely consists of two polymorphs in bulk form. The first DSC heating cycle shows two overlapping peaks which are observable in POM by the disappearance of larger, shiny crystals, which either melt into liquid crystalline state or transform into another polymorph, whereafter the remaining sample melts into liquid crystalline state. The texture is again similar to the other amphiphilic compounds and upon cooling the sample crystallizes sharply to solid form. A solid-solid

transition in the form of a small shoulder in the crystallization peak in DSC can be observed by POM as a slight change in texture upon solidification.

The rhamnose derivative *t*-**Rha**\*-**SC14** shows the most complex thermal behavior of the analyzed samples. Already in the solid state the sample looks different, forming larger crystals in the bulk form compared to the fine powders formed by the other amphiphilic sulfides. Some crystals are sufficiently large to shine under polarized light. These large, shiny crystals disappear in the two solid-solid transitions observed at around 60 and 100 °C in the first heating cycle, indicating the existence of more than one polymorph or other kinetic structures. At around 150 °C, compound *t*-**Rha**\*-**SC14** forms a viscoelastic crystalline state. This state behaves like a highly viscous form of liquid crystal and can be compressed, but the boundaries are too sharp for a liquid. At about 170 °C, this state transforms into liquid crystal state with smectic texture similar to the rest of the samples. The liquid crystalline window is only a few degrees wide but still observable by POM before isotropization. Upon cooling, the sample again shows a narrow liquid crystalline state, whereafter it again adopts the viscoelastic state. The temperature range for this state is significantly wider during the cooling cycles, indicating supercooling of the sample. Upon solidification, the texture remains more or less unchanged.

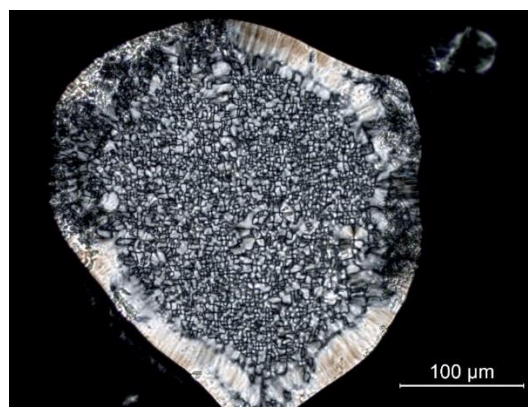

**Figure S2.** POM (crossed polars) image of the smectic phase (Sm) texture of compound *t*-**Man**\*-**SC6** at 198 °C obtained after cooling and slightly pressing the sample cover glass.

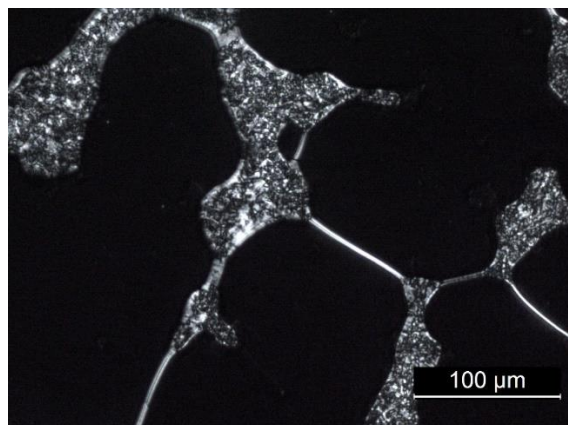

**Figure S3.** POM (crossed polars) image of the Sm phase of compound *t*-**Man**\*-**SC10** at 204 °C obtained during 2<sup>nd</sup> heating after slightly pressing the sample cover glass.

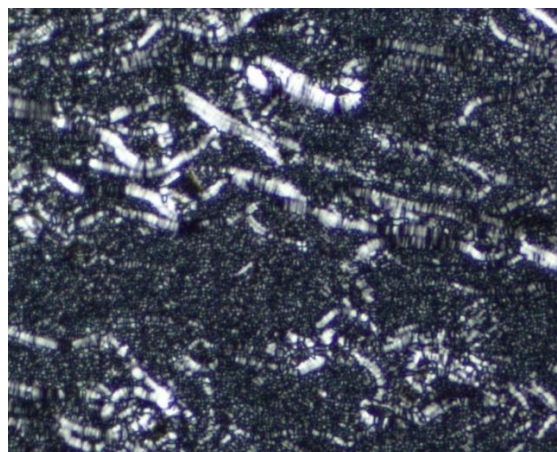

**Figure S4.** POM (crossed polars) image (zoomed-in from 100x magnification) of the Sm phase of compound *t*-**Man**\*-**SC14** at 200 °C obtained during 2<sup>nd</sup> heating after slightly pressing the sample cover glass.

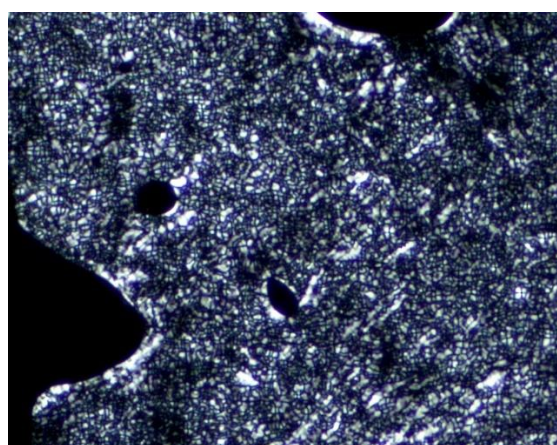

**Figure S5.** POM (crossed polars) image (zoomed-in from 100x magnification) of the Sm phase of compound *t*-**Glc**\*-**SC14** at 110 °C obtained during 2<sup>nd</sup> heating after slightly pressing the sample cover glass.

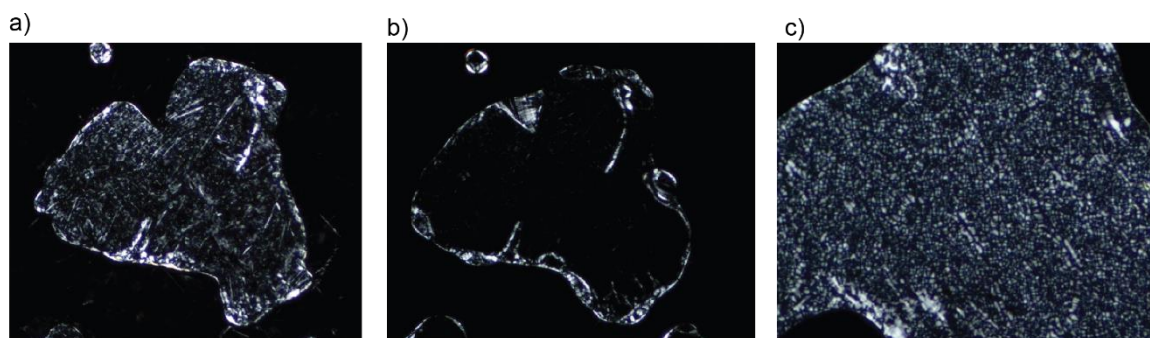

**Figure S6.** POM (crossed polars) images (zoomed-in from 100x magnification) of compound *e-Glc\*-SC14*. a) Images taken during 2<sup>nd</sup> heating to 80 °C and continued to b) 130 °C where a decrease in birefringence has developed during heating. c) The Sm phase appears at 130 °C after pressing the sample glass cover.

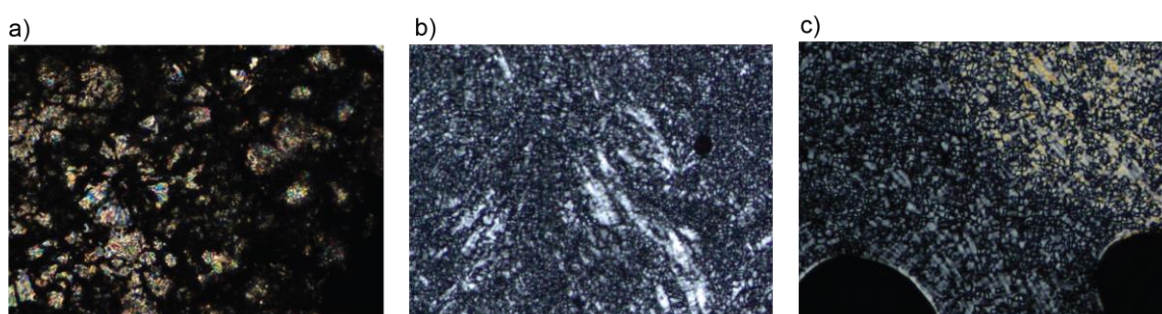

**Figure S7.** POM (crossed polars) images (zoomed-in from 100x magnification) of compound *t-Gal\*-SC14*. a) At 114 °C during 1<sup>st</sup> heating iridescent color appear during melting. b) With continued heating the Sm phase appears at 125 °C after pressing. c) At 110 °C upon 1<sup>st</sup> cooling a Sm-solid transition appears with changes in birefringence (bright frontier expands upon cooling).

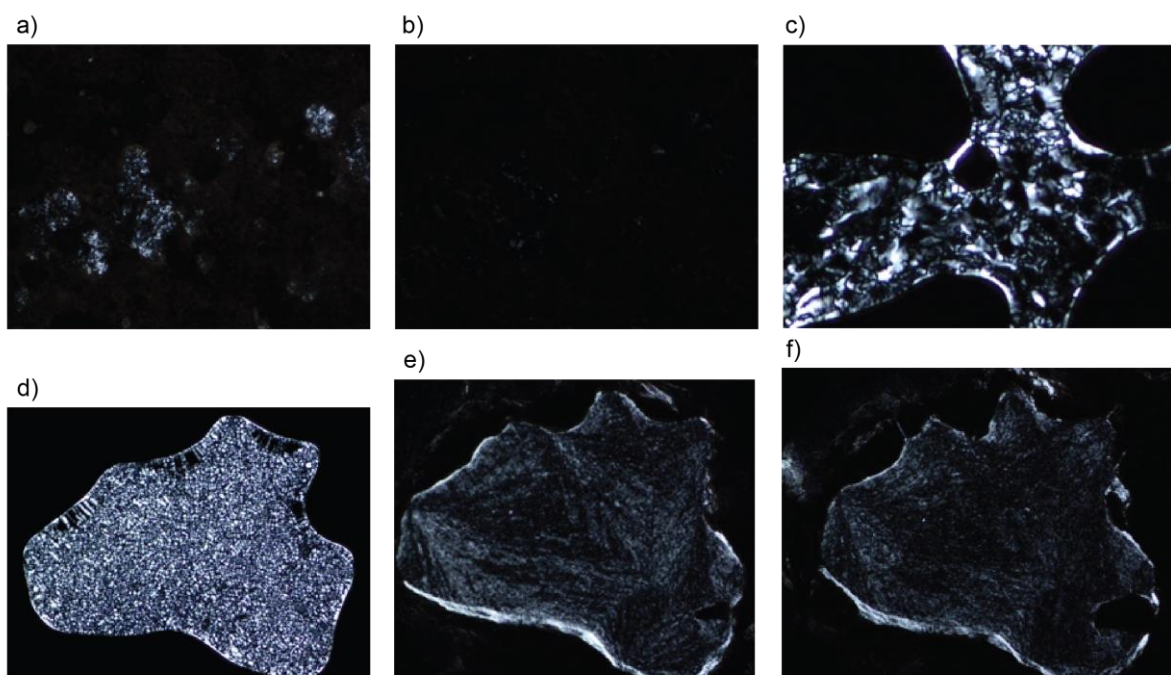

**Figure S8.** POM (crossed polars) images (zoomed-in from 100x magnification) of compound *e-Gal*\*-SC14. During 1<sup>st</sup> heating at a) 146 °C the sample melts, yet at b) 165 °C it also loses birefringence before c) at 180 °C a Sm phase is obtained. During cooling the Sm phase appears at d) 180 °C and the isotropic viscose phase at e) 144 °C. The isotropic viscose phase transition is reproducible and during 2<sup>nd</sup> heating at f) 150 °C a loss of birefringence is observed and sample compresses with pressing on the glass slide.

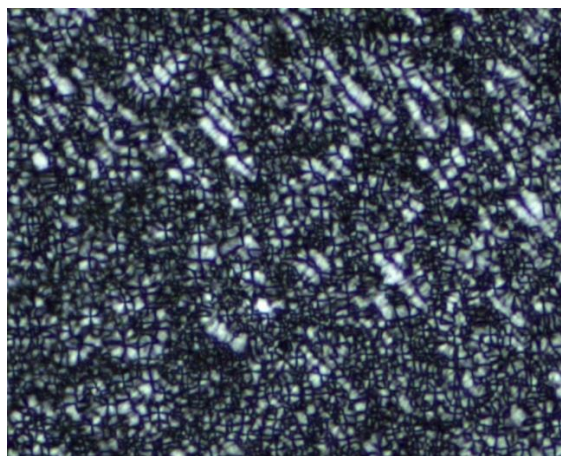

**Figure S9.** POM (crossed polars) image (zoomed-in from 100x magnification) of compound *t-Ara*\*-SC14 at 160 °C upon cooling showing the Sm phase texture.

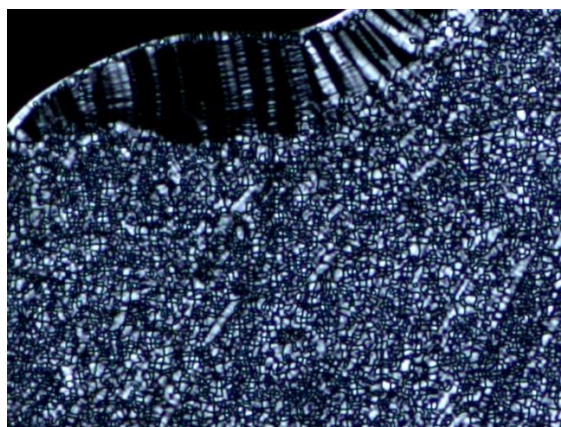

**Figure S10.** POM (crossed polars) image (zoomed-in from 100x magnification) of compound *e-Ara*\*-SC14 Sm phase at 177 °C upon cooling.



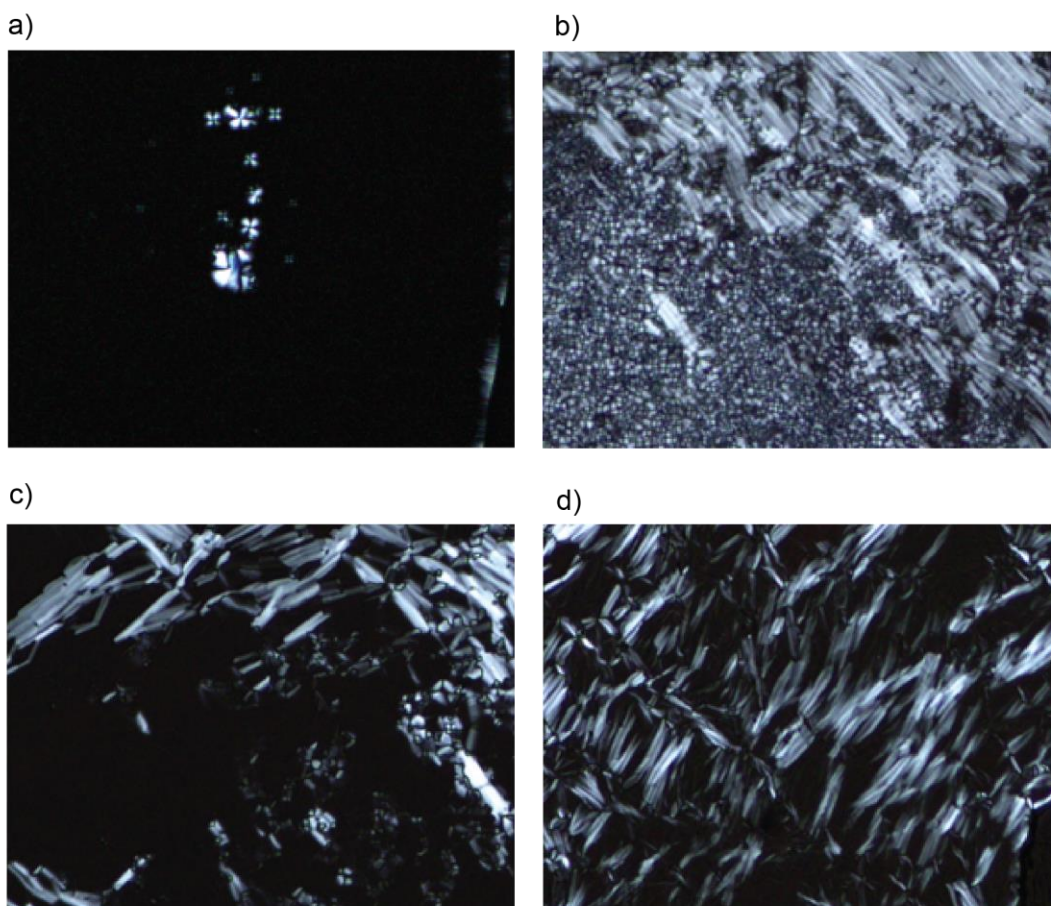

**Figure S11.** POM (crossed polars) images (zoomed-in from 100x magnification) of compound *t*-Rha\*-SC14 at a) 169 °C upon cooling and b) at 169 °C right after pressing the sample cover glass. c) At 115 °C upon cooling and pressing the sample, the mosaic texture disappears and is replaced by an isotropic phase. d) upon reheating to Sm phase and cooling back to 146 °C, a unique liquid crystalline texture is obtained.

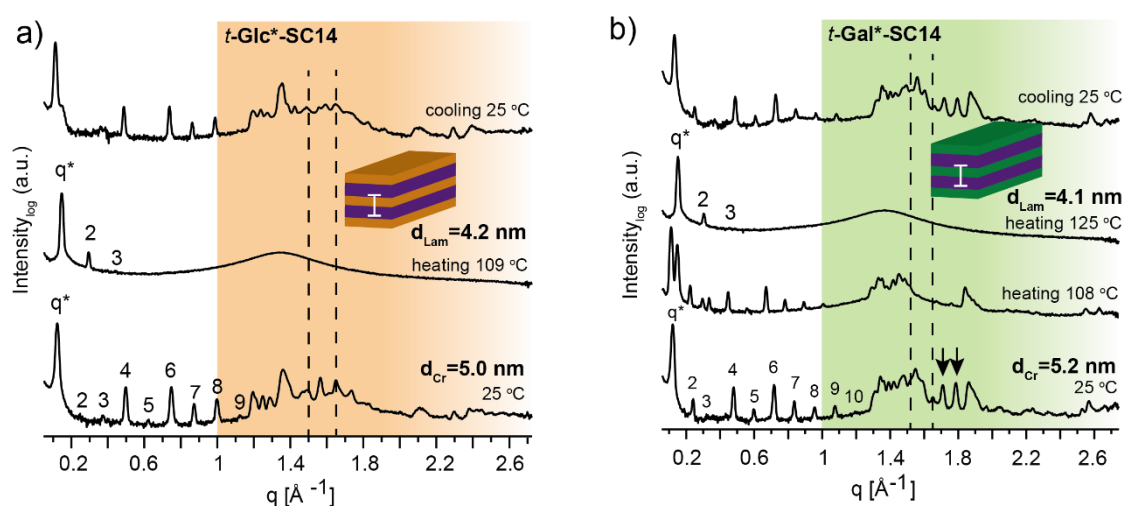

**Figure S12.** Selected SWAXS profiles for a) *t*-Glc\*-SC14 and b) *t*-Gal\*-SC14 compounds. Dashed lines indicate the position of the crystalline alkyl tail peaks. Colored areas represent the wide-angle regions. Black arrows indicate WAXS peaks for polyol block structure at 25 °C, which intensity decreases upon heating to 108 °C demonstrating the hydrogen bonding rearrangement within the polyol blocks.

**Table S4.** *e-Glc\*-SC14* (at 109 °C) cubic phase structure parameter estimation using the Pm3m (simple cubic structure) structure lattice parameters with program Scatter SWAXS data analyzing program. Cubic lattice parameter of  $a_{\text{Cub}}=6.1$  nm was calculated with Scatter.

| hkl | q/q*       | q <sub>hkl</sub> [nm]<br>Scatter fit |
|-----|------------|--------------------------------------|
| 100 | 1          | 0.103                                |
| 110 | $\sqrt{2}$ | 0.146                                |
| 111 | $\sqrt{3}$ | 0.180                                |
| 200 | 2          | 0.207                                |
| 211 | $\sqrt{6}$ | 0.255                                |
| 220 | $\sqrt{8}$ | 0.292                                |
| 221 | 3          | 0.310                                |
| 400 | 4          | 0.413                                |
| 500 | 5          | 0.517                                |
| 600 | 6          | 0.622                                |
| 700 | 7          | 0.723                                |
| 800 | 8          | 0.820                                |
| 900 | 9          | 0.922                                |

**Table S5.** *e-Gal\*-SC14* (at 135 °C) cubic phase structure parameter estimation using the Pm3m (simple cubic structure) structure lattice parameters with program Scatter SWAXS data analyzing program. Cubic lattice parameter of  $a_{\text{Cub}}=5.6$  nm was calculated with Scatter.

| hkl | q/q*        | q <sub>hkl</sub> [nm]<br>Scatter fit |
|-----|-------------|--------------------------------------|
| 100 | 1           | 0.111                                |
| 110 | $\sqrt{2}$  | 0.158                                |
| 111 | $\sqrt{3}$  | 0.194                                |
| 200 | 2           | 0.224                                |
| 222 | $\sqrt{12}$ | 0.388                                |
| 311 | $\sqrt{11}$ | 0.371                                |
| 400 | 4           | 0.448                                |
| 431 | $\sqrt{27}$ | 0.571                                |
| 600 | 6           | 0.671                                |
| 620 | $\sqrt{40}$ | 0.708                                |
| 621 | $\sqrt{41}$ | 0.717                                |
| 533 | $\sqrt{43}$ | 0.734                                |
| 622 | $\sqrt{44}$ | 0.742                                |
| 700 | 7           | 0.783                                |

**Table S6.** *e-Ara\*-SC14* (at 122 °C) cubic phase structure parameter estimation using the Pm3m (simple cubic structure) structure lattice parameters with program Scatter SWAXS data analyzing program. Cubic lattice parameter of  $a_{\text{Cub}}=5.8$  nm was calculated with Scatter.

| hkl | q/q*        | q <sub>hkl</sub> [nm]<br>Scatter fit |
|-----|-------------|--------------------------------------|
| 100 | 1           | 0.108                                |
| 110 | $\sqrt{2}$  | 0.153                                |
| 111 | $\sqrt{3}$  | 0.187                                |
| 200 | 2           | 0.216                                |
| 211 | $\sqrt{6}$  | 0.265                                |
| 220 | $\sqrt{8}$  | 0.306                                |
| 300 | 3           | 0.325                                |
| 222 | $\sqrt{15}$ | 0.375                                |
| 400 | 4           | 0.433                                |
| 411 | $\sqrt{18}$ | 0.460                                |
| 600 | 6           | 0.650                                |
| 621 | $\sqrt{41}$ | 0.693                                |
| 700 | 7           | 0.757                                |
| 710 | $\sqrt{50}$ | 0.765                                |
| 800 | 8           | 0.866                                |

**Table S7.** *t*-Rha\*-SC14 (at 125 °C) cubic phase structure parameter estimation using the Pm3m (simple cubic structure) structure lattice parameters with program Scatter SWAXS data analyzing program. Cubic lattice parameter of  $a_{\text{Cub}}=4.9$  nm was calculated with Scatter

| hkl | $q/q^*$     | $q_{\text{hkl}}$ [nm]<br>Scatter fit |
|-----|-------------|--------------------------------------|
| 100 | 1           | 0.127                                |
| 110 | $\sqrt{2}$  | 0.180                                |
| 111 | $\sqrt{3}$  | 0.221                                |
| 200 | 2           | 0.255                                |
| 300 | 3           | 0.382                                |
| 400 | 4           | 0.509                                |
| 422 | $\sqrt{24}$ | 0.624                                |
| 500 | 5           | 0.637                                |
| 600 | 6           | 0.764                                |
| 700 | 7           | 0.891                                |

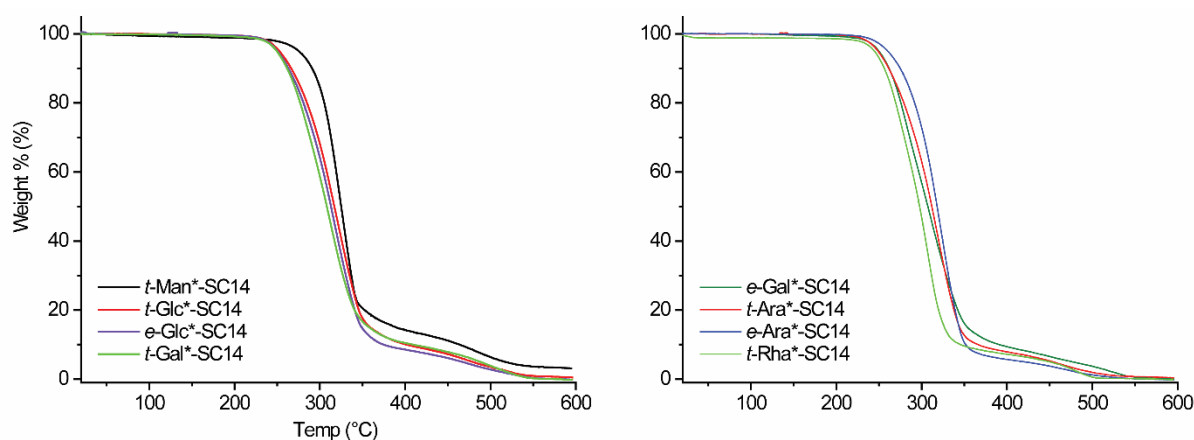

**Figure S13.** TGA graphs for all compounds studied with SWAXS.

## References

- 1 W. Schmid and G. M. Whitesides, *J. Am. Chem. Soc.*, 1991, **113**, 6674–6675.
- 2 E. Kim, D. M. Gordon, W. Schmid and G. M. Whitesides, *J. Org. Chem.*, 1993, **58**, 5500–5507.
- 3 T. Saloranta, A. Peuronen, J. M. Dieterich, J. Ruokolainen, M. Lahtinen and R. Leino, *Cryst. Growth Des.*, 2016, **16**, 655–661.
- 4 T. Saloranta, C. Müller, D. Vogt and R. Leino, *Chem. - A Eur. J.*, 2008, **14**, 10539–10542.
- 5 B. Delley, *J. Chem. Phys.*, 1990, **92**, 508–517.
- 6 B. Delley, *J. Chem. Phys.*, 2000, **113**, 7756–7764.
- 7 A. D. Bochevarov, E. Harder, T. F. Hughes, J. R. Greenwood, D. A. Braden, D. M. Philipp, D. Rinaldo, M. D. Halls, J. Zhang and R. A. Friesner, *Int. J. Quantum Chem.*, 2013, **113**, 2110–2142.
- 8 Maestro and Schrödinger, 2019.
- 9 A. D. Becke, *J. Chem. Phys.*, 1993, **98**, 5648–5652.
- 10 C. Lee, W. Yang and R. G. Parr, *Phys. Rev. B*, 1988, **37**, 785–789.
- 11 S. H. Vosko, L. Wilk and M. Nusair, *Can. J. Phys.*, 1980, **58**, 1200–1211.
- 12 P. J. Stephens, F. J. Devlin, C. F. Chabalowski and M. J. Frisch, *J. Phys. Chem.*, 1994, **98**, 11623–11627.

- 13 E. R. McNellis, J. Meyer and K. Reuter, *Phys. Rev. B*, 2009, **80**, 205414.
- 14 B. Delley, *Mol. Simul.*, 2006, **32**, 117–123.
